# Supplementary material for: Early life exposures and the risk of inflammatory bowel disease: Systematic review and meta-analyses
Source: PubMed Central journal article supplement — eClinicalMedicine. 2021 May 15;36:100884. doi: 10.1016/j.eclinm.2021.100884 (PMC8257976; doi:10.1016/j.eclinm.2021.100884), 2021-05-15

## **SUPPLEMENTARY APPENDIX**

This appendix provides readers additional information about the study protocol, the literature search and results.

Supplement to: “Early-life Exposures and Risk of Inflammatory Bowel Disease: a Systematic Review and Meta-analysis “

## SUPPLEMENTARY APPENDIX

### **Appendix A: Study Protocol and Literature Search**

1. Study identification
2. Eligibility criteria
3. Study selection and data abstraction
4. Risk of bias and study quality
5. Qualitative and quantitative analysis
6. Literature search and results

### **Appendix B: Supplementary Tables**

**Supplementary Tables 1 a–j:** Extracted data from studies on the association between early life exposures and inflammatory bowel disease

- a. Maternal health and exposures during pregnancy
- b. Perinatal factors
- c. Birth month and related factors
- d. Breastfeeding
- e. Hygiene-related factors
- f. Social factors
- g. Immigration
- h. Infections
- i. Antibiotics and other medications
- j. Passive exposure to tobacco smoke

**Supplementary Table 2:** Newcastle Ottawa Scale grading of all included studies

2a: Newcastle Ottawa Scale grading of case-control studies

2b: Newcastle Ottawa Scale grading of cohort studies

### **Appendix C: Supplementary Figures 1-33**

## **APPENDIX A – STUDY PROTOCOL AND LITERATURE SEARCH**

### **1. Study identification**

We conducted the identification and retrieval of studies in accordance with the Preferred Reporting Items for Systematic Reviews and Meta-Analyses (PRISMA) statement. We developed and executed a comprehensive search strategy in collaboration with a medical librarian (CS). We searched Embase (Ovid), MEDLINE ALL (Ovid), and Global Health (Ovid) databases from the date of database inception through May 23, 2019. We repeated the search from January 2019 until July 14, 2020 to identify the more recent studies. We did not apply any language or date restriction at the initial search. We applied a filter for observational studies, adapted from the Observational Studies search filter developed by the Scottish Intercollegiate Guidelines Network (SIGN). The search was designed using a combination of free-text terms and subject headings specific to each database, EMBASE Emtree subject headings, MEDLINE Medical Subject Headings (MeSH), and Global Health CABI subject headings. We also searched references of all included studies as well as pertinent reviews. The full search query for all biomedical platforms is available in Appendix A. Search results were exported into the Covidence platform and de-duplicated. The review protocol was registered with PROSPERO (CRD42019134980). The following are deviations from the registered protocol: given that several important exposures were reported in smaller cohort and case-control studies, including exposures that cannot be ascertained in population-based administrative data, we extended the review beyond population-based studies. While we did not plan quantitative review at the outset due to heterogeneity overall, we added quantitative synthesis to the review in order to add further objectivity and granularity. We included all studies, including non-English at the initial search. Given the number of studies to be screened, and lack of relevant non-English studies, we excluded non-English studies during abstract screening.

### **2. Eligibility criteria**

We included case-control and cohort studies that determined the association of early-life environmental risk factors with CD, UC or IBD overall. Early-life was defined as extending from prenatal period to 5 years of age. Based on prior literature review (MA, JS), we included all relevant nongenetic exposures and categorized them into (1) maternal exposures and health during pregnancy, (2) perinatal factors (3) birth month and related-factors (4) breastfeeding, (5) hygiene-related factors, (6) social factors, (7) immigration, (8) antibiotics and other medications, (9) offspring health, including infections, and (10) passive smoking. We excluded studies if the timing of the exposure was not clearly defined at  $\leq 5$  years of age. If studies reported data on both  $\leq 5$  and  $\geq 5$  years of age, we included only the former subset of patients. If multiple studies reported data from the same cohort, we included the most recent study, the one with the longest duration of follow-up, or the one with the largest sample size, in this order of priority. Studies published in a language other than English were excluded.

### **3. Study selection and data abstraction**

Study selection and data extraction were performed by two of seven investigators (MA, JS, CFG, JA, SCS, TL and JT) independently using the Covidence platform. Any conflict during abstract or full-text screening was resolved by review of the pertinent study jointly, with an additional arbiter when needed. Data were extracted per the Cochrane Consumers and Communication Review Group's template. The following elements were recorded: the name and year of the study, the country and region where it was conducted, study period and design, exposure(s) and outcome(s) and estimates.

### **4. Risk of bias and study quality**

The risk of bias and quality of studies were evaluated by two investigators independently, and jointly in case of discrepancy, using either the cohort or case-control studies instrument of the Newcastle-Ottawa Scale (NOS) (5). Studies

were evaluated in three domains: selection, comparability, and outcome, and were awarded a maximum of four, two or three points, respectively. A total score of seven or higher indicated a high-quality study.

## 5. Qualitative and quantitative analysis

We conducted random-effects meta-analyses to determine pooled estimates with 95% confidence intervals (CI) for homogenous exposures reported in  $\geq 2$  studies with comparable study design (cohort or case-control) and outcome (CD, UC or IBD). As recent meta-analyses have been conducted for exposures breastfeeding and mode of delivery, we deferred meta-analyzing data for these exposures. We report meta-analyses for the following exposures: maternal age at pregnancy, prenatal exposure to tobacco smoke, perinatal factors including preterm birth and birth weight, rural versus urban living, passive exposure to tobacco smoke during childhood, measles vaccination, otitis media and antibiotic exposure during the first year of life. Adjusted estimates were used when available. When relevant data were available from cohort studies, we calculated odds ratios in order to be able to pool with odds ratios from case-control studies. When feasible, case-control and cohort studies estimates were pooled and meta-regression performed to determine if there were differences based on study type. Heterogeneity was evaluated using the  $I^2$  score. Meta-analyses were performed using the Comprehensive Meta-Analysis (version 2.0; Biostat, Englewood, NJ).

For exposure categories that were not analyzed quantitatively, we extracted relevant data and performed a systematic review.

## 6. Literature search and results

Literature search was run on Friday, May 24th 2019 and repeated on July 14, 2020.

### Embase Classic+Embase 1947 to 2019 May 23

15351 references

1. exp migrant/
2. exp migration/
3. exp ethnology/
4. (emigra\* or immigra\* or migrant\* or migrat\* or ethnolog\* or transient\*).tw,kw.
5. or/1-4
6. exp antibiotic agent/
7. exp nonsteroid antiinflammatory agent/
8. oral contraception/ or exp oral contraceptive agent/ or hormonal contraception/
9. ((oral\* or hormon\*) adj3 contracept\*).tw,kw.
10. (antibiotic\* or penicillin\* or cephalosporin\* or tetracycline\* or doxycycline\* or minocycline\* or fluoroquinolone\* or macrolide\* or sulfonamide\* or metronidazole\* or vancomycin\*).tw,kw.
11. (nsaid\* or ocp\*).tw,kw.
12. ((nonsteroid\* or non-steroid\*) adj3 (antiinflammator\* or anti-inflammator\* or (anti adj2 inflammator\*))).tw,kw.
13. or/6-12
14. exp helicobacter/
15. exp Campylobacter/
16. Helicobacter\*.tw,kw.
17. Campylobacter\*.tw,kw.
18. (H adj2 pylori).tw,kw.
19. cagA.tw,kw.
20. ((cytotoxin-associated or (cytotoxin adj2 associated)) adj4 A).tw,kw.

21. VacA.tw,kw.
22. (Vacuolating adj2 cytotoxin\*).tw,kw.
23. exp disease elimination/
24. (eradication or elimination).tw,kw.
25. or/14-24
26. exp instrumental delivery/ or vaginal delivery/
27. (c?esarean\* or c-section\* or csection\*).tw,kw.
28. (mode adj4 deliver\*).tw,kw.
29. or/26-28
30. exp vaccine/
31. vaccin\*.tw,kw.
32. appendectomy/
33. (appendectom\* or appendicectom\* or appendicitis).tw,kw.
34. appendix.tw,kw.
35. exp tonsillectomy/
36. tonsillectom\*.tw,kw.
37. or/30-36
38. exp "physical activity, capacity and performance"/
39. exp sport/
40. (physical adj4 activit\*).tw,kw.
41. (exercis\* or sport\*).tw,kw.
42. or/38-41
43. environmental exposure/
44. exp domestic animal/
45. exp farm animal/
46. urban rural difference/
47. urban hygiene/
48. rural hygiene/ or rural population/
49. urban population/
50. "crowding (area)"/
51. population density/ or population abundance/ or population size/
52. family size/
53. birth order/
54. environmental sanitation/ or exp microbial contamination/ or pollution control/ or pollution transport/ or exp water management/
55. refrigerator/
56. exp food preservation/
57. exp socioeconomics/
58. exp "pollution and pollution related phenomena"/
59. sun exposure/
60. exp ultraviolet radiation/
61. exp vitamin D/ or folic acid/
62. exp child abuse/
63. (environmental adj4 (factor\* or exposure\*)).tw,kw.
64. (protect\* adj3 factor\*).tw,kw.

65. (early adj3 life).tw,kw.
66. ((domestic\* or farm\*) adj4 animal\*).tw,kw.
67. (pet or pets or dog\* or cat or cats).tw,kw.
68. (famil\* adj4 size\*).tw,kw.
69. (birth adj4 order).tw,kw.
70. (sanitation or refrigerat\* or pasteuriz\* or pollut\* or (food adj4 preserv\*)).tw,kw.
71. (urban\* or rural\*).tw,kw.
72. socioeconomic\*.tw,kw.
73. ((parent\* adj3 occupation) or (social adj3 mixing)).tw,kw.
74. latitude/
75. (sun or ultraviolet\* or UV or UVs or (vitamin adj4 D) or folate or (folic adj3 acid\*) or latitude).tw,kw.
76. or/43-75
77. maternal stress/
78. exp maternal care/ or prenatal exposure/
79. maternal smoking/
80. ((maternal or mother\* or pregnan\* or postpartum or post-partum or prenatal\* or pre-natal\* or postnatal\* or post-natal\* or perinatal\* or peri-natal\* or peripartum or peri-partum or prepartum or pre-partum) adj5 (diet\* or nutrition\* or infection\* or smok\* or stress\*)).tw,kw.
81. ((maternal or mother\* or pregnan\* or postpartum or post-partum or prenatal\* or pre-natal\* or postnatal\* or post-natal\* or perinatal\* or peri-natal\* or peripartum or peri-partum or prepartum or pre-partum) adj5 (risk adj4 factor\*)).tw,kw.
82. or/77-81
83. exp child nutrition/
84. weaning/
85. (breastfeeding or breast-feeding or breastfed\* or lactation or formula\* or colostrum or (human adj3 milk\*) or emulsifier\*).tw,kw.
86. ((breast or bottle\* or infant\* or child\*) adj4 feeding).tw,kw.
87. weaning.tw,kw.
88. or/83-87
89. exp parasite/
90. exp helminth/
91. exp hygiene/
92. hygiene hypothesis/
93. exp parasitosis/
94. exp smoking/
95. tobacco/
96. parasit\*.tw,kw.
97. (helminth\* or nematode\* or tapeworm\* or ascaria\* or flatworm\* or cestod\* or trematod\*).tw,kw.
98. hygien\*.tw,kw.
99. infestation.tw,kw.
100. (smok\* or tobacco\*).tw,kw.
101. (diet\* or nutrition\* or food\*).tw,kw.
102. or/89-101
103. exp child/
104. exp pediatrics/

105. (Infan\* or newborn\* or new-born\* or perinat\* or neonat\* or baby\* or babies or toddler\* or minors\* or boy or boys or boyfriend or boyhood or girl\* or kid or kids or child\* or schoolchild\* or school-child\*).mp.
106. (p?ediatric\* or peadiatric\* or prematur\* or preterm\*).mp.
107. school\*.tw,kw.
108. or/103-107
109. 102 and 108
110. 5 or 13 or 25 or 29 or 37 or 42 or 76 or 82 or 88 or 109
111. exp inflammatory bowel disease/
112. (inflammatory adj4 bowel adj4 disease\*).tw,kw.
113. ((ulcerative or ulcerous or mucosal or Idiopathic) adj3 (colitis or proctocolitis or coloproctitis)).tw,kw.
114. (colitis adj3 (gravis or ulcerativa or ulcerosa)).tw,kw.
115. ((Crohn\* or granulomatous) adj3 (disease\* or enteritis or ileitis or ileitides or colitis or enterocolitis)).tw,kw.
116. ((regional or terminal) adj3 (enteritis or ileitis or ileitides or colitis or enterocolitis)).tw,kw.
117. (morbus adj3 crohn\*).tw,kw.
118. or/111-117
119. Clinical study/
120. exp Case control study/
121. Family study/
122. Longitudinal study/
123. Retrospective study/
124. Prospective study/ or exp incidence/ or exp prevalence/
125. Randomized controlled trials/ or intervention study/
126. 124 not 125
127. Cohort analysis/
128. (Case control adj3 (study or studies)).mp.
129. (observational adj3 (study or studies)).mp.
130. (epidemiologic\* adj3 (study or studies)).mp.
131. (cross sectional adj3 (study or studies)).mp.
132. (cohort or prospective or retrospective or population based or longitudinal).mp.
133. or/119-123,126-132
134. 110 and 118 and 133

**Ovid MEDLINE (R) ALL 1946 to May 23, 2019**

6315 references

1. "Transients and Migrants"/
2. exp Human Migration/
3. Ethnology/
4. (emigra\* or immigra\* or migrant\* or migrat\* or ethnolog\* or transient\*).tw,kf.
5. or/1-4
6. exp anti-bacterial agents/ or exp antifungal agents/
7. exp Anti-Inflammatory Agents, Non-Steroidal/
8. exp Contraception/
9. ((oral\* or hormon\*) adj3 contracept\*).tw,kf.

10. (antibiotic\* or penicillin\* or cephalosporin\* or tetracycline\* or doxycycline\* or minocycline\* or fluoroquinolone\* or macrolide\* or sulfonamide\* or metronidazole\* or vancomycin\*).tw,kf.
11. (nsaid\* or ocp\*).tw,kf.
12. ((nonsteroid\* or non-steroid\*) adj3 (antiinflammator\* or anti-inflammator\* or (anti adj2 inflammator\*))).tw,kf.
13. or/6-12
14. exp Helicobacter/
15. exp Campylobacter/
16. Helicobacter\*.tw,kf.
17. Campylobacter\*.tw,kf.
18. (H adj2 pylori).tw,kf.
19. cagA.tw,kf.
20. ((cytotoxin-associated or (cytotoxin adj2 associated)) adj4 A).tw,kf.
21. VacA.tw,kf.
22. (Vacuolating adj2 cytotoxin\*).tw,kf.
23. exp Disease Eradication/
24. (eradication or elimination).tw,kf.
25. or/14-24
26. exp Delivery, Obstetric/
27. (c?esarean\* or c-section\* or csection\*).tw,kf.
28. (mode adj4 deliver\*).tw,kf.
29. or/26-28
30. exp Vaccines/
31. vaccin\*.tw,kf.
32. Appendectomy/
33. (appendectom\* or appendicectom\* or appendicitis).tw,kf.
34. appendix.tw,kf.
35. Tonsillectomy/
36. tonsillectom\*.tw,kf.
37. or/30-36
38. exp Exercise/
39. exp Sports/
40. (physical adj4 activit\*).tw,kf.
41. (exercis\* or sport\*).tw,kf.
42. or/38-41
43. exp Environmental Exposure/
44. exp Animals, Domestic/
45. exp Hygiene/
46. exp Population/
47. exp population health/ or maternal health/
48. population density/
49. Family Characteristics/
50. birth order/ or "social determinants of health"/
51. Sanitation/
52. Refrigeration/
53. exp Food Handling/



54. child health/ or infant health/ or maternal health/ or exp socioeconomic factors/
55. exp Environmental Pollution/
56. sunlight/
57. ultraviolet rays/
58. exp Vitamin D/ or exp Vitamin D Deficiency/ or exp Folic Acid/
59. exp Child Abuse/
60. (environmental adj4 (factor\* or exposure\*)).tw,kf.
61. (protect\* adj3 factor\*).tw,kf.
62. (early adj3 life).tw,kf.
63. ((domestic\* or farm\*) adj4 animal\*).tw,kf.
64. (pet or pets or dog\* or cat or cats).tw,kf.
65. (famil\* adj4 size\*).tw,kf.
66. (birth adj4 order).tw,kf.
67. (sanitation or refrigerat\* or pasteuriz\* or pollut\* or (food adj4 preserv\*)).tw,kf.
68. (urban\* or rural\*).tw,kf.
69. socioeconomic\*.tw,kf.
70. ((parent\* adj3 occupation) or (social adj3 mixing)).tw,kf.
71. (sun or ultraviolet\* or UV or UVs or (vitamin adj4 D) or folate or (folic adj3 acid\*) or latitude).tw,kf.
72. or/43-71
73. exp Maternal Behavior/
74. Prenatal Exposure Delayed Effects/
75. ((maternal or mother\* or pregnan\* or postpartum or post-partum or prenatal\* or pre-natal\* or postnatal\* or post-natal\* or perinatal\* or peri-natal\* or peripartum or peri-partum or prepartum or pre-partum) adj5 (diet\* or nutrition\* or infection\* or smok\* or stress\*)).tw,kf.
76. ((maternal or mother\* or pregnan\* or postpartum or post-partum or prenatal\* or pre-natal\* or postnatal\* or post-natal\* or perinatal\* or peri-natal\* or peripartum or peri-partum or prepartum or pre-partum) adj5 (risk adj4 factor\*)).tw,kf.
77. or/73-76
78. child nutritional physiological phenomena/ or exp infant nutritional physiological phenomena/ or exp maternal nutritional physiological phenomena/
79. exp Lactation/
80. (breastfeeding or breast-feeding or breastfed\* or lactation or formula\* or colostrum or (human adj3 milk\*) or emulsifier\*).tw,kf.
81. ((breast or bottle\* or infant\* or child\*) adj4 feeding).tw,kf.
82. weaning.tw,kf.
83. or/78-82
84. exp helminths/
85. parasites/
86. exp hygiene/
87. hygiene hypothesis/
88. exp Parasitic Diseases/
89. exp "tobacco use"/
90. parasit\*.tw,kf.
91. (helminth\* or nematode\* or tapeworm\* or ascaris\* or flatworm\* or cestod\* or trematod\*).tw,kf.
92. hygien\*.tw,kf.

93. infestation.tw,kf.
94. (smok\* or tobacco\*).tw,kf.
95. (diet\* or nutrition\* or food\*).tw,kf.
96. or/84-95
97. exp child/ or exp infant/ or minors/
98. exp Pediatrics/
99. (Infan\* or newborn\* or new-born\* or perinat\* or neonat\* or baby\* or babies or toddler\* or minors\* or boy or boys or boyfriend or boyhood or girl\* or kid or kids or child\* or schoolchild\* or school-child\*).mp.
100. (p?ediatric\* or peadiatric\* or prematur\* or preterm\*).mp.
101. school\*.tw,kf.
102. or/97-101
103. 96 and 102
104. 5 or 13 or 25 or 29 or 37 or 42 or 72 or 77 or 83 or 103
105. exp Inflammatory Bowel Diseases/
106. (inflammatory adj4 bowel adj4 disease\*).tw,kf.
107. ((ulcerative or ulcerous or mucosal or Idiopathic) adj3 (colitis or proctocolitis or coloproctitis)).tw,kf.
108. (colitis adj3 (gravis or ulcerativa or ulcerosa)).tw,kf.
109. ((Crohn\* or granulomatous) adj3 (disease\* or enteritis or ileitis or ileitides or colitis or enterocolitis)).tw,kf.
110. ((regional or terminal) adj3 (enteritis or ileitis or ileitides or colitis or enterocolitis)).tw,kf.
111. (morbus adj3 crohn\*).tw,kf.
112. or/105-111
113. Clinical study/ or observational study/ or comparative study/ or Observational Studies as Topic/
114. controlled before-after studies/ or cross-sectional studies/ or historically controlled study/ or interrupted time series analysis/
115. exp case-control studies/
116. epidemiologic studies/ or epidemiologic methods/
117. longitudinal studies/
118. retrospective studies/
119. Prospective Studies/ or incidence/ or prevalence/
120. randomized controlled trial/
121. 119 not 120
122. cohort studies/
123. (Case control adj3 (study or studies)).mp.
124. (observational adj3 (study or studies)).mp.
125. (epidemiologic\* adj3 (study or studies)).mp.
126. (cross sectional adj3 (study or studies)).mp.
127. (cohort or prospective or retrospective or population based or longitudinal).mp.
128. or/113-118,121-127
129. 104 and 112 and 128

### **Global Health 1910 to 2019 Week 19**

1396 references

1. exp migrants/
2. migration/

3. (emigra\* or immigra\* or migrant\* or migrat\* or ethnolog\* or transient\*).tw,kw.
4. or/1-3
5. exp antibiotics/
6. exp non-steroidal antiinflammatory agents/
7. exp oral contraceptives/ or exp contraceptives/
8. ((oral\* or hormon\*) adj3 contracept\*).tw,kw.
9. (antibiotic\* or penicillin\* or cephalosporin\* or tetracycline\* or doxycycline\* or minocycline\* or fluoroquinolone\* or macrolide\* or sulfonamide\* or metronidazole\* or vancomycin\*).tw,kw.
10. (nsaid\* or ocp\*).tw,kw.
11. ((nonsteroid\* or non-steroid\*) adj3 (antiinflammator\* or anti-inflammator\* or (anti adj2 inflammator\*))).tw,kw.
12. or/5-11
13. exp helicobacter/
14. exp campylobacter/
15. Helicobacter\*.tw,kw.
16. Campylobacter\*.tw,kw.
17. (H adj2 pylori).tw,kw.
18. cagA.tw,kw.
19. ((cytotoxin-associated or (cytotoxin adj2 associated)) adj4 A).tw,kw.
20. VacA.tw,kw.
21. (Vacuolating adj2 cytotoxin\*).tw,kw.
22. disease control/
23. (eradication or elimination).tw,kw.
24. or/13-23
25. caesarean section/ or exp birth/
26. (c?esarean\* or c-section\* or csection\*).tw,kw.
27. (mode adj4 deliver\*).tw,kw.
28. or/25-27
29. exp vaccines/
30. vaccin\*.tw,kw.
31. (appendectom\* or appendicectom\* or appendicitis).tw,kw.
32. appendix.tw,kw.
33. tonsillectom\*.tw,kw.
34. or/29-33
35. exp physical activity/
36. exp sport/
37. (physical adj4 activit\*).tw,kw.
38. (exercis\* or sport\*).tw,kw.
39. or/35-38
40. exposure/
41. exp domestic animals/
42. pets/
43. exp hygiene/
44. rural population/
45. urban population/
46. population density/ or overpopulation/

47. exp crowding/
48. family size/
49. sanitation/ or food sanitation/ or sewage/ or waste disposal/
50. refrigerators/ or refrigeration/
51. exp food preservation/ or microbial contamination/ or food contamination/ or food hygiene/
52. socioeconomics/
53. exp pollution/ or pollution control/
54. solar radiation/
55. ultraviolet radiation/
56. exp vitamin d/ or folic acid/
57. child abuse/
58. (environmental adj4 (factor\* or exposure\*)).tw,kw.
59. (protect\* adj3 factor\*).tw,kw.
60. (early adj3 life).tw,kw.
61. ((domestic\* or farm\*) adj4 animal\*).tw,kw.
62. (pet or pets or dog\* or cat or cats).tw,kw.
63. (famil\* adj4 size\*).tw,kw.
64. (birth adj4 order).tw,kw.
65. (sanitation or refrigerat\* or pasteuriz\* or pollut\* or (food adj4 preserv\*)).tw,kw.
66. (urban\* or rural\*).tw,kw.
67. socioeconomic\*.tw,kw.
68. ((parent\* adj3 occupation) or (social adj3 mixing)).tw,kw.
69. latitude/
70. (sun or ultraviolet\* or UV or UVs or (vitamin adj4 D) or folate or (folic adj3 acid\*) or latitude).tw,kw.
71. or/40-70
72. lactating women/ or pregnant women/
73. exp prenatal period/
74. maternal nutrition/
75. ((maternal or mother\* or pregnan\* or postpartum or post-partum or prenatal\* or pre-natal\* or postnatal\* or post-natal\* or perinatal\* or peri-natal\* or peripartum or peri-partum or prepartum or pre-partum) adj5 (diet\* or nutrition\* or infection\* or smok\* or stress\*)).tw,kw.
76. ((maternal or mother\* or pregnan\* or postpartum or post-partum or prenatal\* or pre-natal\* or postnatal\* or post-natal\* or perinatal\* or peri-natal\* or peripartum or peri-partum or prepartum or pre-partum) adj5 (risk adj4 factor\*)).tw,kw.
77. or/72-76
78. exp child nutrition/ or child feeding/ or exp infant feeding/
79. weaning/
80. (breastfeeding or breast-feeding or breastfed\* or lactation or formula\* or colostrum or (human adj3 milk\*) or emulsifier\*).tw,kw.
81. ((breast or bottle\* or infant\* or child\*) adj4 feeding).tw,kw.
82. weaning.tw,kw.
83. or/78-82
84. parasites/ or animal parasitic nematodes/
85. helminths/
86. toilets/

87. parasitoses/
88. tobacco smoking/
89. passive smoking/
90. parasit\*.tw,kw.
91. (helminth\* or nematode\* or tapeworm\* or ascaris\* or flatworm\* or cestod\* or trematod\*).tw,kw.
92. hygien\*.tw,kw.
93. infestation.tw,kw.
94. (smok\* or tobacco\*).tw,kw.
95. (diet\* or nutrition\* or food\*).tw,kw.
96. or/84-95
97. exp children/
98. paediatrics/
99. (Infan\* or newborn\* or new-born\* or perinat\* or neonat\* or baby\* or babies or toddler\* or minors\* or boy or boys or boyfriend or boyhood or girl\* or kid or kids or child\* or schoolchild\* or school-child\*).mp.
100. (p?ediatric\* or peadiatric\* or prematur\* or preterm\*).mp.
101. school\*.tw,kw.
102. or/97-101
103. 96 and 102
104. 4 or 12 or 24 or 28 or 34 or 39 or 71 or 77 or 83 or 103
105. exp inflammatory bowel diseases/
106. (inflammatory adj4 bowel adj4 disease\*).tw,kw.
107. ((ulcerative or ulcerous or mucosal or Idiopathic) adj3 (colitis or proctocolitis or coloproctitis)).tw,kw.
108. (colitis adj3 (gravis or ulcerativa or ulcerosa)).tw,kw.
109. ((Crohn\* or granulomatous) adj3 (disease\* or enteritis or ileitis or ileitides or colitis or enterocolitis)).tw,kw.
110. ((regional or terminal) adj3 (enteritis or ileitis or ileitides or colitis or enterocolitis)).tw,kw.
111. (morbus adj3 crohn\*).tw,kw.
112. or/105-111
113. case studies/
114. case-control studies/
115. longitudinal studies/
116. retrospective studies/
117. epidemiology/ or disease prevalence/ or epidemiological surveys/
118. cohort studies/
119. (Case control adj3 (study or studies)).mp.
120. (observational adj3 (study or studies)).mp.
121. (epidemiologic\* adj3 (study or studies)).mp.
122. (cross sectional adj3 (study or studies)).mp.
123. (cohort or prospective or retrospective or population based or longitudinal or prevalence or incidence).mp.
124. or/113-123
125. 104 and 112 and 124

## APPENDIX B: Supplementary Tables

**Supplementary Tables 1 a–j:** Extracted data from studies on the association between early life exposures and inflammatory bowel disease

- a. Maternal health and exposures during pregnancy
- b. Perinatal factors
- c. Birth month and related factors
- d. Breastfeeding
- e. Hygiene-related factors
- f. Social factors
- g. Immigration
- h. Antibiotics and other medications
- i. Offspring health and infections
- j. Passive exposure to tobacco smoke

| Effect estimates | Symbol |
|------------------|--------|
| OR               | *      |
| aOR              | **     |
| HR               | †      |
| aHR              | ††     |
| IRR              | ‡      |
| aIRR             | ‡‡     |
| MD               | ¶      |
| RR               | §      |
| aRR              | §§     |
| SIR              | #      |

**Supplementary Table 2:** Newcastle Ottawa Scale grading of all included studies

2a: Newcastle Ottawa Scale grading of all included case-control studies

2b: Newcastle Ottawa Scale grading of all included cohort studies

| Study Type                                    | Study                                                | Study location              | Study Time Period                                 | Exposure Description                                                                                           | Total sample size (n)                          | Outcome   | Period of exposure | Effect estimate value | Confidence interval (specify if different from 95% CI) | Comments                                                                                                                                                                                                            |                                                                                                              |
|-----------------------------------------------|------------------------------------------------------|-----------------------------|---------------------------------------------------|----------------------------------------------------------------------------------------------------------------|------------------------------------------------|-----------|--------------------|-----------------------|--------------------------------------------------------|---------------------------------------------------------------------------------------------------------------------------------------------------------------------------------------------------------------------|--------------------------------------------------------------------------------------------------------------|
| Cohort Studies                                | Aspberg, S. et al. 2006                              | Sweden                      | 1987-2000                                         | Maternal smoking during pregnancy (any compared with none)                                                     | 274390                                         | CD        | Pregnancy          | 0.73 <sup>††</sup>    | 0.58-0.94                                              | Adjusting variables not reported                                                                                                                                                                                    |                                                                                                              |
|                                               |                                                      |                             |                                                   |                                                                                                                | 274390                                         | UC        | Pregnancy          | 0.7 <sup>††</sup>     | 0.56-0.86                                              |                                                                                                                                                                                                                     |                                                                                                              |
|                                               |                                                      |                             |                                                   |                                                                                                                | 1250224                                        | IBD       | Perinatal          | 0.87 <sup>††</sup>    | 0.69-1.10                                              |                                                                                                                                                                                                                     |                                                                                                              |
|                                               |                                                      |                             |                                                   | Maternal age (25-34 vs < 25)                                                                                   | 1249949                                        | CD        | Perinatal          | 0.8 <sup>††</sup>     | 0.63-1.01                                              |                                                                                                                                                                                                                     |                                                                                                              |
|                                               |                                                      |                             |                                                   |                                                                                                                | 1250078                                        | UC        | Perinatal          | 0.77 <sup>††</sup>    | 0.63-0.94                                              |                                                                                                                                                                                                                     |                                                                                                              |
|                                               |                                                      |                             |                                                   |                                                                                                                | 1110822                                        | IBD       | Perinatal          | 0.98 <sup>††</sup>    | 0.71-1.32                                              |                                                                                                                                                                                                                     |                                                                                                              |
|                                               |                                                      |                             |                                                   | Maternal age (25-34 vs > 35)                                                                                   | 1110583                                        | CD        | Perinatal          | 1.03 <sup>††</sup>    | 0.77-1.39                                              |                                                                                                                                                                                                                     |                                                                                                              |
|                                               |                                                      |                             |                                                   |                                                                                                                | 1110689                                        | UC        | Perinatal          | 0.86 <sup>††</sup>    | 0.65-1.13                                              |                                                                                                                                                                                                                     |                                                                                                              |
|                                               |                                                      |                             |                                                   | Preeclampsia                                                                                                   | 1436235                                        | IBD       | Perinatal          | 0.85 <sup>††</sup>    | 0.42-1.72                                              |                                                                                                                                                                                                                     |                                                                                                              |
|                                               |                                                      |                             |                                                   |                                                                                                                | 6685                                           | IBD       | Pregnancy          | 1.7 <sup>†</sup>      | 1.2-2.5                                                |                                                                                                                                                                                                                     |                                                                                                              |
|                                               | Blomster, T.M. et al. 2014                           | Finland                     | 1966                                              | Smoking during pregnancy                                                                                       | 6685                                           | IBD       | Pregnancy          | 1.6 <sup>†</sup>      | 1-2.4                                                  | Unadjusted estimates reported                                                                                                                                                                                       |                                                                                                              |
|                                               | Burnett, D. et al. 2020                              | Canada                      | 1988-2014                                         | Maternal age (clinical cohort)                                                                                 | 262705                                         | IBD       | Perinatal          | Not Significant       |                                                        |                                                                                                                                                                                                                     |                                                                                                              |
|                                               |                                                      |                             |                                                   | Maternal age (administrative cohort)                                                                           | 42906                                          | IBD       | Perinatal          | Not Significant       |                                                        |                                                                                                                                                                                                                     |                                                                                                              |
|                                               | Elten, M. et al. 2020                                | Canada                      | April 1st, 1991 to March 31st, 2014               | Maternal age                                                                                                   | 2218789                                        | IBD       | Perinatal          | Not Significant       |                                                        |                                                                                                                                                                                                                     | Adjusted for sex, maternal IBD, rural/urban area of residence at birth, median neighborhood household income |
|                                               |                                                      |                             |                                                   | Air pollutant, nitrogen dioxide                                                                                | 2218789                                        | IBD       | Pregnancy          | 1 <sup>††</sup>       | 0.96-1.03                                              |                                                                                                                                                                                                                     |                                                                                                              |
|                                               |                                                      |                             |                                                   | Air pollutant, fine particulate matter                                                                         | 2218789                                        | IBD       | Pregnancy          | 0.91 <sup>††</sup>    | 0.79-1.04                                              |                                                                                                                                                                                                                     |                                                                                                              |
|                                               |                                                      |                             |                                                   | Air pollutant, ozone                                                                                           | 2218789                                        | IBD       | Pregnancy          | 0.9 <sup>††</sup>     | 0.73-1.10                                              |                                                                                                                                                                                                                     |                                                                                                              |
|                                               |                                                      |                             |                                                   | Air pollutant, oxidant capacity                                                                                | 2218789                                        | IBD       | Prenatal           | 1.12 <sup>††</sup>    | 0.79-1.59                                              |                                                                                                                                                                                                                     |                                                                                                              |
|                                               | Greenbaum, S. et al. 2018                            | Israel                      | 1991-2014                                         | Maternal smoking during pregnancy                                                                              | 242342                                         | IBD       | Pregnancy          | 1.5 <sup>†</sup>      | 1.2-3.9                                                | Unadjusted estimates reported                                                                                                                                                                                       |                                                                                                              |
|                                               | Konjeti, G. et al. 2013                              | USA                         | 1976-2008                                         | Maternal age (20-29 vs 30-39)                                                                                  | 117976                                         | CD        | Perinatal          | 0.62 <sup>††</sup>    | 0.44-0.87                                              | Adjusted for age, BMI, tobacco use, regular use of oral contraceptives, exposure to parental smoking, birth weight, history of being breast fed, and being born preterm                                             |                                                                                                              |
|                                               |                                                      |                             |                                                   | Maternal age (20-29 vs > 40)                                                                                   | 117976                                         | CD        | Perinatal          | 0.87 <sup>††</sup>    | 0.43-1.75                                              |                                                                                                                                                                                                                     |                                                                                                              |
|                                               | Lange, A. et al. 2014                                | Denmark                     | 1995-2009                                         | Maternal smoking                                                                                               | 979039                                         | CD        | Infancy            | 0.8 <sup>††</sup>     | 0.6-1.2                                                | Adjusting variables not reported                                                                                                                                                                                    |                                                                                                              |
|                                               | Ortqvist, A.K. et al. 2017                           | Sweden                      | 2006-2013                                         | Antibiotics during pregnancy                                                                                   | 827239                                         | IBD       | Pregnancy          | 1.93 <sup>††</sup>    | 1.06-3.5                                               | Adjusted for maternal and paternal history of IBD, parental education, maternal and paternal country of birth, and mode of delivery                                                                                 |                                                                                                              |
|                                               |                                                      |                             |                                                   |                                                                                                                | 827239                                         | CD        | Pregnancy          | 2.48 <sup>††</sup>    | 1.01-6.08                                              |                                                                                                                                                                                                                     |                                                                                                              |
|                                               |                                                      |                             |                                                   |                                                                                                                | 827239                                         | UC        | Pregnancy          | 1.25 <sup>††</sup>    | 0.47-3.26                                              |                                                                                                                                                                                                                     |                                                                                                              |
|                                               | Ponsonby, A.L. et al. 2009                           | Australia                   | 1983-1998                                         | Maternal age (< 25 vs 26-28)                                                                                   | 513740                                         | CD        | Perinatal          | 1.29 <sup>†</sup>     | 0.89-1.85                                              | Adjusted for sex, abnormality, interventional birth, urban, married, SES, maternal age and year of birth                                                                                                            |                                                                                                              |
|                                               |                                                      |                             |                                                   | Maternal age (< 25 vs 29-32)                                                                                   | 565218                                         | CD        | Perinatal          | 1.48 <sup>†</sup>     | 1.05-2.08                                              |                                                                                                                                                                                                                     |                                                                                                              |
|                                               |                                                      |                             |                                                   | Maternal age (< 25 vs > 33)                                                                                    | 495539                                         | CD        | Perinatal          | 1.41 <sup>†</sup>     | 0.97-2.05                                              |                                                                                                                                                                                                                     |                                                                                                              |
|                                               |                                                      |                             |                                                   | Past spontaneous abortion (No vs Yes)                                                                          | 998655                                         | CD        | Perinatal          | 1.03 <sup>†</sup>     | 0.77-1.39                                              |                                                                                                                                                                                                                     |                                                                                                              |
|                                               | Case-Control Studies                                 | Bernstein, C.N. et al. 2017 | Canada                                            | 1984-2010                                                                                                      | Maternal infection within 9 mo before delivery | 12159     | IBD                | Pregnancy             | 0.96 <sup>††</sup>                                     | 0.84-1.09                                                                                                                                                                                                           | Adjusted for urban vs rural residence, SES, age, and sex                                                     |
| Maternal infection within 30d before delivery |                                                      |                             |                                                   |                                                                                                                | 12159                                          | IBD       | Pregnancy          | 0.97 <sup>††</sup>    | 0.82-1.14                                              |                                                                                                                                                                                                                     |                                                                                                              |
| Maternal infection peripartum                 |                                                      |                             |                                                   |                                                                                                                | 12159                                          | IBD       | Perinatal          | 0.86 <sup>††</sup>    | 0.68-1.09                                              |                                                                                                                                                                                                                     |                                                                                                              |
| Canova, C. et al. 2020                        |                                                      | Italy                       | 1989-2012                                         | Maternal age (25-29 vs < 25)                                                                                   | 829                                            | IBD       | Perinatal          | 0.97 <sup>††</sup>    | 0.57-1.63                                              | Adjusted for sex, year of birth, season of birth, having older siblings, number of births, birth weight, gestational age, Apgar score at 1 minute, maternal age and mother's education                              |                                                                                                              |
|                                               |                                                      |                             |                                                   | Maternal age (25-29 vs 30-34)                                                                                  | 1247                                           | IBD       | Perinatal          | 0.76 <sup>††</sup>    | 0.51-1.14                                              |                                                                                                                                                                                                                     |                                                                                                              |
|                                               |                                                      |                             |                                                   | Maternal age (25-29 vs 35-39)                                                                                  | 906                                            | IBD       | Perinatal          | 0.74 <sup>††</sup>    | 0.43-1.27                                              |                                                                                                                                                                                                                     |                                                                                                              |
|                                               |                                                      |                             |                                                   | Maternal age (25-29 vs >= 40)                                                                                  | 655                                            | IBD       | Perinatal          | 1.55 <sup>††</sup>    | 0.61-3.91                                              |                                                                                                                                                                                                                     |                                                                                                              |
| Ekblom, A. et al. 1990                        |                                                      | Sweden                      | 1924-1957                                         | Maternal age                                                                                                   | 771                                            | IBD       | Perinatal          | 0.4 <sup>†</sup>      | -1.8                                                   | Unadjusted estimates reported                                                                                                                                                                                       |                                                                                                              |
|                                               |                                                      |                             |                                                   |                                                                                                                | 771                                            | CD        | Perinatal          | 0.7 <sup>†</sup>      | -2.8                                                   |                                                                                                                                                                                                                     |                                                                                                              |
|                                               |                                                      |                             |                                                   |                                                                                                                | 771                                            | UC        | Perinatal          | 0.3 <sup>†</sup>      | -2.4                                                   |                                                                                                                                                                                                                     |                                                                                                              |
| Gruber, M. et al. 1996                        |                                                      | USA                         | Not Reported                                      | Mother smoking during pregnancy                                                                                | 144                                            | CD        | Pregnancy          | 0.604 <sup>†</sup>    | 0.29-1.3                                               | Unadjusted estimates reported                                                                                                                                                                                       |                                                                                                              |
| Han, D.Y. et al. 2010                         |                                                      | New Zealand                 | Not Reported                                      | Maternal smoking                                                                                               | 727                                            | CD        | Pregnancy          | 1.44 <sup>†</sup>     | 0.97-2.15                                              | Unadjusted estimates reported                                                                                                                                                                                       |                                                                                                              |
|                                               |                                                      |                             |                                                   | Mother takes any regular medication during her pregnancy                                                       | 851                                            | CD        | Pregnancy          | 2.02 <sup>†</sup>     | 1.09-3.75                                              |                                                                                                                                                                                                                     |                                                                                                              |
| Holmes, E.A. et al. 2019                      |                                                      | Australia                   | 2010-2013                                         | Mother smoking when pregnant                                                                                   | 495                                            | IBD       | Pregnancy          | Not Reported          |                                                        |                                                                                                                                                                                                                     |                                                                                                              |
| Huffless, S. et al. 2012                      |                                                      | USA                         | 1996-2006                                         | Gestational hypertension, preeclampsia, or eclampsia                                                           | 2825                                           | IBD       | Pregnancy          | 1.7 <sup>†</sup>      | 1-2.8                                                  | Adjusted for sex, race, maternal age, maternal smoking, maternal diabetes, known or suspected fetal abnormality, maternal IBD, maternal infection, and placental or amniotic problems                               |                                                                                                              |
|                                               |                                                      |                             |                                                   | Placental or amniotic problems                                                                                 | 2825                                           | IBD       | Pregnancy          | 1 <sup>†</sup>        | 0.7-1.5                                                |                                                                                                                                                                                                                     |                                                                                                              |
|                                               |                                                      |                             |                                                   | Maternal infection, inpatient or outpatient visit                                                              | 2825                                           | IBD       | Pregnancy          | 0.9 <sup>†</sup>      | 0.5-1.5                                                |                                                                                                                                                                                                                     |                                                                                                              |
| Mahid, S.S. et al. 2007                       |                                                      | USA                         | Not Reported                                      | Prenatal smoke exposure                                                                                        | 495                                            | CD        | Perinatal          | 1.72 <sup>††</sup>    | 1.1-2.71                                               | Adjusted for age                                                                                                                                                                                                    |                                                                                                              |
|                                               |                                                      |                             |                                                   |                                                                                                                | 419                                            | UC        | Perinatal          | 1.53 <sup>††</sup>    | 0.93-2.49                                              |                                                                                                                                                                                                                     |                                                                                                              |
| Malmberg, P. et al. 2012                      |                                                      | Sweden                      | 1973-2006                                         | Maternal UTI during pregnancy                                                                                  | 16975                                          | CD        | Pregnancy          | 1.27 <sup>†</sup>     | 1.01-1.59                                              | Unadjusted estimates reported                                                                                                                                                                                       |                                                                                                              |
| Radon, K. et al. 2007                         |                                                      | Germany                     | March 2006 to August 2006                         | Smoking during pregnancy                                                                                       | 2229                                           | IBD       | Pregnancy          | Not reported          |                                                        | Adjusted for age, gender, region, parental education, maternal and paternal history of IBD, nutrition other than breast milk at <5mo, birth weight ≤ 2500 g, ≥ 2 older siblings, rhinitis, and living in urban area |                                                                                                              |
|                                               |                                                      |                             |                                                   |                                                                                                                | 2229                                           | CD        | Pregnancy          | 0.5 <sup>††</sup>     | 0.3-0.8                                                |                                                                                                                                                                                                                     |                                                                                                              |
|                                               |                                                      |                             |                                                   |                                                                                                                | 2229                                           | UC        | Pregnancy          | 0.9 <sup>††</sup>     | 0.6-1.3                                                |                                                                                                                                                                                                                     |                                                                                                              |
| Russell, R.K. et al. 2005                     |                                                      | Scotland                    | Not Reported                                      | Maternal smoking during pregnancy                                                                              | 124                                            | IBD       | Pregnancy          | 4.46 <sup>†</sup>     | 1.16-17.1                                              | Unadjusted estimates reported                                                                                                                                                                                       |                                                                                                              |
| Sonntag, B. et al. 2007                       |                                                      | Germany                     | 2003-2004                                         | Disease During Pregnancy                                                                                       | 1834                                           | CD        | Pregnancy          | 1.519 <sup>††</sup>   | 0.905-2.551                                            | Adjusted for disease during 1st year, preterm birth, maternal IBD, appendectomy, ever smoking, sex                                                                                                                  |                                                                                                              |
|                                               |                                                      |                             |                                                   |                                                                                                                | 1548                                           | UC        | Pregnancy          | 1.267 <sup>††</sup>   | 0.735-2.183                                            |                                                                                                                                                                                                                     |                                                                                                              |
| Striscuglio, C. et al. 2017                   |                                                      | Italy                       | 2000-2014                                         | Diseases during pregnancy (Risk of premature delivery, hormonal treatment, diabetes, hypertension, infections) | 467                                            | IBD       | Pregnancy          | Not reported          |                                                        |                                                                                                                                                                                                                     |                                                                                                              |
| Thompson, N.P. et al. 2000                    |                                                      | UK                          | 1946-1958                                         | Infection during pregnancy                                                                                     | 287                                            | CD        | Pregnancy          | 1.27 <sup>†</sup>     | 0.26-5.31                                              | Unadjusted estimates reported                                                                                                                                                                                       |                                                                                                              |
|                                               |                                                      |                             |                                                   |                                                                                                                | 287                                            | UC        | Pregnancy          | 0.84 <sup>†</sup>     | 0.12-4.35                                              |                                                                                                                                                                                                                     |                                                                                                              |
| Thorsen, S.U. et al. 2016                     |                                                      | Denmark                     | 1981-2004                                         | Maternal age at delivery 25-35 compared with <25 years                                                         | 384                                            | IBD       | Perinatal          | 1.27 <sup>††</sup>    | 0.89-1.80                                              | Adjusted for 25(OH)D, gender, ethnicity, birth weight (categorical), gestational age (categorical) and mother's age (categorical)                                                                                   |                                                                                                              |
|                                               | Maternal age at delivery ≥35 compared with <25 years |                             |                                                   | 384                                                                                                            | IBD                                            | Perinatal | 1.29 <sup>††</sup> | 0.71-2.36             |                                                        |                                                                                                                                                                                                                     |                                                                                                              |
| van der Sloot, K. et al. 2020                 | Netherlands                                          | Not Reported                | Prenatal smoking                                  | 1671                                                                                                           | CD                                             | Pregnancy | 1.89 <sup>†</sup>  | 1.38-2.59             | Adjusted for age, sex, and history of smoking          |                                                                                                                                                                                                                     |                                                                                                              |
|                                               |                                                      |                             |                                                   | 1669                                                                                                           | UC                                             | Pregnancy | 1.62 <sup>†</sup>  | 1.17-2.24             |                                                        |                                                                                                                                                                                                                     |                                                                                                              |
| Van Limbergen, J.E. et al. 2009               | Scotland                                             | Not Reported                | Parental smoking during pregnancy, at birth       | 252                                                                                                            | IBD                                            | Neonatal  | Not reported       |                       |                                                        |                                                                                                                                                                                                                     |                                                                                                              |
| Velosa, M. et al. 2019                        | Israel                                               | 1964-1976                   | Mother's age at the time of delivery              | 1744                                                                                                           | IBD                                            | Perinatal | Not reported       |                       |                                                        |                                                                                                                                                                                                                     |                                                                                                              |
| Yoles, I. et al. 2018                         | Israel                                               | 1991-2014                   | Maternal Group B Streptococcus (GBS) colonization | 195457                                                                                                         | IBD                                            | Pregnancy | 1.29 <sup>†</sup>  | 1.03-1.6              | Adjusting variables not reported                       |                                                                                                                                                                                                                     |                                                                                                              |
| Yu, I. et al. 2016                            | Ireland                                              | 2012-2015                   | Maternal smoking during pregnancy                 | 209                                                                                                            | CD                                             | Pregnancy | Not reported       |                       |                                                        |                                                                                                                                                                                                                     |                                                                                                              |
|                                               |                                                      |                             |                                                   | 187                                                                                                            | UC                                             | Pregnancy | Not reported       |                       |                                                        |                                                                                                                                                                                                                     |                                                                                                              |

| Study Type                    | Study                             | Study location            | Study Time Period                                        | Exposure Description                                          | Total sample size (n) | Outcome  | Period of exposure (prenatal/ perinatal/ infancy/2-5 years of age) | Effect Estimate value | Confidence interval (specify if different from 95% CI)  | Comments                                                                                                                                                                                                                                                                                                                               |
|-------------------------------|-----------------------------------|---------------------------|----------------------------------------------------------|---------------------------------------------------------------|-----------------------|----------|--------------------------------------------------------------------|-----------------------|---------------------------------------------------------|----------------------------------------------------------------------------------------------------------------------------------------------------------------------------------------------------------------------------------------------------------------------------------------------------------------------------------------|
| Cohort Studies                | Andersen, V. et al. 2013          | Denmark                   | 1977-2009                                                | C-section                                                     | 2672708               | BD       | Prenatal                                                           | 1.07                  | 1.02-1.12                                               | Adjusted for birth order, maternal age, gestational age, SGA, maternal IBD, paternal IBD, hospital admissions due to infection, maternal smoking, antibiotic treatment during pregnancy                                                                                                                                                |
|                               |                                   |                           |                                                          | C-section (boys)                                              | 1984758               | BD       | Prenatal                                                           | 1.11                  | 0.99-1.22                                               |                                                                                                                                                                                                                                                                                                                                        |
|                               |                                   |                           |                                                          | C-section (girls)                                             | 1584758               | BD       | Prenatal                                                           | 1.26 <sup>††</sup>    | 1.15-1.37                                               |                                                                                                                                                                                                                                                                                                                                        |
|                               | Aspeg, S. et al. 2006             | Sweden                    | 1987-2000                                                | Birth weight (< 2500g vs > 2500g)                             | 1479216               | BD       | Prenatal                                                           | 1.05                  | 0.95-1.12                                               | Adjusting variables not reported                                                                                                                                                                                                                                                                                                       |
|                               |                                   |                           |                                                          | Prematurity                                                   | 1479216               | BD       | Prenatal                                                           | 1.17 <sup>††</sup>    | 0.90-1.72                                               |                                                                                                                                                                                                                                                                                                                                        |
|                               | Bager, P. et al. 2012             | Denmark                   | 1995-2008                                                | C-section                                                     | 2098038               | BD       | Prenatal                                                           | 1.14 <sup>††</sup>    | 1.06-1.22                                               | Adjusted for age, calendar-year, sex, birth weight, birth order, and country of birth                                                                                                                                                                                                                                                  |
|                               |                                   |                           |                                                          | C-section                                                     | 40145                 | BD       | Prenatal                                                           | 0.92 <sup>††</sup>    | 0.43-1.96                                               |                                                                                                                                                                                                                                                                                                                                        |
|                               | Black, M. et al. 2015             | Scotland                  | 1993-2007                                                | C-section                                                     | 29206                 | BD       | Prenatal                                                           | 1.26                  | 0.92-1.75                                               | Adjusted for maternal age, gestation at birth, maternal Cancers diets, maternal smoking status, birth weight, year of delivery, male infant, and breastfeeding at 6 weeks                                                                                                                                                              |
|                               |                                   |                           |                                                          | C-section                                                     | 262729                | BD       | Prenatal                                                           | 1.07 <sup>††</sup>    | 0.92-1.42                                               |                                                                                                                                                                                                                                                                                                                                        |
|                               | Burnett, D. et al. 2017           | Canada                    | 1988-2014                                                | C-section                                                     | 262705                | BD       | Prenatal                                                           | 1 <sup>††</sup>       | 0.76-1.31                                               | Adjusted for maternal age, parity, area-level income, rural residence, smoking, weight status, and birth weight for gestational age                                                                                                                                                                                                    |
|                               |                                   |                           |                                                          | C-section (clinical cohort)                                   | 42906                 | BD       | Prenatal                                                           | 1.11 <sup>††</sup>    | 0.77-1.59                                               |                                                                                                                                                                                                                                                                                                                                        |
|                               | Burnett, D. et al. 2020           | Canada                    | 1988-2014                                                | C-section (clinical cohort)                                   | 262705                | BD       | Prenatal                                                           | 1.07 <sup>††</sup>    | 0.77-1.48                                               | Adjusted for maternal pre-pregnancy weight status, maternal age at birth, parity, Quintile of Annual Income per person equivalent (QAIPE), area of residence, and smoking during pregnancy                                                                                                                                             |
|                               |                                   |                           |                                                          | C-section (administrative cohort)                             | 42906                 | BD       | Prenatal                                                           | Not Reported          |                                                         |                                                                                                                                                                                                                                                                                                                                        |
|                               |                                   |                           |                                                          | C-section (small for gestational age) - clinical cohort       | 262705                | BD       | Prenatal                                                           | Not Reported          |                                                         |                                                                                                                                                                                                                                                                                                                                        |
|                               |                                   |                           |                                                          | C-section (small for gestational age) - administrative cohort | 42906                 | BD       | Prenatal                                                           | Not Significant       |                                                         |                                                                                                                                                                                                                                                                                                                                        |
|                               |                                   |                           |                                                          | C-section (large for gestational age) - clinical cohort       | 262705                | BD       | Prenatal                                                           | Not Significant       |                                                         |                                                                                                                                                                                                                                                                                                                                        |
|                               |                                   |                           |                                                          | C-section (large for gestational age) - administrative cohort | 42906                 | BD       | Prenatal                                                           | Not Significant       |                                                         |                                                                                                                                                                                                                                                                                                                                        |
|                               |                                   |                           |                                                          | C-section (large for gestational age) - administrative cohort | 2218758               | BD       | Prenatal                                                           | Not Significant       |                                                         |                                                                                                                                                                                                                                                                                                                                        |
|                               |                                   |                           |                                                          | C-section (large for gestational age) - administrative cohort | 2218758               | BD       | Prenatal                                                           | Not Significant       |                                                         |                                                                                                                                                                                                                                                                                                                                        |
|                               |                                   |                           |                                                          | C-section (large for gestational age) - administrative cohort | 2218758               | BD       | Prenatal                                                           | Not Significant       |                                                         |                                                                                                                                                                                                                                                                                                                                        |
|                               |                                   |                           |                                                          | C-section (large for gestational age) - administrative cohort | 2218758               | BD       | Prenatal                                                           | Not Significant       |                                                         |                                                                                                                                                                                                                                                                                                                                        |
|                               | Ellen, M. et al. 2020             | Canada                    | April 1st, 1991 to March 31st, 2014                      | Birth weight                                                  | 2218758               | BD       | Prenatal                                                           | Not Significant       | Not Significant                                         |                                                                                                                                                                                                                                                                                                                                        |
|                               |                                   |                           |                                                          | Prematurity                                                   | 2218758               | BD       | Prenatal                                                           | Not Significant       |                                                         |                                                                                                                                                                                                                                                                                                                                        |
|                               | Khalil, H. et al. 2013            | USA                       | 1991- June 1, 2007 (NHSII) and 1992- June 1, 2008 (NHSI) | Birth weight (2.3-3.175 vs < 2.26)                            | 143681                | CD       | Prenatal                                                           | 1.29 <sup>††</sup>    | 0.79-2.11                                               | Adjusted for age (months), cohort (NHSI vs. NHSII), BMI (<20, 20-24.5, 25-29.9, ≥ 30 kg/m2), smoking (never, past, current), history of diabetes in the mother (yes, no), maternal smoking during pregnancy (yes, no, unknown), ever use of oral contraceptives (yes, no), prematurity (yes, no), and having been breastfed (yes, no). |
|                               |                                   |                           |                                                          | Birth weight (2.3-3.175 vs 3.2-4.54)                          | 143681                | CD       | Prenatal                                                           | 1 <sup>††</sup>       | 0.74-1.34                                               |                                                                                                                                                                                                                                                                                                                                        |
|                               |                                   |                           |                                                          | Birth weight (2.3-3.175 vs > 4.54)                            | 143681                | CD       | Prenatal                                                           | 0.98 <sup>††</sup>    | 0.75-1.27                                               |                                                                                                                                                                                                                                                                                                                                        |
|                               |                                   |                           |                                                          | Birth weight (2.3-3.175 vs > 4.54)                            | 143681                | CD       | Prenatal                                                           | 1.06 <sup>††</sup>    | 0.71-1.58                                               |                                                                                                                                                                                                                                                                                                                                        |
|                               |                                   |                           |                                                          | Birth weight (2.3-3.175 vs > 4.54)                            | 143681                | CD       | Prenatal                                                           | 1.02 <sup>††</sup>    | 0.71-1.37                                               |                                                                                                                                                                                                                                                                                                                                        |
|                               |                                   |                           |                                                          | Prematurity                                                   | 143681                | CD       | Prenatal                                                           | 0.69 <sup>††</sup>    | 0.37-1.29                                               |                                                                                                                                                                                                                                                                                                                                        |
|                               |                                   |                           |                                                          | Prematurity                                                   | 143681                | CD       | Prenatal                                                           | 0.81 <sup>††</sup>    | 0.46-1.43                                               |                                                                                                                                                                                                                                                                                                                                        |
|                               | Konjeti, G. et al. 2013           | USA                       | 1976-2008                                                | Paternal age                                                  | 117976                | CD       | Prenatal                                                           | Not Significant       | Not Significant                                         |                                                                                                                                                                                                                                                                                                                                        |
|                               |                                   |                           |                                                          | C-section                                                     | 979 038               | CD       | Prenatal                                                           | 1.3 <sup>††</sup>     |                                                         | 0.9-1.8                                                                                                                                                                                                                                                                                                                                |
|                               | Lange, A. et al. 2014             | Denmark                   | 1995-2009                                                | C-section                                                     | 978 188               | CD       | Prenatal                                                           | 1.2 <sup>††</sup>     | 0.7-2.1                                                 | Unadjusted estimates reported                                                                                                                                                                                                                                                                                                          |
|                               |                                   |                           |                                                          | Prematurity                                                   | 768 840               | CD       | Prenatal                                                           | 1.49 <sup>††</sup>    | 1.11-2.39                                               |                                                                                                                                                                                                                                                                                                                                        |
|                               | Ponsonby, A.L. et al. 2009        | Australia                 | 1983-1998                                                | Electrolyte C-section                                         | 837 353               | CD       | Prenatal                                                           | 0.65 <sup>††</sup>    | 0.16-2.62                                               | Adjusted for sex, abnormality, interventional birth, urban, married, SES, maternal age, and year of birth                                                                                                                                                                                                                              |
|                               |                                   |                           |                                                          | Birth weight (< 1500 g vs 2500-3999g)                         | 875 767               | CD       | Prenatal                                                           | 0.68 <sup>††</sup>    | 0.36-1.28                                               |                                                                                                                                                                                                                                                                                                                                        |
|                               |                                   |                           |                                                          | Birth weight (1500-2499g vs 2500-3999g)                       | 942 028               | CD       | Prenatal                                                           | 0.87 <sup>††</sup>    | 0.59-1.28                                               |                                                                                                                                                                                                                                                                                                                                        |
|                               |                                   |                           |                                                          | Birth weight (> 4000g vs 2500-3999g)                          | 968877                | CD       | Prenatal                                                           | 0.44 <sup>††</sup>    | 0.17-1.22                                               |                                                                                                                                                                                                                                                                                                                                        |
|                               |                                   |                           |                                                          | Single vs multiple birth                                      | 934633                | CD       | Prenatal                                                           | 0.93 <sup>††</sup>    | 0.13-6.73                                               |                                                                                                                                                                                                                                                                                                                                        |
|                               |                                   |                           |                                                          | Prematurity (Gestational age > 37w vs < 37w)                  | 889889                | CD       | Prenatal                                                           | 0.88 <sup>††</sup>    | 0.53-1.46                                               |                                                                                                                                                                                                                                                                                                                                        |
|                               |                                   |                           |                                                          | Prematurity (Gestational age > 37w vs 28-36w)                 | 889889                | CD       | Prenatal                                                           | 0.94 <sup>††</sup>    | 0.72-1.19                                               |                                                                                                                                                                                                                                                                                                                                        |
|                               |                                   |                           |                                                          | Appar score (10 vs 9)                                         | 538147                | CD       | Prenatal                                                           | 1.04 <sup>††</sup>    | 0.67-1.62                                               |                                                                                                                                                                                                                                                                                                                                        |
|                               |                                   |                           |                                                          | Appar score (10 vs 5-8)                                       | 469091                | CD       | Prenatal                                                           | 0.64 <sup>††</sup>    | 0.09-4.58                                               |                                                                                                                                                                                                                                                                                                                                        |
|                               |                                   |                           |                                                          | Appar score (10 vs 0-4)                                       | 218804                | BD       | Prenatal                                                           | 1.23 <sup>††</sup>    | 1.14-1.33                                               |                                                                                                                                                                                                                                                                                                                                        |
|                               | Steiner, N. et al. 2019           | Southern Israel           | 1991-2014                                                | Birth weight (SGA < 5% centile for gestational age)           | 218804                | BD       | Prenatal                                                           | 1.23 <sup>††</sup>    | 1.14-1.33                                               | Adjusted for maternal age                                                                                                                                                                                                                                                                                                              |
| Case-Control Studies          | Ananthakrishnan, A.N. et al. 2015 | Boston                    | Not Reported                                             | C-section                                                     | 895                   | BD       | Prenatal                                                           | Not Significant       | Not Significant                                         |                                                                                                                                                                                                                                                                                                                                        |
|                               |                                   |                           |                                                          | C-section                                                     | 444                   | CD       | Prenatal                                                           | Not Reported          |                                                         |                                                                                                                                                                                                                                                                                                                                        |
|                               | Baron, S. et al. 2005             | Northern France           | 1988-1997                                                | Disease during pregnancy and risk of prematurity              | 12150                 | BD       | Prenatal                                                           | 4.67                  | 3.1-10.1                                                | Unadjusted estimates reported                                                                                                                                                                                                                                                                                                          |
|                               |                                   |                           |                                                          | C-section                                                     | 12150                 | BD       | Prenatal                                                           | 1.02 <sup>††</sup>    | 0.80-1.24                                               |                                                                                                                                                                                                                                                                                                                                        |
|                               | Bernstein, C.N. et al. 2016       | Canada                    | 1984-2010                                                | C-section                                                     | 6824                  | BD       | Prenatal                                                           | 1.06                  | 0.86-1.32                                               | Adjusted for urban vs rural residence and socioeconomic status (quintile)                                                                                                                                                                                                                                                              |
|                               |                                   |                           |                                                          | Birth weight                                                  | 6824                  | BD       | Prenatal                                                           | 1 <sup>††</sup>       | 1.1                                                     |                                                                                                                                                                                                                                                                                                                                        |
|                               | Bernstein, C.N. et al. 2019       | Canada                    | 1970-2010                                                | Birth weight                                                  | 6824                  | BD       | Prenatal                                                           | 1.08                  | 0.96-1.39                                               | Unadjusted estimates reported                                                                                                                                                                                                                                                                                                          |
|                               |                                   |                           |                                                          | Appar score 1 min (> 7 vs < 7)                                | 6824                  | CD       | Prenatal                                                           | 1.42                  | 1.02-1.96                                               |                                                                                                                                                                                                                                                                                                                                        |
|                               |                                   |                           |                                                          | Birth weight                                                  | 6824                  | BD       | Prenatal                                                           | 0.78                  | 0.55-1.11                                               |                                                                                                                                                                                                                                                                                                                                        |
|                               |                                   |                           |                                                          | Appar score 5 min (> 7 vs < 7)                                | 6824                  | CD       | Prenatal                                                           | 1.07                  | 0.49-2.33                                               |                                                                                                                                                                                                                                                                                                                                        |
|                               |                                   |                           |                                                          | Birth weight                                                  | 6824                  | BD       | Prenatal                                                           | 1.32                  | 0.38-4.61                                               |                                                                                                                                                                                                                                                                                                                                        |
|                               |                                   |                           |                                                          | Appar score 5 min (> 7 vs < 7)                                | 6824                  | CD       | Prenatal                                                           | 1.04                  | 0.37-2.89                                               |                                                                                                                                                                                                                                                                                                                                        |
|                               |                                   |                           |                                                          | Gestational age                                               | 6824                  | BD       | Prenatal                                                           | 1.004                 | 0.95-1.06                                               |                                                                                                                                                                                                                                                                                                                                        |
|                               | Canova, C. et al. 2020            | Italy                     | 1989-2012                                                | Single vs multiple birth                                      | 1804                  | BD       | Prenatal                                                           | 1.12                  | 0.42-3.00                                               | Adjusted for sex, year of birth, season of birth, having older sibling, number of births, birth weight, gestational age, Appar score at 1 minute, maternal age, and mother's education                                                                                                                                                 |
|                               |                                   |                           |                                                          | Gestational age (> 36 vs < 36)                                | 1804                  | BD       | Prenatal                                                           | 1.44 <sup>††</sup>    | 0.89-1.99                                               |                                                                                                                                                                                                                                                                                                                                        |
|                               | Decker, E. et al. 2010            | Germany                   | May 2008 and May 2009                                    | Appar score (> 7 vs < 7)                                      | 1712                  | BD       | Prenatal                                                           | 1.26                  | 0.40-4.03                                               | Unadjusted estimates reported                                                                                                                                                                                                                                                                                                          |
|                               |                                   |                           |                                                          | C-section                                                     | 912                   | CD       | Prenatal                                                           | 0.87                  | 0.55-1.38                                               |                                                                                                                                                                                                                                                                                                                                        |
|                               | Doyle, J.B. et al. 2017           | Northern Ireland          | 1971-1985                                                | C-section                                                     | 1117                  | CD       | Prenatal                                                           | 1.14                  | 0.63-1.58                                               | Unadjusted estimates reported                                                                                                                                                                                                                                                                                                          |
|                               |                                   |                           |                                                          | C-section                                                     | 6173                  | BD       | Prenatal                                                           | 0.85                  | 0.33-1.38                                               |                                                                                                                                                                                                                                                                                                                                        |
|                               | Ekborn, A. et al. 1990            | Sweden                    | 1924-1997                                                | Birth weight                                                  | 771                   | BD       | Prenatal                                                           | 4 <sup>††</sup>       | -99.78                                                  | Unadjusted estimates reported                                                                                                                                                                                                                                                                                                          |
|                               |                                   |                           |                                                          | Birth weight                                                  | 771                   | CD       | Prenatal                                                           | 19 <sup>††</sup>      | -89.138                                                 |                                                                                                                                                                                                                                                                                                                                        |
|                               |                                   |                           |                                                          | Birth weight                                                  | 771                   | CD       | Prenatal                                                           | 4 <sup>††</sup>       | -88.80                                                  |                                                                                                                                                                                                                                                                                                                                        |
|                               |                                   |                           |                                                          | Birth weight                                                  | 771                   | BD       | Prenatal                                                           | 0.5                   | 0.2-1.2                                                 |                                                                                                                                                                                                                                                                                                                                        |
|                               |                                   |                           |                                                          | Prematurity                                                   | 771                   | CD       | Prenatal                                                           | 0.7                   | 0.2-2.0                                                 |                                                                                                                                                                                                                                                                                                                                        |
|                               | Glat, T. et al. 1987              | 9 countries (Europe, USA) | Not Reported                                             | Birth weight                                                  | 1497                  | BD       | Prenatal                                                           | 0.4                   | 0.1-1.3                                                 | Not Reported                                                                                                                                                                                                                                                                                                                           |
|                               |                                   |                           |                                                          | Prematurity                                                   | 1497                  | BD       | Prenatal                                                           | Not Reported          |                                                         |                                                                                                                                                                                                                                                                                                                                        |
|                               | Huffless, S. et al. 2012          | Northern California       | 1996-2006                                                | C-section                                                     | 3269                  | BD       | Prenatal                                                           | 1.1 <sup>††</sup>     | 0.7-1.6                                                 | Adjusted for race, sex, maternal age, gestational hypertension, placental or amniotic infections, birth weight, gestational age                                                                                                                                                                                                        |
|                               |                                   |                           |                                                          | C-section                                                     | 3269                  | CD       | Prenatal                                                           | 1.3 <sup>††</sup>     | 0.7-2.4                                                 |                                                                                                                                                                                                                                                                                                                                        |
|                               |                                   |                           |                                                          | C-section                                                     | 3269                  | CD       | Prenatal                                                           | 0.7 <sup>††</sup>     | 0.4-1.4                                                 |                                                                                                                                                                                                                                                                                                                                        |
|                               |                                   |                           |                                                          | C-section                                                     | 3269                  | BD       | Prenatal                                                           | 1.6 <sup>††</sup>     | 0.7-10.4                                                |                                                                                                                                                                                                                                                                                                                                        |
|                               |                                   |                           |                                                          | Birth weight (< 2500g)                                        | 3269                  | CD       | Prenatal                                                           | 2.7 <sup>††</sup>     | 0.7-1.6                                                 |                                                                                                                                                                                                                                                                                                                                        |
|                               |                                   |                           |                                                          | Birth weight (< 2500g)                                        | 3269                  | CD       | Prenatal                                                           | 1.6 <sup>††</sup>     | 0.5-5.1                                                 |                                                                                                                                                                                                                                                                                                                                        |
|                               |                                   |                           |                                                          | Gestational age (> 37 vs < 36w)                               | 3269                  | BD       | Prenatal                                                           | 0.6                   | 0.3-1.5                                                 |                                                                                                                                                                                                                                                                                                                                        |
|                               | Klein, I. et al. 1998             | Israel                    | 1992-1993                                                | Birth weight                                                  | 169                   | CD       | Prenatal                                                           | 0.4                   | 0.1-1.6                                                 | Not Significant                                                                                                                                                                                                                                                                                                                        |
|                               |                                   |                           |                                                          | Birth weight                                                  | 177                   | CD       | Prenatal                                                           | Not Significant       |                                                         |                                                                                                                                                                                                                                                                                                                                        |
|                               | Levy, L.C. et al. 2012            | US cohort                 | Not Reported                                             | C-section                                                     | 1458                  | BD       | Prenatal                                                           | Not Reported          | Not Reported                                            |                                                                                                                                                                                                                                                                                                                                        |
|                               |                                   |                           |                                                          | C-section                                                     | 16979                 | CD       | Prenatal                                                           | 1.14                  |                                                         | 0.97-1.34                                                                                                                                                                                                                                                                                                                              |
|                               | Naimborg, P. et al. 2012          | Sweden                    | 1973-2006                                                | Birth weight (< 1500 g)                                       | 16967                 | CD       | Prenatal                                                           | Not Reported          | Adjusted for maternal infection and socioeconomic index |                                                                                                                                                                                                                                                                                                                                        |
|                               |                                   |                           |                                                          | Birth weight (1500-2499g)                                     | 16863                 | CD       | Prenatal                                                           | Not Reported          |                                                         |                                                                                                                                                                                                                                                                                                                                        |
|                               | Radon, K. et al. 2007             | Germany                   | March 2006 and August 2006                               | Birth weight (< 2500g)                                        | 1925                  | CD       | Prenatal                                                           | 0.5 <sup>††</sup>     | 0.4-0.7                                                 | Adjusted for age, gender, region, and parental education and mutually adjusted for parental IBD, male gender, nutrition other than breast milk < 5 mo, maternal smoking, ≥ 2 siblings, twins, living in urban area                                                                                                                     |
|                               |                                   |                           |                                                          | C-section                                                     | 1788                  | CD       | Prenatal                                                           | 0.5 <sup>††</sup>     | 0.3-0.8                                                 |                                                                                                                                                                                                                                                                                                                                        |
|                               | Somnag, B. et al. 2007            | Germany                   | January 2003 and March 2004                              | C-section                                                     | 1974                  | CD       | Prenatal                                                           | 1.45                  | 0.96-2.19                                               | Unadjusted estimates reported                                                                                                                                                                                                                                                                                                          |
|                               |                                   |                           |                                                          | Birth weight                                                  | 1641                  | CD       | Prenatal                                                           | 1.31 <sup>††</sup>    | 0.83-2.01                                               |                                                                                                                                                                                                                                                                                                                                        |
|                               | Thompson, N.P. et al. 1995        | England                   | 1910-1968                                                | Birth weight                                                  | 1641                  | CD       | Prenatal                                                           | 1.52                  | 1.12-2.07                                               | Adjusted for disease during 1st year, pregnancy diseases, maternal IBD, appendectomy, ever smoking, sex                                                                                                                                                                                                                                |
|                               |                                   |                           |                                                          | Proterm birth                                                 | 1641                  | CD       | Prenatal                                                           | 0.94 <sup>††</sup>    | 0.842-1.379                                             |                                                                                                                                                                                                                                                                                                                                        |
| Thorsen, S.U. et al. 2016     | Denmark                           | 1981-2004                 | Birth weight                                             | 2522                                                          | BD                    | Prenatal | Not Significant                                                    | Not Significant       |                                                         |                                                                                                                                                                                                                                                                                                                                        |
|                               |                                   |                           | Prematurity                                              | 2522                                                          | CD                    | Prenatal | 1.1 <sup>††</sup>                                                  |                       | 0.95-1.48                                               |                                                                                                                                                                                                                                                                                                                                        |
| van der Stoep, K. et al. 2020 | Netherlands                       | Not Reported              | Birth weight                                             | 2522                                                          | CD                    | Prenatal | 1.36 <sup>††</sup>                                                 | 0.96-1.86             | Unadjusted estimates reported                           |                                                                                                                                                                                                                                                                                                                                        |
|                               |                                   |                           | Birth weight < 2500 compared with 2500-4499 g            | 384                                                           | BD                    | Prenatal | 1.21 <sup>††</sup>                                                 | 0.92-2.48             |                                                         |                                                                                                                                                                                                                                                                                                                                        |
|                               |                                   |                           | Birth weight 24500 compared with 2500-4499 g             | 384                                                           | BD                    | Prenatal | 0.42 <sup>††</sup>                                                 | 0.13-1.41             |                                                         |                                                                                                                                                                                                                                                                                                                                        |
|                               |                                   |                           | Gestational age < 37 compared with 37-41.99 weeks        | 384                                                           | BD                    | Prenatal | 0.84 <sup>††</sup>                                                 | 0.35-2.01             |                                                         |                                                                                                                                                                                                                                                                                                                                        |
|                               |                                   |                           | Gestational age < 42 compared with 37-41.99 weeks        | 384                                                           | BD                    | Prenatal | 1.37 <sup>††</sup>                                                 | 0.82-2.31             |                                                         |                                                                                                                                                                                                                                                                                                                                        |
| Velosa, M. et al. 2019        | Israel                            | 1964-1976                 | C-section                                                | 1671                                                          | CD                    | Prenatal | 0.64                                                               | 0.32-1.32             | Unadjusted estimates reported                           |                                                                                                                                                                                                                                                                                                                                        |
|                               |                                   |                           | C-section                                                | 1699                                                          | CD                    | Prenatal | 1.01                                                               | 0.53-1.92             |                                                         |                                                                                                                                                                                                                                                                                                                                        |
|                               |                                   |                           | Birth weight (low vs medium)                             | 1671                                                          | CD                    | Prenatal | 0.96                                                               | 0.67-1.45             |                                                         |                                                                                                                                                                                                                                                                                                                                        |
|                               |                                   |                           | Birth weight (low vs high)                               | 1699                                                          | CD                    | Prenatal | 1.06                                                               | 0.73-1.54             |                                                         |                                                                                                                                                                                                                                                                                                                                        |
|                               |                                   |                           | Birth weight (low vs high)                               | 1671                                                          | CD                    | Prenatal | 0.77                                                               | 0.52-1.15             |                                                         |                                                                                                                                                                                                                                                                                                                                        |
| Velosa, M. et al. 2019        | Israel                            | 1964-1976                 | C-section                                                | 1699                                                          | CD                    | Prenatal | 0.82                                                               | 0.55-1.20             | Not Reported                                            |                                                                                                                                                                                                                                                                                                                                        |
|                               |                                   |                           | C-section                                                | 1744                                                          | BD                    | Prenatal | Not Reported                                                       |                       |                                                         |                                                                                                                                                                                                                                                                                                                                        |
| Velosa, M. et al. 2019        | Israel                            | 1964-1976                 | Birth weight                                             | 1744                                                          | BD                    | Prenatal | Not Reported                                                       | Not Reported          |                                                         |                                                                                                                                                                                                                                                                                                                                        |
|                               |                                   |                           | Birth weight                                             | 1744                                                          | BD                    | Prenatal | Not Reported                                                       |                       |                                                         |                                                                                                                                                                                                                                                                                                                                        |



| Study type                    | Study               | Study location                                     | Study Time Period                             | Exposure Description | Total sample size (n)   | Outcome   | Period of exposure                                                                            | Effect estimate value                                                                             | Confidence interval (specify if different from 95% CI)                                                                                                                                                                                                                                                | Comments                      |       |                   |           |                                                                                                                                                                                                                                                                                                       |
|-------------------------------|---------------------|----------------------------------------------------|-----------------------------------------------|----------------------|-------------------------|-----------|-----------------------------------------------------------------------------------------------|---------------------------------------------------------------------------------------------------|-------------------------------------------------------------------------------------------------------------------------------------------------------------------------------------------------------------------------------------------------------------------------------------------------------|-------------------------------|-------|-------------------|-----------|-------------------------------------------------------------------------------------------------------------------------------------------------------------------------------------------------------------------------------------------------------------------------------------------------------|
| <b>Cohort studies</b>         |                     |                                                    |                                               |                      |                         |           |                                                                                               |                                                                                                   |                                                                                                                                                                                                                                                                                                       |                               |       |                   |           |                                                                                                                                                                                                                                                                                                       |
| Chowers, Y et al. 2004        | Israel              | Not Reported                                       | Month of birth January                        |                      | 844                     | CD        | Birth                                                                                         | 2 <sup>a</sup>                                                                                    | 1.37-2.4                                                                                                                                                                                                                                                                                              | Unadjusted estimates reported |       |                   |           |                                                                                                                                                                                                                                                                                                       |
|                               |                     |                                                    |                                               |                      | 844                     | UC        | Birth                                                                                         | 1.21 <sup>a</sup>                                                                                 | 0.76-1.65                                                                                                                                                                                                                                                                                             | Unadjusted estimates reported |       |                   |           |                                                                                                                                                                                                                                                                                                       |
|                               |                     |                                                    |                                               |                      | 844                     | CD        | Birth                                                                                         | 1.26 <sup>a</sup>                                                                                 | 1.11-2.13                                                                                                                                                                                                                                                                                             | Unadjusted estimates reported |       |                   |           |                                                                                                                                                                                                                                                                                                       |
|                               |                     |                                                    |                                               |                      | 844                     | UC        | Birth                                                                                         | 0.69 <sup>a</sup>                                                                                 | 0.33-1.05                                                                                                                                                                                                                                                                                             | Unadjusted estimates reported |       |                   |           |                                                                                                                                                                                                                                                                                                       |
|                               |                     |                                                    |                                               |                      | 844                     | CD        | Birth                                                                                         | 0.61 <sup>a</sup>                                                                                 | 0.24-0.82                                                                                                                                                                                                                                                                                             | Unadjusted estimates reported |       |                   |           |                                                                                                                                                                                                                                                                                                       |
|                               |                     |                                                    |                                               |                      | 844                     | UC        | Birth                                                                                         | 1.12 <sup>a</sup>                                                                                 | 0.66-1.58                                                                                                                                                                                                                                                                                             | Unadjusted estimates reported |       |                   |           |                                                                                                                                                                                                                                                                                                       |
|                               |                     |                                                    |                                               |                      | 844                     | CD        | Birth                                                                                         | 0.68 <sup>a</sup>                                                                                 | 0.30-0.90                                                                                                                                                                                                                                                                                             | Unadjusted estimates reported |       |                   |           |                                                                                                                                                                                                                                                                                                       |
|                               |                     |                                                    |                                               |                      | 844                     | UC        | Birth                                                                                         | 1.37 <sup>a</sup>                                                                                 | 0.87-1.87                                                                                                                                                                                                                                                                                             | Unadjusted estimates reported |       |                   |           |                                                                                                                                                                                                                                                                                                       |
|                               |                     |                                                    |                                               |                      | 844                     | CD        | Birth                                                                                         | 1.23 <sup>a</sup>                                                                                 | 1.04-1.98                                                                                                                                                                                                                                                                                             | Unadjusted estimates reported |       |                   |           |                                                                                                                                                                                                                                                                                                       |
|                               |                     |                                                    |                                               |                      | 844                     | UC        | Birth                                                                                         | 0.9 <sup>a</sup>                                                                                  | 0.50-1.29                                                                                                                                                                                                                                                                                             | Unadjusted estimates reported |       |                   |           |                                                                                                                                                                                                                                                                                                       |
|                               |                     |                                                    |                                               |                      | 844                     | CD        | Birth                                                                                         | 1.18 <sup>a</sup>                                                                                 | 1.07-1.99                                                                                                                                                                                                                                                                                             | Unadjusted estimates reported |       |                   |           |                                                                                                                                                                                                                                                                                                       |
|                               |                     |                                                    |                                               |                      | 844                     | UC        | Birth                                                                                         | 1.02 <sup>a</sup>                                                                                 | 0.61-1.42                                                                                                                                                                                                                                                                                             | Unadjusted estimates reported |       |                   |           |                                                                                                                                                                                                                                                                                                       |
|                               |                     |                                                    |                                               |                      | Khalili, H. et al. 2012 | USA       | BD diagnosis between June 1976 to June 2002 (NHS I), between June 1989 to June 2003 in NHS II | Residence at Southern latitude (south of 37° N) compared with Northern (north of north of 41-42°) | 844                                                                                                                                                                                                                                                                                                   | CD                            | Birth | 1.02 <sup>b</sup> | 0.66-1.58 | Adjusted for age (Month), body mass index (<21, 21e24.9, 25e29.9, 30 kg/m2), ancestry (Southern European, Scandinavian, other Caucasian, non-white), oral contraceptive use (never, past, current), hormonal replacement therapy (never, past, current, premenopause), smoking (never, past, present) |
|                               |                     |                                                    |                                               |                      |                         |           |                                                                                               |                                                                                                   | 844                                                                                                                                                                                                                                                                                                   | UC                            | Birth | 1.02 <sup>b</sup> | 0.80-1.29 | Adjusted for age (Month), body mass index (<21, 21e24.9, 25e29.9, 30 kg/m2), ancestry (Southern European, Scandinavian, other Caucasian, non-white), oral contraceptive use (never, past, current), hormonal replacement therapy (never, past, current, premenopause), smoking (never, past, present) |
| 844                           | CD                  | Birth                                              | 0.93 <sup>b</sup>                             | 0.70-1.19            |                         |           |                                                                                               |                                                                                                   | Adjusted for age (Month), body mass index (<21, 21e24.9, 25e29.9, 30 kg/m2), ancestry (Southern European, Scandinavian, other Caucasian, non-white), oral contraceptive use (never, past, current), hormonal replacement therapy (never, past, current, premenopause), smoking (never, past, present) |                               |       |                   |           |                                                                                                                                                                                                                                                                                                       |
| 844                           | UC                  | Birth                                              | 0.69 <sup>b</sup>                             | 0.44-1.07            |                         |           |                                                                                               |                                                                                                   | Adjusted for age (Month), body mass index (<21, 21e24.9, 25e29.9, 30 kg/m2), ancestry (Southern European, Scandinavian, other Caucasian, non-white), oral contraceptive use (never, past, current), hormonal replacement therapy (never, past, current, premenopause), smoking (never, past, present) |                               |       |                   |           |                                                                                                                                                                                                                                                                                                       |
| Sonnenberg, A. et al. 2009    | England             | Born between April 1997 and March 2006             | Seasonality/Month of birth                    | 54927510             | BD                      | Birth     |                                                                                               | Not reported                                                                                      |                                                                                                                                                                                                                                                                                                       |                               |       |                   |           |                                                                                                                                                                                                                                                                                                       |
|                               |                     |                                                    |                                               | 54927510             | CD                      | Birth     |                                                                                               | Not reported                                                                                      |                                                                                                                                                                                                                                                                                                       |                               |       |                   |           |                                                                                                                                                                                                                                                                                                       |
|                               |                     |                                                    |                                               | 54927510             | UC                      | Birth     |                                                                                               | Not reported                                                                                      |                                                                                                                                                                                                                                                                                                       |                               |       |                   |           |                                                                                                                                                                                                                                                                                                       |
| Ponsonby A.L. et al. 2009     | Victoria, Australia | Born between 1983-1998                             | Spring birth compared with others             | 253500               | CD                      | Birth     | 0.99 <sup>b</sup>                                                                             | 0.75-1.30                                                                                         | Adjusting variables not reported                                                                                                                                                                                                                                                                      |                               |       |                   |           |                                                                                                                                                                                                                                                                                                       |
| Card T.R. et al. 2002         | England             | 1978-1998                                          | Month of birth October                        | 15710000             | BD                      | Birth     |                                                                                               | Not significant                                                                                   |                                                                                                                                                                                                                                                                                                       |                               |       |                   |           |                                                                                                                                                                                                                                                                                                       |
|                               |                     |                                                    |                                               | 15710000             | CD                      | Birth     |                                                                                               | Not significant                                                                                   |                                                                                                                                                                                                                                                                                                       |                               |       |                   |           |                                                                                                                                                                                                                                                                                                       |
|                               |                     |                                                    |                                               | 15710000             | UC                      | Birth     |                                                                                               | Not significant                                                                                   |                                                                                                                                                                                                                                                                                                       |                               |       |                   |           |                                                                                                                                                                                                                                                                                                       |
| Ekbom, A. et al. 1991         | Sweden              | 1924-1957                                          | Spring Birth compared with others             | 610655               | CD                      | Birth     |                                                                                               | Not reported                                                                                      |                                                                                                                                                                                                                                                                                                       |                               |       |                   |           |                                                                                                                                                                                                                                                                                                       |
|                               |                     |                                                    |                                               | 610655               | UC                      | Birth     |                                                                                               | Not reported                                                                                      |                                                                                                                                                                                                                                                                                                       |                               |       |                   |           |                                                                                                                                                                                                                                                                                                       |
| <b>Case-control studies</b>   |                     |                                                    |                                               |                      |                         |           |                                                                                               |                                                                                                   |                                                                                                                                                                                                                                                                                                       |                               |       |                   |           |                                                                                                                                                                                                                                                                                                       |
| Shaw, S.Y. et al. 2014        | Canada              | 1984 to 2010                                       | Season of birth: January-March                | 119 786              | BD                      | Birth     | 0.98 <sup>c</sup>                                                                             | 0.99-1.02                                                                                         | Unadjusted estimates reported                                                                                                                                                                                                                                                                         |                               |       |                   |           |                                                                                                                                                                                                                                                                                                       |
|                               |                     |                                                    |                                               | 119 786              | BD                      | Birth     | 1.07 <sup>c</sup>                                                                             | 1.02-1.12                                                                                         | Unadjusted estimates reported                                                                                                                                                                                                                                                                         |                               |       |                   |           |                                                                                                                                                                                                                                                                                                       |
|                               |                     |                                                    |                                               | 119 786              | BD                      | Birth     | 0.95 <sup>c</sup>                                                                             | 0.91-1.00                                                                                         | Unadjusted estimates reported                                                                                                                                                                                                                                                                         |                               |       |                   |           |                                                                                                                                                                                                                                                                                                       |
|                               |                     |                                                    |                                               | 119 786              | BD                      | Birth     | 1.01 <sup>c</sup>                                                                             | 0.96-1.05                                                                                         | Unadjusted estimates reported                                                                                                                                                                                                                                                                         |                               |       |                   |           |                                                                                                                                                                                                                                                                                                       |
| Haslam, N. et al. 2000        | UK                  | Diagnosed with CD between 1972 and 1989            | Month of birth: January-June                  | Controls NR, 928     | BD                      | CD        | Birth                                                                                         | 1.14 <sup>d</sup>                                                                                 | 1.01-1.30                                                                                                                                                                                                                                                                                             | Unadjusted estimates reported |       |                   |           |                                                                                                                                                                                                                                                                                                       |
|                               |                     |                                                    |                                               | Controls NR, 928     | BD                      | CD        | Birth                                                                                         | 0.98 <sup>d</sup>                                                                                 | 0.84-1.14                                                                                                                                                                                                                                                                                             | Unadjusted estimates reported |       |                   |           |                                                                                                                                                                                                                                                                                                       |
| Holmes, E.A. et al. 2019      | Australia           | 2010-2013                                          | Sun exposure in Summer                        | 495                  | BD                      | 0-2 years | 1 <sup>e</sup>                                                                                | 0.68-1.49                                                                                         | Unadjusted estimates reported                                                                                                                                                                                                                                                                         |                               |       |                   |           |                                                                                                                                                                                                                                                                                                       |
|                               |                     |                                                    |                                               | 495                  | BD                      | 3-5 years | 0.8 <sup>e</sup>                                                                              | 0.53-1.22                                                                                         | Unadjusted estimates reported                                                                                                                                                                                                                                                                         |                               |       |                   |           |                                                                                                                                                                                                                                                                                                       |
|                               |                     |                                                    |                                               | 495                  | BD                      | 0-2 years | 1 <sup>e</sup>                                                                                | 0.66-1.51                                                                                         | Unadjusted estimates reported                                                                                                                                                                                                                                                                         |                               |       |                   |           |                                                                                                                                                                                                                                                                                                       |
|                               |                     |                                                    |                                               | 495                  | BD                      | 3-5 years | 0.7 <sup>e</sup>                                                                              | 0.44-1.10                                                                                         | Unadjusted estimates reported                                                                                                                                                                                                                                                                         |                               |       |                   |           |                                                                                                                                                                                                                                                                                                       |
| Thorsen, S.U. et al. 2016     | Denmark             | Born between 1981-2004                             | Perinatal Vitamin D                           | 768                  | BD                      | Perinatal | 1.12 <sup>f</sup>                                                                             | 0.88-1.42                                                                                         | Variables adjusted for: 25(OH)D, gender, ethni-city, birth weight (categorical), gestational age (categorical) and mother's age (categorical)                                                                                                                                                         |                               |       |                   |           |                                                                                                                                                                                                                                                                                                       |
| Van Ranst, M. et al. 2005     | Belgium             | Born between January 1, 1935 and December 31, 1990 | Seasonality/Month of birth                    | 6 150                | CD                      | Birth     | 0.64 <sup>g</sup>                                                                             | 0.45-0.91                                                                                         | Unadjusted estimates reported                                                                                                                                                                                                                                                                         |                               |       |                   |           |                                                                                                                                                                                                                                                                                                       |
| Lopez-Serrano, P. et al. 2010 | Spain               | 2004                                               | Season of birth- Winter                       | 359                  | CD                      | Birth     | 1.2 <sup>h</sup>                                                                              | 0.2-3.2                                                                                           | Unadjusted estimates reported                                                                                                                                                                                                                                                                         |                               |       |                   |           |                                                                                                                                                                                                                                                                                                       |
|                               |                     |                                                    |                                               | 424                  | UC                      | Birth     | 1.2 <sup>h</sup>                                                                              | 0.3-2.8                                                                                           | Unadjusted estimates reported                                                                                                                                                                                                                                                                         |                               |       |                   |           |                                                                                                                                                                                                                                                                                                       |
|                               |                     |                                                    |                                               | 359                  | CD                      | Birth     | 0.8 <sup>h</sup>                                                                              | 0.3-3.4                                                                                           | Unadjusted estimates reported                                                                                                                                                                                                                                                                         |                               |       |                   |           |                                                                                                                                                                                                                                                                                                       |
|                               |                     |                                                    |                                               | 424                  | UC                      | Birth     | 0.8 <sup>h</sup>                                                                              | 0.3-2.4                                                                                           | Unadjusted estimates reported                                                                                                                                                                                                                                                                         |                               |       |                   |           |                                                                                                                                                                                                                                                                                                       |
|                               |                     |                                                    |                                               | 359                  | CD                      | Birth     | 0.9 <sup>h</sup>                                                                              | 0.5-2.8                                                                                           | Unadjusted estimates reported                                                                                                                                                                                                                                                                         |                               |       |                   |           |                                                                                                                                                                                                                                                                                                       |
|                               |                     |                                                    |                                               | 424                  | UC                      | Birth     | 1 <sup>h</sup>                                                                                | 0.5-3.4                                                                                           | Unadjusted estimates reported                                                                                                                                                                                                                                                                         |                               |       |                   |           |                                                                                                                                                                                                                                                                                                       |
|                               |                     |                                                    |                                               | 359                  | CD                      | Birth     | 0.9 <sup>h</sup>                                                                              | 0.5-2.8                                                                                           | Unadjusted estimates reported                                                                                                                                                                                                                                                                         |                               |       |                   |           |                                                                                                                                                                                                                                                                                                       |
|                               |                     |                                                    |                                               | 424                  | UC                      | Birth     | 1 <sup>h</sup>                                                                                | 0.5-3.4                                                                                           | Unadjusted estimates reported                                                                                                                                                                                                                                                                         |                               |       |                   |           |                                                                                                                                                                                                                                                                                                       |
| Disanto, G. et al. 201        | Scotland, England   | 1997 to 2009                                       | Month of birth January                        | 32 275 977           | CD                      | Birth     | 1.06 <sup>i</sup>                                                                             | 1.01-1.11                                                                                         | Unadjusted estimates reported                                                                                                                                                                                                                                                                         |                               |       |                   |           |                                                                                                                                                                                                                                                                                                       |
|                               |                     |                                                    |                                               | 32 275 977           | UC                      | Birth     | 1.04 <sup>i</sup>                                                                             | 0.99-1.09                                                                                         | Unadjusted estimates reported                                                                                                                                                                                                                                                                         |                               |       |                   |           |                                                                                                                                                                                                                                                                                                       |
|                               |                     |                                                    |                                               | 32 275 977           | CD                      | Birth     | 0.96 <sup>i</sup>                                                                             | 0.91-1.01                                                                                         | Unadjusted estimates reported                                                                                                                                                                                                                                                                         |                               |       |                   |           |                                                                                                                                                                                                                                                                                                       |
|                               |                     |                                                    |                                               | 32 275 977           | UC                      | Birth     | 1.06 <sup>i</sup>                                                                             | 1.02-1.11                                                                                         | Unadjusted estimates reported                                                                                                                                                                                                                                                                         |                               |       |                   |           |                                                                                                                                                                                                                                                                                                       |
|                               |                     |                                                    |                                               | 32 275 977           | CD                      | Birth     | 1.04 <sup>i</sup>                                                                             | 0.99-1.10                                                                                         | Unadjusted estimates reported                                                                                                                                                                                                                                                                         |                               |       |                   |           |                                                                                                                                                                                                                                                                                                       |
|                               |                     |                                                    |                                               | 32 275 977           | UC                      | Birth     | 0.97 <sup>i</sup>                                                                             | 0.93-1.02                                                                                         | Unadjusted estimates reported                                                                                                                                                                                                                                                                         |                               |       |                   |           |                                                                                                                                                                                                                                                                                                       |
|                               |                     |                                                    |                                               | 32 275 977           | CD                      | Birth     | 0.92 <sup>i</sup>                                                                             | 0.87-0.97                                                                                         | Unadjusted estimates reported                                                                                                                                                                                                                                                                         |                               |       |                   |           |                                                                                                                                                                                                                                                                                                       |
|                               |                     |                                                    |                                               | 32 275 977           | UC                      | Birth     | 0.93 <sup>i</sup>                                                                             | 0.88-0.97                                                                                         | Unadjusted estimates reported                                                                                                                                                                                                                                                                         |                               |       |                   |           |                                                                                                                                                                                                                                                                                                       |
| Lee, J. et al. 2020           | South Korea         | January 1997 and August 2015                       | Birth Month                                   | 17 246 154           | CD                      | Birth     | 1.04 <sup>j</sup>                                                                             | 1.009-1.076                                                                                       | Unadjusted estimates reported                                                                                                                                                                                                                                                                         |                               |       |                   |           |                                                                                                                                                                                                                                                                                                       |
|                               |                     |                                                    |                                               | 17 246 154           | UC                      | Birth     | 1.032 <sup>j</sup>                                                                            | 1.011-1.053                                                                                       | Unadjusted estimates reported                                                                                                                                                                                                                                                                         |                               |       |                   |           |                                                                                                                                                                                                                                                                                                       |
| Canova, C. et al. 2020        | Italy               | Born between 1982 and 2012                         | Birth season (October-April vs May-September) | 1 804                | BD                      | Birth     | 1.19 <sup>k</sup>                                                                             | 0.86-1.65                                                                                         | Adjusted for sex, year of birth, season of birth, having older siblings, number of births, birth weight, gestational age, Apgar score at 1 minute, maternal age and mother's education                                                                                                                |                               |       |                   |           |                                                                                                                                                                                                                                                                                                       |

| Study type                  | Study                         | Study location | Study Time Period         | Exposure Description                                 | Total sample size (n)    | Outcome                  | Period of exposure                                    | Effect estimate type (odds ratio, relative risk, rate ratio etc) | Effect estimate value | Confidence interval (specify if different from 95% CI)     | p-value                                                                                                                                                                                                                                                                                                                                              | Comments                                                                                                                                                                                                  |
|-----------------------------|-------------------------------|----------------|---------------------------|------------------------------------------------------|--------------------------|--------------------------|-------------------------------------------------------|------------------------------------------------------------------|-----------------------|------------------------------------------------------------|------------------------------------------------------------------------------------------------------------------------------------------------------------------------------------------------------------------------------------------------------------------------------------------------------------------------------------------------------|-----------------------------------------------------------------------------------------------------------------------------------------------------------------------------------------------------------|
| Cohort Studies              | Shahri, H. et al. 2013        | Boston, USA    | 1976-2008                 | Breastfeeding (any/no)                               | 167626 person-years      | CD                       | Infancy                                               | MV-adjusted HR                                                   | 0.99 <sup>†</sup>     | 0.76-1.30                                                  | NS                                                                                                                                                                                                                                                                                                                                                   | Adjusted for smoking, BMI, birthweight, preterm birth, history of diabetes in the mother, maternal history of smoking during pregnancy and oral contraceptive use.                                        |
|                             |                               |                |                           |                                                      | 167626 person-years      | UC                       | Infancy                                               | MV-adjusted HR                                                   | 1.01 <sup>†</sup>     | 0.81-1.23                                                  | NS                                                                                                                                                                                                                                                                                                                                                   | Adjusted for smoking, BMI, birthweight, preterm birth, history of diabetes in the mother, maternal history of smoking during pregnancy and oral contraceptive use.                                        |
|                             |                               |                |                           |                                                      | 167626 person-years      | CD                       | Infancy                                               | MV-adjusted HR                                                   | 1.26 <sup>†</sup>     | 0.83-1.93                                                  | NS                                                                                                                                                                                                                                                                                                                                                   | Adjusted for smoking, BMI, birthweight, preterm birth, history of diabetes in the mother, maternal history of smoking during pregnancy and oral contraceptive use.                                        |
|                             |                               |                |                           | Breastfed 13 months (compared with no breastfeeding) | 167626 person-years      | UC                       | Infancy                                               | MV-adjusted HR                                                   | 1.09 <sup>†</sup>     | 0.71-1.72                                                  | NS                                                                                                                                                                                                                                                                                                                                                   | Adjusted for smoking, BMI, birthweight, preterm birth, history of diabetes in the mother, maternal history of smoking during pregnancy and oral contraceptive use.                                        |
|                             |                               |                |                           |                                                      | 167626 person-years      | CD                       | Infancy                                               | MV-adjusted HR                                                   | 0.94 <sup>†</sup>     | 0.66-1.32                                                  | NS                                                                                                                                                                                                                                                                                                                                                   | Adjusted for smoking, BMI, birthweight, preterm birth, history of diabetes in the mother, maternal history of smoking during pregnancy and oral contraceptive use.                                        |
|                             |                               |                |                           | Breastfed 4-8 mos (compared with no breastfeeding)   | 167626 person-years      | UC                       | Infancy                                               | MV-adjusted HR                                                   | 0.97 <sup>†</sup>     | 0.65-1.46                                                  | NS                                                                                                                                                                                                                                                                                                                                                   | Adjusted for smoking, BMI, birthweight, preterm birth, history of diabetes in the mother, maternal history of smoking during pregnancy and oral contraceptive use.                                        |
|                             |                               |                |                           |                                                      | 167626 person-years      | CD                       | Infancy                                               | MV-adjusted HR                                                   | 1.02 <sup>†</sup>     | 0.63-1.66                                                  | NS                                                                                                                                                                                                                                                                                                                                                   | Adjusted for smoking, BMI, birthweight, preterm birth, history of diabetes in the mother, maternal history of smoking during pregnancy and oral contraceptive use.                                        |
|                             |                               |                |                           | Breastfed ≥9 months (compared with no breastfeeding) | 167626 person-years      | UC                       | Infancy                                               | MV-adjusted HR                                                   | 0.90 <sup>†</sup>     | 0.56-1.46                                                  | NS                                                                                                                                                                                                                                                                                                                                                   | Adjusted for smoking, BMI, birthweight, preterm birth, history of diabetes in the mother, maternal history of smoking during pregnancy and oral contraceptive use.                                        |
|                             |                               |                |                           |                                                      | 167626 person-years      | CD                       | Infancy                                               | MV-adjusted HR                                                   | 1.09 <sup>†</sup>     | 0.84-1.41                                                  | NS                                                                                                                                                                                                                                                                                                                                                   | Adjusted for maternal age, parity, area-level income, rural residence, smoking, weight status, and birth weight for gestational age.                                                                      |
|                             |                               |                |                           |                                                      | 262 729                  | IBD                      | adH                                                   | 1.09 <sup>†</sup>                                                |                       |                                                            |                                                                                                                                                                                                                                                                                                                                                      |                                                                                                                                                                                                           |
|                             |                               |                |                           |                                                      |                          |                          |                                                       |                                                                  |                       |                                                            |                                                                                                                                                                                                                                                                                                                                                      |                                                                                                                                                                                                           |
|                             |                               |                |                           | Case-Control Studies                                 | Skirry, R.B. et al. 2010 | Canterbury, New Zealand  | June 2003 to May 2005                                 | Breastfeeding                                                    | 1238                  | CD                                                         | Infancy                                                                                                                                                                                                                                                                                                                                              | aOR                                                                                                                                                                                                       |
|                             | 1253                          | UC             | Infancy                   |                                                      |                          |                          |                                                       | aOR                                                              | 0.71 <sup>†</sup>     | 0.52-0.96                                                  | Not reported                                                                                                                                                                                                                                                                                                                                         | Adjusted for family history of IBD, smoking, age at recruitment, social class at birth, ethnic identity and sex; Bf significant when ≥3 months                                                            |
|                             | 607                           | CD             | Infancy                   |                                                      |                          |                          |                                                       | crude OR                                                         | 1 <sup>†</sup>        | 0.5-2.2                                                    | Not reported                                                                                                                                                                                                                                                                                                                                         | Unadjusted estimates reported                                                                                                                                                                             |
|                             | 678                           | UC             | Infancy                   |                                                      |                          |                          |                                                       | crude OR                                                         | 0.8 <sup>†</sup>      | 0.5-1.4                                                    | Not reported                                                                                                                                                                                                                                                                                                                                         | Unadjusted estimates reported                                                                                                                                                                             |
|                             | 771                           | IBD            | Infancy                   |                                                      |                          |                          |                                                       | crude OR                                                         | 0.9 <sup>†</sup>      | 0.5-1.4                                                    | Not reported                                                                                                                                                                                                                                                                                                                                         | Unadjusted estimates reported                                                                                                                                                                             |
|                             | 444                           | CD             | Infancy                   |                                                      |                          |                          |                                                       | aOR                                                              | 2.1 <sup>†</sup>      | 1.3-3.4                                                    | 0.003                                                                                                                                                                                                                                                                                                                                                | Adjusted for mother's educational level                                                                                                                                                                   |
|                             | 388                           | CD             | Infancy                   |                                                      |                          |                          |                                                       | aOR                                                              | 1.1 <sup>†</sup>      | 0.7-1.9                                                    | Not reported                                                                                                                                                                                                                                                                                                                                         | Adjusted for age, gender, family history of IBD, maternal smoking and social class                                                                                                                        |
|                             | 388                           | CD             | Infancy                   |                                                      |                          |                          |                                                       | aOR                                                              | 1.3 <sup>†</sup>      | 0.7-2.6                                                    | Not reported                                                                                                                                                                                                                                                                                                                                         | Adjusted for age, gender, family history of IBD, maternal smoking and social class                                                                                                                        |
|                             | 388                           | CD             | Infancy                   |                                                      |                          |                          |                                                       | aOR                                                              | 1.2 <sup>†</sup>      | 0.5-5.1                                                    | Not reported                                                                                                                                                                                                                                                                                                                                         | Adjusted for age, gender, family history of IBD, maternal smoking and social class                                                                                                                        |
|                             | 407                           | CD             | Infancy                   |                                                      |                          |                          |                                                       | aOR                                                              | 0.36 <sup>†</sup>     | 0.35-1.43                                                  | <0.05                                                                                                                                                                                                                                                                                                                                                | Adjusted for age at study enrollment, gender and ethnicity                                                                                                                                                |
|                             | 1931                          | CD             | Infancy                   |                                                      |                          |                          |                                                       | aOR                                                              | 0.9 <sup>†</sup>      | 0.2-1.1                                                    | Not reported                                                                                                                                                                                                                                                                                                                                         | Adjusted for age, gender, region, and parental education and mutually adjusted for IBD parental history, birth weight, maternal smoking during pregnancy, siblings, ethnicity and residence in urban area |
|                             | 1761                          | UC             | Infancy                   |                                                      |                          |                          |                                                       | aOR                                                              | 0.9 <sup>†</sup>      | 0.5-0.9                                                    | Not reported                                                                                                                                                                                                                                                                                                                                         | Adjusted for age, gender, region, and parental education and mutually adjusted for IBD parental history, birth weight, maternal smoking during pregnancy, siblings, ethnicity and residence in urban area |
| Sajjadi, V.C. et al. 2007   | Brazil                        | Not Reported   | Breastfeeding             | 308                                                  | CD                       | Infancy                  | aHR                                                   | 0.77 <sup>†</sup>                                                | 0.28-2.09             | 0.616                                                      | Adjusted for sex, age, race, educational level, family income, residence, housing conditions, family size in adulthood and childhood, pets, exposure to untreated water, vaccination (childhood), viral diseases (childhood), antibiotic infections, exposure to antacid, antibiotics, protonic acid inhibitors, tobacco exposure and family history |                                                                                                                                                                                                           |
|                             |                               |                |                           | 308                                                  | UC                       | Infancy                  | aHR                                                   | 0.77 <sup>†</sup>                                                | 0.28-2.09             | 0.616                                                      | The authors only report that breastfeeding was not associated with the development of IBD, except in patients with pancolitis (see below)                                                                                                                                                                                                            |                                                                                                                                                                                                           |
|                             |                               |                |                           | 308                                                  | IBD                      | Infancy                  | OR                                                    | 2 <sup>†</sup>                                                   | 1.0-3.9               | NS                                                         | Only OR reported in 11 patients with ulcerative pancolitis                                                                                                                                                                                                                                                                                           |                                                                                                                                                                                                           |
|                             |                               |                |                           | 457                                                  | CD                       | Infancy                  | RR                                                    | Not reported                                                     | Not reported          | Not reported                                               | RR of CD associated with breastfeeding was close to unity (data not shown)                                                                                                                                                                                                                                                                           |                                                                                                                                                                                                           |
|                             |                               |                |                           | 250                                                  | UC                       | Infancy                  | RR                                                    | Not reported                                                     | Not reported          | Not reported                                               | RR of UC associated with breastfeeding was close to unity (data not shown)                                                                                                                                                                                                                                                                           |                                                                                                                                                                                                           |
|                             |                               |                |                           | 450                                                  | CD                       | Infancy                  | OR                                                    | <0.05                                                            | <0.05                 | <0.05                                                      | Same for UC (close to unity, data not shown)                                                                                                                                                                                                                                                                                                         |                                                                                                                                                                                                           |
|                             |                               |                |                           | 1188                                                 | UC                       | Infancy                  | OR                                                    | 1.5 <sup>†</sup>                                                 | 1.1-2.1               | <0.05                                                      | Unadjusted estimates reported; 81.3% UC vs 86.7% in controls                                                                                                                                                                                                                                                                                         |                                                                                                                                                                                                           |
|                             |                               |                |                           | 354                                                  | UC                       | Infancy                  | OR                                                    | 0.8 <sup>†</sup>                                                 | 0.47-1.37             | 0.42                                                       | Unadjusted estimates reported.                                                                                                                                                                                                                                                                                                                       |                                                                                                                                                                                                           |
|                             |                               |                |                           | 592                                                  | IBD                      | Infancy                  | aOR                                                   | 0.5 <sup>†</sup>                                                 | 0.3-1.0               | 0.058                                                      | Adjusted for age, gender, ethnicity, area of residence and socioeconomic status                                                                                                                                                                                                                                                                      |                                                                                                                                                                                                           |
|                             |                               |                |                           | 533                                                  | UC                       | Infancy                  | aOR                                                   | 0.5 <sup>†</sup>                                                 | 0.2-1.0               | 0.06                                                       | Adjusted for age, gender, ethnicity, area of residence and socioeconomic status                                                                                                                                                                                                                                                                      |                                                                                                                                                                                                           |
|                             |                               |                |                           | 545                                                  | CD                       | Infancy                  | aOR                                                   | 2.716 <sup>†</sup>                                               | 1.674-4.409           | <0.001                                                     | Adjusted for smoking at diagnosis, contact with cats in childhood, and sports activity in childhood                                                                                                                                                                                                                                                  |                                                                                                                                                                                                           |
|                             |                               |                |                           | 503                                                  | UC                       | Infancy                  | aOR                                                   | 1.692 <sup>†</sup>                                               | 1.022-2.811           | 0.041                                                      | Adjusted for sports activity and family size in childhood                                                                                                                                                                                                                                                                                            |                                                                                                                                                                                                           |
| Havassy, T. et al. 2013     | Slovakia                      | 2008-2009      | Breastfeeding 6-12 months | 545                                                  | CD                       | Infancy                  | Not reported                                          | Not reported                                                     | Not reported          | 84% CD vs 94% controls                                     |                                                                                                                                                                                                                                                                                                                                                      |                                                                                                                                                                                                           |
|                             |                               |                |                           | 503                                                  | UC                       | Infancy                  | Not reported                                          | Not reported                                                     | Not reported          | 43% vs 54% controls                                        |                                                                                                                                                                                                                                                                                                                                                      |                                                                                                                                                                                                           |
|                             |                               |                |                           | 851                                                  | CD                       | Infancy                  | OR                                                    | 0.97 <sup>†</sup>                                                | 0.58-1.61             | 0.9                                                        | Unadjusted estimates reported.                                                                                                                                                                                                                                                                                                                       |                                                                                                                                                                                                           |
|                             |                               |                |                           | 534                                                  | IBD                      | Infancy                  | OR                                                    | 1.07 <sup>†</sup>                                                | 0.52-2.16             | NS                                                         | Unadjusted estimates reported.                                                                                                                                                                                                                                                                                                                       |                                                                                                                                                                                                           |
|                             |                               |                |                           | 534                                                  | CD                       | Infancy                  | OR                                                    | 1.8 <sup>†</sup>                                                 | 0.4-5.38              | NS                                                         | Unadjusted estimates reported.                                                                                                                                                                                                                                                                                                                       |                                                                                                                                                                                                           |
|                             |                               |                |                           | 534                                                  | UC                       | Infancy                  | OR                                                    | 0.7 <sup>†</sup>                                                 | 0.2-1.84              | NS                                                         | Unadjusted estimates reported.                                                                                                                                                                                                                                                                                                                       |                                                                                                                                                                                                           |
|                             |                               |                |                           | 534                                                  | IBD                      | Infancy                  | OR                                                    | 0.5 <sup>†</sup>                                                 | 0.23-1.11             | NS                                                         | Unadjusted estimates reported.                                                                                                                                                                                                                                                                                                                       |                                                                                                                                                                                                           |
|                             |                               |                |                           | 534                                                  | CD                       | Infancy                  | OR                                                    | 0.63 <sup>†</sup>                                                | 0.2-1.91              | NS                                                         | Unadjusted estimates reported.                                                                                                                                                                                                                                                                                                                       |                                                                                                                                                                                                           |
|                             |                               |                |                           | 534                                                  | UC                       | Infancy                  | OR                                                    | 0.4 <sup>†</sup>                                                 | 0.13-1.28             | NS                                                         | Unadjusted estimates reported.                                                                                                                                                                                                                                                                                                                       |                                                                                                                                                                                                           |
|                             |                               |                |                           | 7702                                                 | CD                       | Infancy                  | OR                                                    | 1.04 <sup>†</sup>                                                | 0.88-1.25             | Not reported                                               | Unadjusted estimates reported.                                                                                                                                                                                                                                                                                                                       |                                                                                                                                                                                                           |
|                             |                               |                |                           | 1426                                                 | UC                       | Infancy                  | OR                                                    | 1.16 <sup>†</sup>                                                | 0.90-1.50             | Not reported                                               | Unadjusted estimates reported.                                                                                                                                                                                                                                                                                                                       |                                                                                                                                                                                                           |
|                             |                               |                |                           | Thompson, N.P. et al. 2000                           | UK                       | 1946-1958                | Breastfed                                             | 287                                                              | UC                    | Infancy                                                    | OR                                                                                                                                                                                                                                                                                                                                                   | 0.47 <sup>†</sup>                                                                                                                                                                                         |
| 287                         | UC                            | Infancy        | OR                        |                                                      |                          |                          |                                                       | 3.32 <sup>†</sup>                                                | 0.86-9.93             | 0.1                                                        | Unadjusted estimates reported.                                                                                                                                                                                                                                                                                                                       |                                                                                                                                                                                                           |
| 1136                        | CD                            | Infancy        | aOR                       |                                                      |                          |                          |                                                       | 0.088 <sup>†</sup>                                               | 0.018-0.243           | significant at p<0.0006 level after Bonferroni adjustment. | Adjusted for sex, age and country income based on GNI. 15                                                                                                                                                                                                                                                                                            |                                                                                                                                                                                                           |
| 1136                        | UC                            | Infancy        | aOR                       |                                                      |                          |                          |                                                       | 0.142 <sup>†</sup>                                               | 0.074-0.277           | significant at p<0.0006 level after Bonferroni adjustment. | Adjusted for sex, age and country income based on GNI. 15                                                                                                                                                                                                                                                                                            |                                                                                                                                                                                                           |
| 1136                        | CD                            | Infancy        | aOR                       |                                                      |                          |                          |                                                       | 0.542 <sup>†</sup>                                               | 0.310-0.949           | 0.032                                                      | Adjusted for sex, age and country income based on GNI. 15                                                                                                                                                                                                                                                                                            |                                                                                                                                                                                                           |
| 1136                        | UC                            | Infancy        | aOR                       |                                                      |                          |                          |                                                       | 1.05 <sup>†</sup>                                                | 0.708-1.557           | 0.809                                                      | Adjusted for sex, age and country income based on GNI. 15                                                                                                                                                                                                                                                                                            |                                                                                                                                                                                                           |
| 334                         | UC                            | Infancy        | OR                        |                                                      |                          |                          |                                                       | 1.2 <sup>†</sup>                                                 | 0.31-2.78             | NS                                                         | Unadjusted estimates reported.                                                                                                                                                                                                                                                                                                                       |                                                                                                                                                                                                           |
| 334                         | IBD                           | Infancy        | OR                        |                                                      |                          |                          |                                                       | 1 <sup>†</sup>                                                   | 0.35-2.84             | NS                                                         | Unadjusted estimates reported.                                                                                                                                                                                                                                                                                                                       |                                                                                                                                                                                                           |
| 334                         | UC                            | Infancy        | OR                        |                                                      |                          |                          |                                                       | 1.67 <sup>†</sup>                                                | 0.40-6.98             | NS                                                         | Unadjusted estimates reported.                                                                                                                                                                                                                                                                                                                       |                                                                                                                                                                                                           |
| 1487                        | IBD                           | Infancy        | OR                        |                                                      |                          |                          |                                                       | Not reported                                                     | Not reported          | Not reported                                               | N/A                                                                                                                                                                                                                                                                                                                                                  |                                                                                                                                                                                                           |
| 1487                        | IBD                           | Infancy        | OR                        |                                                      |                          |                          |                                                       | Not reported                                                     | Not reported          | Not reported                                               | N/A                                                                                                                                                                                                                                                                                                                                                  |                                                                                                                                                                                                           |
| Sliat, T. et al. 2007       | International IBD Study group | Not Reported   | Breastfeeding frequency   |                                                      |                          |                          |                                                       | 1487                                                             | IBD                   | Infancy                                                    | OR                                                                                                                                                                                                                                                                                                                                                   | Not reported                                                                                                                                                                                              |
|                             |                               |                |                           | 1487                                                 | IBD                      | Infancy                  | OR                                                    | Not reported                                                     | Not reported          | Not reported                                               | N/A                                                                                                                                                                                                                                                                                                                                                  |                                                                                                                                                                                                           |
|                             |                               |                |                           | 1487                                                 | IBD                      | Infancy                  | OR                                                    | Not reported                                                     | Not reported          | Not reported                                               | N/A                                                                                                                                                                                                                                                                                                                                                  |                                                                                                                                                                                                           |
|                             |                               |                |                           | 1487                                                 | IBD                      | Infancy                  | OR                                                    | Not reported                                                     | Not reported          | Not reported                                               | N/A                                                                                                                                                                                                                                                                                                                                                  |                                                                                                                                                                                                           |
|                             |                               |                |                           | 1487                                                 | IBD                      | Infancy                  | OR                                                    | Not reported                                                     | Not reported          | Not reported                                               | N/A                                                                                                                                                                                                                                                                                                                                                  |                                                                                                                                                                                                           |
|                             |                               |                |                           | 1487                                                 | IBD                      | Infancy                  | OR                                                    | Not reported                                                     | Not reported          | Not reported                                               | N/A                                                                                                                                                                                                                                                                                                                                                  |                                                                                                                                                                                                           |
|                             |                               |                |                           | 1487                                                 | IBD                      | Infancy                  | OR                                                    | Not reported                                                     | Not reported          | Not reported                                               | N/A                                                                                                                                                                                                                                                                                                                                                  |                                                                                                                                                                                                           |
|                             |                               |                |                           | 1487                                                 | IBD                      | Infancy                  | OR                                                    | Not reported                                                     | Not reported          | Not reported                                               | N/A                                                                                                                                                                                                                                                                                                                                                  |                                                                                                                                                                                                           |
|                             |                               |                |                           | 204                                                  | UC                       | Infancy                  | OR                                                    | lower odds                                                       | Not reported          | Not reported                                               | 0.005                                                                                                                                                                                                                                                                                                                                                | N/A                                                                                                                                                                                                       |
|                             |                               |                |                           | 228                                                  | CD                       | Infancy                  | OR                                                    | Not reported                                                     | Not reported          | Not reported                                               | NS                                                                                                                                                                                                                                                                                                                                                   | N/A                                                                                                                                                                                                       |
|                             |                               |                |                           | 204                                                  | UC                       | Infancy                  | OR                                                    | higher odds                                                      | Not reported          | Not reported                                               | 0.005                                                                                                                                                                                                                                                                                                                                                | N/A                                                                                                                                                                                                       |
|                             |                               |                |                           | Wang, Y.-F. et al. 2013                              | China                    | April 2007 to April 2010 | Breastfeeding                                         | 228                                                              | CD                    | Infancy                                                    | OR                                                                                                                                                                                                                                                                                                                                                   | Not reported                                                                                                                                                                                              |
| 2616                        | UC                            | Infancy        | OR                        |                                                      |                          |                          |                                                       | 1.08 <sup>†</sup>                                                | 0.79-1.47             | 0.628                                                      | Unadjusted estimates reported.                                                                                                                                                                                                                                                                                                                       |                                                                                                                                                                                                           |
| 252                         | IBD                           | Infancy        | aOR                       |                                                      |                          |                          |                                                       | Not reported                                                     | Not reported          | Not reported                                               | 0.71                                                                                                                                                                                                                                                                                                                                                 | 52% cases vs 55% controls.                                                                                                                                                                                |
| 832                         | CD                            | Infancy        | aOR                       |                                                      |                          |                          |                                                       | 0.272 <sup>†</sup>                                               | 0.087-0.835           | Not reported                                               | Adjusting variables not reported                                                                                                                                                                                                                                                                                                                     |                                                                                                                                                                                                           |
| 626                         | UC                            | Infancy        | aOR                       |                                                      |                          |                          |                                                       | Not reported                                                     | Not reported          | Not reported                                               | NS                                                                                                                                                                                                                                                                                                                                                   | N/A                                                                                                                                                                                                       |
| 184                         | CD                            | Infancy        | OR                        |                                                      |                          |                          |                                                       | Not reported                                                     | Not reported          | Not reported                                               | 0.548                                                                                                                                                                                                                                                                                                                                                | Unadjusted estimates reported.                                                                                                                                                                            |
| 154                         | UC                            | Infancy        | OR                        |                                                      |                          |                          |                                                       | Not reported                                                     | Not reported          | Not reported                                               | 0.18                                                                                                                                                                                                                                                                                                                                                 | Unadjusted estimates reported.                                                                                                                                                                            |
| 6773                        | IBD                           | Infancy        | crude OR                  |                                                      |                          |                          |                                                       | 1.05 <sup>†</sup>                                                | 0.75-1.47             | 0.79                                                       | Unadjusted estimates reported.                                                                                                                                                                                                                                                                                                                       |                                                                                                                                                                                                           |
| 3137                        | UC                            | Infancy        | aOR                       |                                                      |                          |                          |                                                       | 0.99 <sup>†</sup>                                                | 0.90-1.01             | 0.335                                                      | Adjusted for potential confounders such as mode of delivery or obstetric complications, shorter duration of breastfeeding (3.33 vs 5.25 mos, p<0.004)                                                                                                                                                                                                |                                                                                                                                                                                                           |
| 913                         | UC                            | Infancy        | aOR                       |                                                      |                          |                          |                                                       | 0.97 <sup>†</sup>                                                | 0.89-0.98             | 0.008                                                      | Adjusted for potential confounders such as mode of delivery or obstetric complications, shorter duration of breastfeeding (4.24 vs 5.25 mos, p<0.004)                                                                                                                                                                                                |                                                                                                                                                                                                           |
| 757                         | CD                            | Infancy        | OR                        |                                                      |                          |                          |                                                       | Not reported                                                     | Not reported          | Not reported                                               | <0.26                                                                                                                                                                                                                                                                                                                                                | 43.8% CD vs 45% controls.                                                                                                                                                                                 |
| 650                         | UC                            | Infancy        | OR                        |                                                      |                          |                          |                                                       | Not reported                                                     | Not reported          | Not reported                                               | <0.26                                                                                                                                                                                                                                                                                                                                                | 50% UC vs 45% controls.                                                                                                                                                                                   |
| Bernstein, C.N. et al. 2006 | Maritoba, Canada              | Not Reported   | Breastfeeding             | 616                                                  | CD                       | Infancy                  | Mean difference in breastfeeding duration             | 1.17 mo <sup>†</sup>                                             | Not reported          | <0.01                                                      | CD associated with no or very short duration of breastfeeding                                                                                                                                                                                                                                                                                        |                                                                                                                                                                                                           |
|                             |                               |                |                           | 885                                                  | IBD                      | Infancy                  | aOR                                                   | 0.23 <sup>†</sup>                                                | 0.14-0.36             | Not reported                                               | Demonstrated differences in the distribution of risk alleles suggest potential interactions between immunologic pathways contributing to IBD pathogenesis and early exposures influencing the host microbiome                                                                                                                                        |                                                                                                                                                                                                           |
|                             |                               |                |                           | 380                                                  | CD                       | Infancy                  | OR                                                    | Not reported                                                     | Not reported          | Not reported                                               | 0.47                                                                                                                                                                                                                                                                                                                                                 | Adjusting variables not reported                                                                                                                                                                          |
|                             |                               |                |                           | 652                                                  | UC                       | Infancy                  | OR                                                    | Not reported                                                     | Not reported          | Not reported                                               | 0.33                                                                                                                                                                                                                                                                                                                                                 | N/A                                                                                                                                                                                                       |
|                             |                               |                |                           | 380                                                  | CD                       | Infancy                  | OR                                                    | Not reported                                                     | Not reported          | Not reported                                               | 0.19                                                                                                                                                                                                                                                                                                                                                 | N/A                                                                                                                                                                                                       |
|                             |                               |                |                           | 652                                                  | UC                       | Infancy                  | OR                                                    | Not reported                                                     | Not reported          | Not reported                                               | 0.52                                                                                                                                                                                                                                                                                                                                                 | N/A                                                                                                                                                                                                       |
|                             |                               |                |                           | 380                                                  | CD                       | Infancy                  | OR                                                    | Not reported                                                     | Not reported          | Not reported                                               | 0.13                                                                                                                                                                                                                                                                                                                                                 | N/A                                                                                                                                                                                                       |
|                             |                               |                |                           | 652                                                  | UC                       | Infancy                  | OR                                                    | Not reported                                                     | Not reported          | Not reported                                               | 0.58                                                                                                                                                                                                                                                                                                                                                 | N/A                                                                                                                                                                                                       |
|                             |                               |                |                           | 3289                                                 | IBD                      | Infancy                  | aOR                                                   | 1.1**                                                            | 0.2-6.1               | Not reported                                               | Adjusted for at least sex and race                                                                                                                                                                                                                                                                                                                   |                                                                                                                                                                                                           |
|                             |                               |                |                           | 109                                                  | CD                       | Infancy                  | OR                                                    | Not reported                                                     | Not reported          | Not reported                                               | 74% vs 82%, only unselected population controls                                                                                                                                                                                                                                                                                                      |                                                                                                                                                                                                           |
|                             |                               |                |                           | 131                                                  | UC                       | Infancy                  | OR                                                    | Not reported                                                     | Not reported          | Not reported                                               | 76% vs 82%                                                                                                                                                                                                                                                                                                                                           |                                                                                                                                                                                                           |
|                             |                               |                |                           | Urahama, H. et al. 1999                              | Japan                    | 1979-1993                | Breastfeeding                                         | 168                                                              | CD                    | Infancy                                                    | OR                                                                                                                                                                                                                                                                                                                                                   | 0.1 <sup>†</sup>                                                                                                                                                                                          |
| 399                         | UC                            | Infancy        | OR                        |                                                      |                          |                          |                                                       | 0.51 <sup>†</sup>                                                | 0.11-0.89             | Not reported                                               | Unadjusted estimates reported.                                                                                                                                                                                                                                                                                                                       |                                                                                                                                                                                                           |
| 305                         | CD                            | Infancy        | aOR                       |                                                      |                          |                          |                                                       | 4.3 <sup>†</sup>                                                 | 1.6-10.5              | 0.002                                                      | Adjusted for mother's educational level, father's employment, gluten introduction, number of siblings, autoimmune diseases, pets and bed sharing                                                                                                                                                                                                     |                                                                                                                                                                                                           |
| 305                         | UC                            | Infancy        | aOR                       |                                                      |                          |                          |                                                       | 2.8 <sup>†</sup>                                                 | 1-5                   | 0.021                                                      | Adjusted for mother's educational level, father's employment, breast feeding, number of siblings, autoimmune diseases, pets and bed sharing                                                                                                                                                                                                          |                                                                                                                                                                                                           |
| 365                         | CD                            | Infancy        | aOR                       |                                                      |                          |                          |                                                       | 2.8 <sup>†</sup>                                                 | 1.6-4.9               | <0.001                                                     | Adjusted for mother's educational level, father's employment, breast feeding, number of siblings, autoimmune diseases, pets and bed sharing                                                                                                                                                                                                          |                                                                                                                                                                                                           |
| 1924                        | CD                            | Infancy        | OR                        |                                                      |                          |                          |                                                       | 0.881 <sup>†</sup>                                               | 0.68-1.05             | Not reported                                               | Unadjusted estimates reported. 67.4% CD vs 71.5% controls.                                                                                                                                                                                                                                                                                           |                                                                                                                                                                                                           |
| 1581                        | UC                            | Infancy        | OR                        |                                                      |                          |                          |                                                       | 1.015 <sup>†</sup>                                               | 0.813-1.267           | Not reported                                               | Unadjusted estimates reported. 71.8% UC vs 71.5% controls.                                                                                                                                                                                                                                                                                           |                                                                                                                                                                                                           |
| 181                         | IBD                           | Infancy        | OR                        |                                                      |                          |                          |                                                       | 0.869 <sup>†</sup>                                               | 0.31-0.71             | 0.002                                                      | Unadjusted estimates reported.                                                                                                                                                                                                                                                                                                                       |                                                                                                                                                                                                           |
| 144                         | IBD                           | Infancy        | OR                        |                                                      |                          |                          |                                                       | 0.604 <sup>†</sup>                                               | 0.29-1.1              | 0.183                                                      | Unadjusted estimates reported.                                                                                                                                                                                                                                                                                                                       |                                                                                                                                                                                                           |
| 359                         | CD                            | Infancy        | OR                        |                                                      |                          |                          |                                                       | 0.3 <sup>†</sup>                                                 | 0.05-0.1              | 0.001                                                      | Unadjusted estimates reported.                                                                                                                                                                                                                                                                                                                       |                                                                                                                                                                                                           |
| 385                         | UC                            | Infancy        | OR                        |                                                      |                          |                          |                                                       | 1.4 <sup>†</sup>                                                 | 0.6-3                 | 0.385                                                      | Unadjusted estimates reported.                                                                                                                                                                                                                                                                                                                       |                                                                                                                                                                                                           |
| 1671                        | CD                            | Infancy        | MV aOR                    |                                                      |                          |                          |                                                       | 0.56 <sup>†</sup>                                                | 0.37-0.87             | 0.01                                                       | Adjusted for gender, age, smoking status at diagnosis                                                                                                                                                                                                                                                                                                |                                                                                                                                                                                                           |
| 1669                        | UC                            | Infancy        | MV aOR                    | 0.84 <sup>†</sup>                                    | 0.54-1.31                | 0.45                     | Adjusted for gender, age, smoking status at diagnosis |                                                                  |                       |                                                            |                                                                                                                                                                                                                                                                                                                                                      |                                                                                                                                                                                                           |
| 1671                        | CD                            | Infancy        | MV aOR                    | 0.84 <sup>†</sup>                                    | 0.57-1.23                | 0.36                     | Adjusted for gender, age, smoking status at diagnosis |                                                                  |                       |                                                            |                                                                                                                                                                                                                                                                                                                                                      |                                                                                                                                                                                                           |
| 1669                        | UC                            | Infancy        | MV aOR                    | 0.98 <sup>†</sup>                                    | 0.65-1.48                | 0.93                     | Adjusted for gender, age, smoking status at diagnosis |                                                                  |                       |                                                            |                                                                                                                                                                                                                                                                                                                                                      |                                                                                                                                                                                                           |

| Author and Year               | Study Location              | Study Time Period             | Exposure Description                                                         | Total sample size (n)                               | COX/CBD   | Period of exposure | Effect estimate value | Confidence interval (specify if different from 95% CI)                                                                                                                                                               | Comments                                                                                                                                                                                                              |                                                                                                          |
|-------------------------------|-----------------------------|-------------------------------|------------------------------------------------------------------------------|-----------------------------------------------------|-----------|--------------------|-----------------------|----------------------------------------------------------------------------------------------------------------------------------------------------------------------------------------------------------------------|-----------------------------------------------------------------------------------------------------------------------------------------------------------------------------------------------------------------------|----------------------------------------------------------------------------------------------------------|
| Cohort Studies                | Asperg, S. et al. 2006      | Sweden                        | parity 1 compared with ≥2                                                    | 1479315                                             | CD        | 0-5 yrs            | 1.57                  | 0.95-1.40                                                                                                                                                                                                            | Unadjusted estimates reported                                                                                                                                                                                         |                                                                                                          |
|                               |                             |                               |                                                                              | 1479315                                             | CD        | 0-5 yrs            | 1.17                  | 0.96-1.39                                                                                                                                                                                                            | Unadjusted estimates reported                                                                                                                                                                                         |                                                                                                          |
|                               | Bager, P. et al. 2012       | Denmark                       | Helminthic Infection (Fibed prescription for Mebendazole)                    | 924740                                              | BD        | 0-5 yrs old        | 0.9                   | 0.42-1.93                                                                                                                                                                                                            | Adjusted for age, sex, calendar period, birth order, average gross annual income based on total household income, degree of urbanization, birth place of parents, and any parental diagnosis of the specific outcome. |                                                                                                          |
|                               |                             |                               |                                                                              | 924740                                              | BD        | 1-5 years old      | 1.17                  | 0.7-1.62                                                                                                                                                                                                             | Adjusted for age, sex, calendar period, birth order, average gross annual income based on total household income, degree of urbanization, birth place of parents, and any parental diagnosis of the specific outcome. |                                                                                                          |
|                               | Benchimol, E.I. et al. 2017 | Canada                        | Alberta 1999-2008, Manitoba and Ontario 1999-2010, and Nova Scotia 2000-2008 | 2633                                                | BD        | 0-5 years old      | 0.75-0.78†            | 11 years (0-18-CBD), 12 years (0-24-CBD), 13 years (0-4-18), 14 years (0-10-15), and 15 years (0-11-20)                                                                                                              | Adjusted for age, sex and neighborhood income                                                                                                                                                                         |                                                                                                          |
|                               |                             |                               |                                                                              | 4295                                                | BD        | 0-5 yrs            | Not significant       | N/A                                                                                                                                                                                                                  |                                                                                                                                                                                                                       |                                                                                                          |
|                               | Burnett, D. et al. 2020     | Canada                        | 1988-2014                                                                    | Living area (Urban vs. Rural) Administrative cohort | 292765    | BD                 | 0-5 yrs               | Not significant                                                                                                                                                                                                      | N/A                                                                                                                                                                                                                   |                                                                                                          |
|                               | Ekan, M. et al. 2020        | Canada                        | April 24, 1991 and March 31st, 2014                                          | Living area (Urban vs. Rural) Clinical cohort       | 2218799   | BD                 | 0-5 yrs               | Not significant                                                                                                                                                                                                      | N/A                                                                                                                                                                                                                   |                                                                                                          |
|                               |                             |                               |                                                                              |                                                     | 1281515   | BD                 | Birth                 | 1.1*                                                                                                                                                                                                                 | 0.91-1.32                                                                                                                                                                                                             | Adjusted for gender, place of origin, number of siblings and place of living                             |
|                               | Klement, E. et al. 2008     | Israel                        | 1998-2004                                                                    | Birth order (3 vs 1)                                | 93564     | BD                 | Birth                 | 1.26*                                                                                                                                                                                                                | 1.02-1.55                                                                                                                                                                                                             | Adjusted for gender, place of origin, number of siblings and place of living                             |
|                               |                             |                               |                                                                              |                                                     | 35593     | BD                 | Birth                 | 1.51*                                                                                                                                                                                                                | 1.09-2.09                                                                                                                                                                                                             | Adjusted for gender, place of origin, number of siblings and place of living                             |
|                               | Lange, A. et al. 2014       | Denmark                       | 1995-2009                                                                    | Urban life                                          | 30023     | BD                 | Birth                 | 1.35*                                                                                                                                                                                                                | 1.47-1.77                                                                                                                                                                                                             | Adjusted for gender, place of origin, number of siblings and place of living                             |
|                               |                             |                               |                                                                              |                                                     | 979039    | CD                 | 0-5 yrs               | 1.4*                                                                                                                                                                                                                 | 1.0-1.8                                                                                                                                                                                                               | Unadjusted estimates reported                                                                            |
|                               | Poisouby, A.L. et al. 2009  | Victoria, Australia           | 1983-1998                                                                    | Living in urban area compared with not urban        | 976020    | CD                 | Perinatal             | 1.46*                                                                                                                                                                                                                | 1.07-1.99                                                                                                                                                                                                             | Adjusted for sex, abnormality, interventional birth, urban, married, SES, maternal age and year of birth |
|                               |                             |                               |                                                                              |                                                     | 998822    | CD                 | Perinatal             | 1.52*                                                                                                                                                                                                                | 0.74-2.25                                                                                                                                                                                                             | Adjusted for sex, abnormality, interventional birth, urban, married, SES, maternal age and year of birth |
| Timin, S. 2014                | Northern Europe             | 1945-1973                     | Village compared with city                                                   | 10863                                               | BD        | 0-5 yrs            | 0.55*                 | 0.33-0.88                                                                                                                                                                                                            | Adjusted for age, sex, smoking and BMI                                                                                                                                                                                |                                                                                                          |
|                               |                             |                               |                                                                              | 10863                                               | BD        | 0-5 yrs            | 0.75                  | 0.52-1.10                                                                                                                                                                                                            | Adjusted for age, sex, smoking and BMI                                                                                                                                                                                |                                                                                                          |
| Case-Control Studies          | Amra, D.K. et al. 2006      | Montreal, Canada              | 1995-2004                                                                    | 388                                                 | CD        | Pregnancy          | 0.9*                  | 0.5-1.6                                                                                                                                                                                                              | Adjusted for age, gender, family history of BD, maternal smoking and maternal education                                                                                                                               |                                                                                                          |
|                               |                             |                               |                                                                              | 388                                                 | CD        | 0-5 yrs            | 1.2*                  | 0.7-2.2                                                                                                                                                                                                              | Adjusted for age, gender, family history of BD, maternal smoking and maternal education                                                                                                                               |                                                                                                          |
|                               |                             |                               |                                                                              | 388                                                 | CD        | 0-5 yrs            | Not Reported          | Not Reported                                                                                                                                                                                                         |                                                                                                                                                                                                                       |                                                                                                          |
|                               |                             |                               |                                                                              | 407                                                 | CD        | 0-5 yrs            | 2.1*                  | 1.2-4.0                                                                                                                                                                                                              | Adjusted for age at study enrollment, ethnicity and gender                                                                                                                                                            |                                                                                                          |
|                               |                             |                               |                                                                              | 407                                                 | CD        | 0-5 yrs            | 1.18*                 | 0.71-2.0                                                                                                                                                                                                             | Adjusted for age at study enrollment, ethnicity and gender                                                                                                                                                            |                                                                                                          |
|                               |                             |                               |                                                                              | 407                                                 | CD        | 0-5 yrs            | 1.21*                 | 0.71-2.1                                                                                                                                                                                                             | Adjusted for age at study enrollment, ethnicity and gender                                                                                                                                                            |                                                                                                          |
|                               |                             |                               |                                                                              | 407                                                 | CD        | 0-5 yrs            | 0.68*                 | 0.43-1.09                                                                                                                                                                                                            | Adjusted for age at study enrollment, ethnicity and gender                                                                                                                                                            |                                                                                                          |
|                               |                             |                               |                                                                              | 407                                                 | CD        | 0-5 yrs            | 0.55*                 | 0.31-0.97                                                                                                                                                                                                            | Adjusted for age at study enrollment, ethnicity and gender                                                                                                                                                            |                                                                                                          |
|                               |                             |                               |                                                                              | 407                                                 | CD        | 0-5 yrs            | 0.87*                 | 0.68-1.11                                                                                                                                                                                                            | Adjusted for age at study enrollment, ethnicity and gender                                                                                                                                                            |                                                                                                          |
|                               |                             |                               |                                                                              | 407                                                 | CD        | 0-5 yrs            | 1.95*                 | 0.69-5.83                                                                                                                                                                                                            | Adjusted for age at study enrollment, ethnicity and gender                                                                                                                                                            |                                                                                                          |
|                               | Basson, A. et al. 2014      | Western Cape, South Africa    | September 2011 and January 2011                                              | 407                                                 | CD        | 0-5 yrs            | 1.47*                 | 0.92-2.34                                                                                                                                                                                                            | Adjusted for age at study enrollment, ethnicity and gender                                                                                                                                                            |                                                                                                          |
|                               |                             |                               |                                                                              | 407                                                 | CD        | 0-5 yrs            | 1.67*                 | 0.83-3.45                                                                                                                                                                                                            | Adjusted for age at study enrollment, ethnicity and gender                                                                                                                                                            |                                                                                                          |
|                               |                             |                               |                                                                              | 407                                                 | CD        | 0-5 yrs            | 0.87*                 | 0.59-1.42                                                                                                                                                                                                            | Adjusted for age at study enrollment, ethnicity and gender                                                                                                                                                            |                                                                                                          |
|                               |                             |                               |                                                                              | 407                                                 | CD        | 0-5 yrs            | 0.99*                 | 0.60-1.63                                                                                                                                                                                                            | Adjusted for age at study enrollment, ethnicity and gender                                                                                                                                                            |                                                                                                          |
|                               |                             |                               |                                                                              | 407                                                 | CD        | 0-5 yrs            | 0.86*                 | 0.46-1.66                                                                                                                                                                                                            | Adjusted for age and gender                                                                                                                                                                                           |                                                                                                          |
| Bernstein, C.N. et al. 2006   | Manitoba, Canada            | Not Reported                  | 402                                                                          | CD                                                  | 0-5 yrs   | 0.66*              | 0.48-0.97             | Adjusted for age and gender                                                                                                                                                                                          |                                                                                                                                                                                                                       |                                                                                                          |
|                               |                             |                               | 707                                                                          | CD                                                  | 0-5 yrs   | 0.97               | 0.63-1.57             | Adjusted for age and gender                                                                                                                                                                                          |                                                                                                                                                                                                                       |                                                                                                          |
| Bernstein, C.N. et al. 2019   | Manitoba, Canada            | 1970-2010                     | Rural vs urban                                                               | 12558                                               | BD        | Perinatal          | 0.91                  | 0.72-1.15                                                                                                                                                                                                            | Unadjusted estimates reported                                                                                                                                                                                         |                                                                                                          |
| Boraberg, A. et al. 2011      | Central South of Chile      | June 2009 and February 2011   | 236                                                                          | CD                                                  | 0-5 yrs   | Infancy            | Not reported          | Not reported                                                                                                                                                                                                         |                                                                                                                                                                                                                       |                                                                                                          |
|                               |                             |                               | 236                                                                          | CD                                                  | 0-5 yrs   | 2.2*               | 1-1.4                 | Adjusted for age (13B women/13B years), sex (male/female), and rural place of living in the first year of life and mutually adjusted for at least one parent with Maguache descent, high paternal education and pars |                                                                                                                                                                                                                       |                                                                                                          |
| Doyle, J.B. et al. 2017       | Northern Ireland            | 1971-1996                     | Household Size                                                               | 67173                                               | BD        | Neonatal           | Not Significant       | Not Significant                                                                                                                                                                                                      |                                                                                                                                                                                                                       |                                                                                                          |
|                               |                             |                               |                                                                              | 274                                                 | CD        | 0-5 yrs            | 1.38*                 | 0.93-2.00                                                                                                                                                                                                            | Unadjusted estimates reported                                                                                                                                                                                         |                                                                                                          |
|                               |                             |                               |                                                                              | 274                                                 | CD        | 0-5 yrs            | 0.94                  | 0.25-3.95                                                                                                                                                                                                            | Unadjusted estimates reported                                                                                                                                                                                         |                                                                                                          |
|                               |                             |                               |                                                                              | 274                                                 | CD        | 0-5 yrs            | 0.96                  | 0.25-3.95                                                                                                                                                                                                            | Unadjusted estimates reported                                                                                                                                                                                         |                                                                                                          |
|                               |                             |                               |                                                                              | 274                                                 | CD        | 0-5 yrs            | 1.25                  | 0.43-3.59                                                                                                                                                                                                            | Unadjusted estimates reported                                                                                                                                                                                         |                                                                                                          |
|                               |                             |                               |                                                                              | 274                                                 | CD        | 0-5 yrs            | 1.71                  | 0.48-6.16                                                                                                                                                                                                            | Unadjusted estimates reported                                                                                                                                                                                         |                                                                                                          |
|                               |                             |                               |                                                                              | 274                                                 | CD        | 0-5 yrs            | 0.77                  | 0.27-2.25                                                                                                                                                                                                            | Unadjusted estimates reported                                                                                                                                                                                         |                                                                                                          |
|                               |                             |                               |                                                                              | 274                                                 | CD        | 0-5 yrs            | 1.1*                  | 0.24-5.02                                                                                                                                                                                                            | Unadjusted estimates reported                                                                                                                                                                                         |                                                                                                          |
|                               |                             |                               |                                                                              | 274                                                 | CD        | 0-5 yrs            | 1.23                  | 0.46-3.27                                                                                                                                                                                                            | Unadjusted estimates reported                                                                                                                                                                                         |                                                                                                          |
|                               |                             |                               |                                                                              | 274                                                 | CD        | 0-5 yrs            | 0.99*                 | 0.39-2.44                                                                                                                                                                                                            | Unadjusted estimates reported                                                                                                                                                                                         |                                                                                                          |
| Feeney, M.A. et al. 2002      | UK                          | Not Reported                  | 274                                                                          | CD                                                  | 0-5 yrs   | 0.96*              | 0.41-2.18             | Unadjusted estimates reported                                                                                                                                                                                        |                                                                                                                                                                                                                       |                                                                                                          |
|                               |                             |                               | 274                                                                          | CD                                                  | 0-5 yrs   | 0.96*              | 0.41-2.18             | Unadjusted estimates reported                                                                                                                                                                                        |                                                                                                                                                                                                                       |                                                                                                          |
|                               |                             |                               | 274                                                                          | CD                                                  | 0-5 yrs   | 0.91               | 0.41-1.63             | Unadjusted estimates reported                                                                                                                                                                                        |                                                                                                                                                                                                                       |                                                                                                          |
|                               |                             |                               | 274                                                                          | CD                                                  | 0-5 yrs   | 1.27               | 0.72-2.26             | Unadjusted estimates reported                                                                                                                                                                                        |                                                                                                                                                                                                                       |                                                                                                          |
|                               |                             |                               | 274                                                                          | CD                                                  | 0-5 yrs   | 0.65*              | 0.34-1.24             | Unadjusted estimates reported                                                                                                                                                                                        |                                                                                                                                                                                                                       |                                                                                                          |
|                               |                             |                               | 274                                                                          | CD                                                  | 0-5 yrs   | 0.69*              | 0.35-1.34             | Unadjusted estimates reported                                                                                                                                                                                        |                                                                                                                                                                                                                       |                                                                                                          |
|                               |                             |                               | 274                                                                          | CD                                                  | 0-5 yrs   | 1.76*              | 0.78-4.14             | Unadjusted estimates reported                                                                                                                                                                                        |                                                                                                                                                                                                                       |                                                                                                          |
|                               |                             |                               | 274                                                                          | CD                                                  | 0-5 yrs   | 0.99*              | 0.46-2.09             | Unadjusted estimates reported                                                                                                                                                                                        |                                                                                                                                                                                                                       |                                                                                                          |
|                               |                             |                               | 274                                                                          | CD                                                  | 0-5 yrs   | 0.89*              | 0.41-1.91             | Unadjusted estimates reported                                                                                                                                                                                        |                                                                                                                                                                                                                       |                                                                                                          |
|                               |                             |                               | 274                                                                          | CD                                                  | 0-5 yrs   | 0.67               | 0.25-1.84             | Unadjusted estimates reported                                                                                                                                                                                        |                                                                                                                                                                                                                       |                                                                                                          |
| Geary, R.B. et al. 2010       | Canterbury, New Zealand     | June 1, 2003 and May 30, 2005 | 1233                                                                         | CD                                                  | Infancy   | 0.83*              | 0.6-1.13              | Adjusted for family history of BD, smoking status, age at recruitment, social class at birth, ethnic identity and sex                                                                                                |                                                                                                                                                                                                                       |                                                                                                          |
|                               |                             |                               | 1233                                                                         | CD                                                  | Infancy   | 1.11*              | 0.82-1.51             | Adjusted for family history of BD, smoking status, age at recruitment, social class at birth, ethnic identity and sex                                                                                                |                                                                                                                                                                                                                       |                                                                                                          |
|                               |                             |                               | 1233                                                                         | CD                                                  | Infancy   | 1.24*              | 0.92-1.69             | Adjusted for family history of BD, smoking status, age at recruitment, social class at birth, ethnic identity and sex                                                                                                |                                                                                                                                                                                                                       |                                                                                                          |
|                               |                             |                               | 1233                                                                         | CD                                                  | Infancy   | 0.49**             | 0.34-0.69             | Adjusted for family history of BD, smoking status, age at recruitment, social class at birth, ethnic identity and sex                                                                                                |                                                                                                                                                                                                                       |                                                                                                          |
|                               |                             |                               | 1233                                                                         | CD                                                  | Infancy   | 0.66*              | 0.46-0.93             | Adjusted for family history of BD, smoking status, age at recruitment, social class at birth, ethnic identity and sex                                                                                                |                                                                                                                                                                                                                       |                                                                                                          |
|                               |                             |                               | 728                                                                          | CD                                                  | 0-5 yrs   | 1.8*               | 0.6-5.4               | Unadjusted estimates reported                                                                                                                                                                                        |                                                                                                                                                                                                                       |                                                                                                          |
|                               |                             |                               | 728                                                                          | CD                                                  | 0-5 yrs   | 0.8                | 0.5-1.7               | Unadjusted estimates reported                                                                                                                                                                                        |                                                                                                                                                                                                                       |                                                                                                          |
|                               |                             |                               | 728                                                                          | CD                                                  | 0-5 yrs   | 1*                 | 1-1.23                | Unadjusted estimates reported                                                                                                                                                                                        |                                                                                                                                                                                                                       |                                                                                                          |
|                               |                             |                               | 728                                                                          | CD                                                  | 0-5 yrs   | 1.3*               | 0.7-2.2               | Unadjusted estimates reported                                                                                                                                                                                        |                                                                                                                                                                                                                       |                                                                                                          |
|                               |                             |                               | 728                                                                          | CD                                                  | 0-5 yrs   | 1.3*               | 1.3-8.3               | Unadjusted estimates reported                                                                                                                                                                                        |                                                                                                                                                                                                                       |                                                                                                          |
| Gent, A. E. et al. 1994       | UK                          | 1988                          | 728                                                                          | CD                                                  | 0-5 yrs   | 1.3*               | 0.7-2.2               | Unadjusted estimates reported                                                                                                                                                                                        |                                                                                                                                                                                                                       |                                                                                                          |
|                               |                             |                               | 728                                                                          | CD                                                  | 0-5 yrs   | 1.1*               | 0.5-2.6               | Unadjusted estimates reported                                                                                                                                                                                        |                                                                                                                                                                                                                       |                                                                                                          |
|                               |                             |                               | 728                                                                          | CD                                                  | 0-5 yrs   | 1.4*               | 0.7-2.5               | Unadjusted estimates reported                                                                                                                                                                                        |                                                                                                                                                                                                                       |                                                                                                          |
|                               |                             |                               | 728                                                                          | CD                                                  | 0-5 yrs   | 2.6*               | 0.9-7.3               | Unadjusted estimates reported                                                                                                                                                                                        |                                                                                                                                                                                                                       |                                                                                                          |
|                               |                             |                               | 728                                                                          | CD                                                  | 0-5 yrs   | 1.2*               | 0.7-2.1               | Unadjusted estimates reported                                                                                                                                                                                        |                                                                                                                                                                                                                       |                                                                                                          |
|                               |                             |                               | 4615                                                                         | BD                                                  | 0-5 yrs   | 0.94               | 0.53-1.66             | Unadjusted estimates reported                                                                                                                                                                                        |                                                                                                                                                                                                                       |                                                                                                          |
|                               |                             |                               | 4615                                                                         | BD                                                  | 0-5 yrs   | 1.25               | 0.78-2.00             | Unadjusted estimates reported                                                                                                                                                                                        |                                                                                                                                                                                                                       |                                                                                                          |
|                               |                             |                               | 4615                                                                         | BD                                                  | 0-5 yrs   | 1.4*               | 0.83-2.30             | Unadjusted estimates reported                                                                                                                                                                                        |                                                                                                                                                                                                                       |                                                                                                          |
|                               |                             |                               | 4615                                                                         | BD                                                  | Birth     | 0.68               | 0.51-0.91             | Unadjusted estimates reported                                                                                                                                                                                        |                                                                                                                                                                                                                       |                                                                                                          |
|                               |                             |                               | 853                                                                          | CD                                                  | 0-5 yrs   | 1.26*              | 0.92-1.73             | Unadjusted estimates reported                                                                                                                                                                                        |                                                                                                                                                                                                                       |                                                                                                          |
| Han, D.Y. et al. 2010         | New Zealand                 | Not Reported                  | 853                                                                          | CD                                                  | 0-5 yrs   | 0.82*              | 0.58-1.22             | Unadjusted estimates reported                                                                                                                                                                                        |                                                                                                                                                                                                                       |                                                                                                          |
|                               |                             |                               | 853                                                                          | CD                                                  | 0-5 yrs   | 1.08               | 0.8-1.45              | Unadjusted estimates reported                                                                                                                                                                                        |                                                                                                                                                                                                                       |                                                                                                          |
|                               |                             |                               | 534                                                                          | CD                                                  | Infancy   | 0.7*               | 0.51-1.06             | Adjusted for smoking status, appendicitis, tonsillitis, usage of oral contraceptives, and consumption of fibre, sugar, coffee, and eggs and mutually adjusted with variables in analysis                             |                                                                                                                                                                                                                       |                                                                                                          |
|                               |                             |                               | 534                                                                          | CD                                                  | Infancy   | 0.5*               | 0.33-0.77             | Adjusted for smoking status, appendicitis, tonsillitis, usage of oral contraceptives, and consumption of fibre, sugar, coffee, and eggs and mutually adjusted with variables in analysis                             |                                                                                                                                                                                                                       |                                                                                                          |
|                               |                             |                               | 795                                                                          | CD                                                  | Infancy   | 0.19*              | 0.41-0.81             | Adjusted for age, sex, cigarette smoking and family history of BD                                                                                                                                                    |                                                                                                                                                                                                                       |                                                                                                          |
|                               |                             |                               | 795                                                                          | CD                                                  | Infancy   | 0.09*              | 0.04-0.24             | Adjusted for age, sex, cigarette smoking and family history of BD                                                                                                                                                    |                                                                                                                                                                                                                       |                                                                                                          |
|                               |                             |                               | 795                                                                          | CD                                                  | 0-5 yrs   | 0.95*              | 0.18-0.68             | Adjusted for age, sex, cigarette smoking and family history of BD                                                                                                                                                    |                                                                                                                                                                                                                       |                                                                                                          |
|                               |                             |                               | 795                                                                          | CD                                                  | 0-5 yrs   | 0.12*              | 0.05-0.30             | Adjusted for age, sex, cigarette smoking and family history of BD                                                                                                                                                    |                                                                                                                                                                                                                       |                                                                                                          |
|                               |                             |                               | 795                                                                          | CD                                                  | Infancy   | 0.28*              | 0.13-0.64             | Adjusted for age, sex, cigarette smoking and family history of BD                                                                                                                                                    |                                                                                                                                                                                                                       |                                                                                                          |
|                               |                             |                               | 795                                                                          | CD                                                  | Infancy   | 0.44*              | 0.07-0.93             | Adjusted for age, sex, cigarette smoking and family history of BD                                                                                                                                                    |                                                                                                                                                                                                                       |                                                                                                          |
| Ho, Y. et al. 2005            | Australia                   | Not Reported                  | 795                                                                          | CD                                                  | 0-5 yrs   | 0.26*              | 0.11-0.63             | Adjusted for age, sex, cigarette smoking and family history of BD                                                                                                                                                    |                                                                                                                                                                                                                       |                                                                                                          |
|                               |                             |                               | 795                                                                          | CD                                                  | 0-5 yrs   | 0.27*              | 0.13-0.57             | Adjusted for age, sex, cigarette smoking and family history of BD                                                                                                                                                    |                                                                                                                                                                                                                       |                                                                                                          |
|                               |                             |                               | 795                                                                          | CD                                                  | Infancy   | 0.12*              | 0.03-0.43             | Adjusted for age, sex, cigarette smoking and family history of BD                                                                                                                                                    |                                                                                                                                                                                                                       |                                                                                                          |
|                               |                             |                               | 795                                                                          | CD                                                  | Infancy   | 0.13*              | 0.04-0.44             | Adjusted for age, sex, cigarette smoking and family history of BD                                                                                                                                                    |                                                                                                                                                                                                                       |                                                                                                          |
|                               |                             |                               | 795                                                                          | CD                                                  | 0-5 yrs   | 0.1*               | 0.05-0.50             | Adjusted for age, sex, cigarette smoking and family history of BD                                                                                                                                                    |                                                                                                                                                                                                                       |                                                                                                          |
|                               |                             |                               | 795                                                                          | CD                                                  | 0-5 yrs   | 0.12*              | 0.04-0.40             | Adjusted for age, sex, cigarette smoking and family history of BD                                                                                                                                                    |                                                                                                                                                                                                                       |                                                                                                          |
|                               |                             |                               | 795                                                                          | CD                                                  | Infancy   | 0.47*              | 0.21-1.04             | Adjusted for age, sex, cigarette smoking and family history of BD                                                                                                                                                    |                                                                                                                                                                                                                       |                                                                                                          |
|                               |                             |                               | 795                                                                          | CD                                                  | Infancy   | 0.67*              | 0.28-1.23             | Adjusted for age, sex, cigarette smoking and family history of BD                                                                                                                                                    |                                                                                                                                                                                                                       |                                                                                                          |
|                               |                             |                               | 795                                                                          | CD                                                  | 0-5 yrs   | 0.37*              | 0.16-0.80             | Adjusted for age, sex, cigarette smoking and family history of BD                                                                                                                                                    |                                                                                                                                                                                                                       |                                                                                                          |
|                               |                             |                               | 795                                                                          | CD                                                  | 0-5 yrs   | 0.4*               | 0.19-0.97             | Adjusted for age, sex, cigarette smoking and family history of BD                                                                                                                                                    |                                                                                                                                                                                                                       |                                                                                                          |
| Kang, L.C. et al. 2012        | South India                 | Not Reported                  | 795                                                                          | CD                                                  | Infancy   | 0.12*              | 0.04-0.37             | Adjusted for age, sex, cigarette smoking and family history of BD                                                                                                                                                    |                                                                                                                                                                                                                       |                                                                                                          |
|                               |                             |                               | 795                                                                          | CD                                                  | Infancy   | 0.1*               | 0.05-0.46             | Adjusted for age, sex, cigarette smoking and family history of BD                                                                                                                                                    |                                                                                                                                                                                                                       |                                                                                                          |
|                               |                             |                               | 795                                                                          | CD                                                  | 0-5 yrs   | 0.1*               | 0.03-0.30             | Adjusted for age, sex, cigarette smoking and family history of BD                                                                                                                                                    |                                                                                                                                                                                                                       |                                                                                                          |
|                               |                             |                               | 795                                                                          | CD                                                  | 0-5 yrs   | 0.13*              | 0.05-0.35             | Adjusted for age, sex, cigarette smoking and family history of BD                                                                                                                                                    |                                                                                                                                                                                                                       |                                                                                                          |
|                               |                             |                               | 795                                                                          | CD                                                  | Infancy   | 1.71*              | 0.68-4.30             | Adjusted for age, sex, cigarette smoking and family history of BD                                                                                                                                                    |                                                                                                                                                                                                                       |                                                                                                          |
|                               |                             |                               | 795                                                                          | CD                                                  | Infancy   | 1.80*              | 0.78-4.36             | Adjusted for age, sex, cigarette smoking and family history of BD                                                                                                                                                    |                                                                                                                                                                                                                       |                                                                                                          |
|                               |                             |                               | 795                                                                          | CD                                                  | 0-5 yrs   | 1.56*              | 0.43-5.87             | Adjusted for age, sex, cigarette smoking and family history of BD                                                                                                                                                    |                                                                                                                                                                                                                       |                                                                                                          |
|                               |                             |                               | 795                                                                          | CD                                                  | 0-5 yrs   | 1.69*              | 0.71-3.99             | Adjusted for age, sex, cigarette smoking and family history of BD                                                                                                                                                    |                                                                                                                                                                                                                       |                                                                                                          |
|                               |                             |                               | 634                                                                          | BD                                                  | 0-5 yrs   | Not reported       | Not reported          |                                                                                                                                                                                                                      |                                                                                                                                                                                                                       |                                                                                                          |
|                               |                             |                               | 634                                                                          | BD                                                  | 0-5 yrs   | Not reported       | Not reported          |                                                                                                                                                                                                                      |                                                                                                                                                                                                                       |                                                                                                          |
| Makizadeh, F. et al. 2009     | Tehran, Iran                | 1998 to 2004                  | 406                                                                          | CD                                                  | 0-5 yrs   | 2.08*              | 1.04-2.25             | Adjusted for sex, tobacco use and current age                                                                                                                                                                        |                                                                                                                                                                                                                       |                                                                                                          |
|                               |                             |                               | 1933                                                                         | CD                                                  | Infancy   | 1*                 | 0.8-1.3               | Adjusted for study region, age in quartiles, gender, duration of exclusive breastfeeding, parental history of BD, number of older siblings, highest parental education and maternal smoking during pregnancy         |                                                                                                                                                                                                                       |                                                                                                          |
|                               |                             |                               | 1933                                                                         | CD                                                  | Infancy   | 0.9*               | 0.6-1.2               | Adjusted for study region, age in quartiles, gender, duration of exclusive breastfeeding, parental history of BD, number of older siblings, highest parental education and maternal smoking during pregnancy         |                                                                                                                                                                                                                       |                                                                                                          |
|                               |                             |                               | 1933                                                                         | CD                                                  | Infancy   | 0.5*               | 0.3-0.9               | Adjusted for study region, age in quartiles, gender, duration of exclusive breastfeeding, parental history of BD, number of older siblings, highest parental education and maternal smoking during pregnancy         |                                                                                                                                                                                                                       |                                                                                                          |
|                               |                             |                               | 1933                                                                         | CD                                                  | 0-5 yrs   | 0.37*              | 0.16-0.80             | Adjusted for study region, age in quartiles, gender, duration of exclusive breastfeeding, parental history of BD, number of older siblings, highest parental education and maternal smoking during pregnancy         |                                                                                                                                                                                                                       |                                                                                                          |
|                               |                             |                               | 330                                                                          | CD                                                  | 0-5 yrs   | 0.36*              | 0.19-0.69             | Adjusted for study region, age in quartiles, gender, duration of exclusive breastfeeding, parental history of BD, number of older siblings, highest parental education and maternal smoking during pregnancy         |                                                                                                                                                                                                                       |                                                                                                          |
|                               |                             |                               | 330                                                                          | CD                                                  | 0-5 yrs   | 0.55*              | 0.30-0.99             | Adjusting variables not reported                                                                                                                                                                                     |                                                                                                                                                                                                                       |                                                                                                          |
|                               |                             |                               | 330                                                                          | CD                                                  | 0-5 yrs   | Not reported       | Not reported          |                                                                                                                                                                                                                      |                                                                                                                                                                                                                       |                                                                                                          |
|                               |                             |                               | 330                                                                          | CD                                                  | 0-5 yrs   | 3.13*              | 1.48-6.90             | Adjusting variables not reported                                                                                                                                                                                     |                                                                                                                                                                                                                       |                                                                                                          |
|                               |                             |                               | 330                                                                          | CD                                                  | 0-5 yrs   | Not reported       | Not reported          |                                                                                                                                                                                                                      |                                                                                                                                                                                                                       |                                                                                                          |
| Radon, K. et al. 2007         | Germany                     | March 2006 and August 2006    | 330                                                                          | CD                                                  | 0-5 yrs   | 0.27*              | 0.087-0.884           | Adjusting variables not reported                                                                                                                                                                                     |                                                                                                                                                                                                                       |                                                                                                          |
|                               |                             |                               | 330                                                                          | CD                                                  | 0-5 yrs   | Not reported       | Not reported          |                                                                                                                                                                                                                      |                                                                                                                                                                                                                       |                                                                                                          |
|                               |                             |                               | 330                                                                          | CD                                                  | 0-5 yrs   | Not reported       | Not reported          |                                                                                                                                                                                                                      |                                                                                                                                                                                                                       |                                                                                                          |
|                               |                             |                               | 330                                                                          | CD                                                  | 0-5 yrs   | Not reported       | Not reported          |                                                                                                                                                                                                                      |                                                                                                                                                                                                                       |                                                                                                          |
|                               |                             |                               | 330                                                                          | CD                                                  | 0-5 yrs   | Not reported       | Not reported          |                                                                                                                                                                                                                      |                                                                                                                                                                                                                       |                                                                                                          |
|                               |                             |                               | 330                                                                          | CD                                                  | 0-5 yrs   | Not reported       | Not reported          |                                                                                                                                                                                                                      |                                                                                                                                                                                                                       |                                                                                                          |
|                               |                             |                               | 330                                                                          | CD                                                  | 0-5 yrs   | Not reported       | Not reported          |                                                                                                                                                                                                                      |                                                                                                                                                                                                                       |                                                                                                          |
|                               |                             |                               | 330                                                                          | CD                                                  | 0-5 yrs   | Not reported       | Not reported          |                                                                                                                                                                                                                      |                                                                                                                                                                                                                       |                                                                                                          |
|                               |                             |                               | 330                                                                          | CD                                                  | 0-5 yrs   | Not reported       | Not reported          |                                                                                                                                                                                                                      |                                                                                                                                                                                                                       |                                                                                                          |
|                               |                             |                               | 330                                                                          | CD                                                  | 0-5 yrs   | Not reported       | Not reported          |                                                                                                                                                                                                                      |                                                                                                                                                                                                                       |                                                                                                          |
| Ramakrishna, B.S. et al. 2012 | South India                 | Not Reported                  | 330                                                                          | CD                                                  | 0-5 yrs   | 0.55*              | 0.30-0.99             | Adjusting variables not reported                                                                                                                                                                                     |                                                                                                                                                                                                                       |                                                                                                          |
|                               |                             |                               | 330                                                                          | CD                                                  | 0-5 yrs   | Not reported       | Not reported          |                                                                                                                                                                                                                      |                                                                                                                                                                                                                       |                                                                                                          |
|                               |                             |                               | 330                                                                          | CD                                                  | 0-5 yrs   | 3.13*              | 1.48-6.90             | Adjusting variables not reported                                                                                                                                                                                     |                                                                                                                                                                                                                       |                                                                                                          |
|                               |                             |                               | 330                                                                          | CD                                                  | 0-5 yrs   | Not reported       | Not reported          |                                                                                                                                                                                                                      |                                                                                                                                                                                                                       |                                                                                                          |
| Saha, M.K. et al. 2010        | South India                 | Not Reported                  | 330                                                                          | CD                                                  | 0-5 yrs   | 0.27*              | 0.087-0.884           | Adjusting variables not reported                                                                                                                                                                                     |                                                                                                                                                                                                                       |                                                                                                          |
|                               |                             |                               | 330                                                                          | CD                                                  | 0-5 yrs   | Not reported       | Not reported          |                                                                                                                                                                                                                      |                                                                                                                                                                                                                       |                                                                                                          |
|                               |                             |                               | 330                                                                          | CD                                                  | 0-5 yrs   | Not reported       | Not reported          |                                                                                                                                                                                                                      |                                                                                                                                                                                                                       |                                                                                                          |
|                               |                             |                               | 330                                                                          | CD                                                  | 0-5 yrs   | Not reported       | Not reported          |                                                                                                                                                                                                                      |                                                                                                                                                                                                                       |                                                                                                          |
| Samuelsson, S.M. et al. 1991  | Zapala county, Sweden       | 1945-1964                     | 330                                                                          | CD                                                  | 0-5 yrs   | 0.27*              | 0.087-0.884           | Adjusting variables not reported                                                                                                                                                                                     |                                                                                                                                                                                                                       |                                                                                                          |
|                               |                             |                               | 330                                                                          | CD                                                  | 0-5 yrs   | Not reported       | Not reported          |                                                                                                                                                                                                                      |                                                                                                                                                                                                                       |                                                                                                          |
|                               |                             |                               | 330                                                                          | CD                                                  | 0-5 yrs   | Not reported       | Not reported          |                                                                                                                                                                                                                      |                                                                                                                                                                                                                       |                                                                                                          |
|                               |                             |                               | 330                                                                          | CD                                                  | 0-5 yrs   | Not reported       | Not reported          |                                                                                                                                                                                                                      |                                                                                                                                                                                                                       |                                                                                                          |
| Strickling, C. et al. 2011    | Italy                       | 2000-2014                     | 330                                                                          | CD                                                  | 0-5 yrs   | 0.27*              | 0.087-0.884           | Adjusting variables not reported                                                                                                                                                                                     |                                                                                                                                                                                                                       |                                                                                                          |
|                               |                             |                               | 330                                                                          | CD                                                  | 0-5 yrs   | Not reported       | Not reported          |                                                                                                                                                                                                                      |                                                                                                                                                                                                                       |                                                                                                          |
| Thompson, N.P. et al. 1995    | England and Wales           | 1950-1968                     | 330                                                                          | CD                                                  | 0-5 yrs   | 0.27*              | 0.087-0.884           | Adjusting variables not reported                                                                                                                                                                                     |                                                                                                                                                                                                                       |                                                                                                          |
|                               |                             |                               | 330                                                                          | CD                                                  | 0-5 yrs   | Not reported       | Not reported          |                                                                                                                                                                                                                      |                                                                                                                                                                                                                       |                                                                                                          |
| Thompson, N.P. et al. 2000    | UK                          | 1946-1958                     | 330                                                                          | CD                                                  | 0-5 yrs   | 0.27*              | 0.087-0.884           | Adjusting variables not reported                                                                                                                                                                                     |                                                                                                                                                                                                                       |                                                                                                          |
|                               |                             |                               | 330                                                                          | CD                                                  | 0-5 yrs   | Not reported       | Not reported          |                                                                                                                                                                                                                      |                                                                                                                                                                                                                       |                                                                                                          |
| van der Sluis, K. et al. 2020 | Netherlands                 | Not Reported                  | 330                                                                          | CD                                                  | 0-5 yrs   | 0.27*              | 0.087-0.884           | Adjusting variables not reported                                                                                                                                                                                     |                                                                                                                                                                                                                       |                                                                                                          |
|                               |                             |                               | 330                                                                          | CD                                                  | 0-5 yrs   | Not reported       | Not reported          |                                                                                                                                                                                                                      |                                                                                                                                                                                                                       |                                                                                                          |
|                               |                             |                               | 330                                                                          | CD                                                  | 0-5 yrs   | Not reported       | Not reported          |                                                                                                                                                                                                                      |                                                                                                                                                                                                                       |                                                                                                          |
|                               |                             |                               | 330                                                                          | CD                                                  | 0-5 yrs</ |                    |                       |                                                                                                                                                                                                                      |                                                                                                                                                                                                                       |                                                                                                          |

| Reference #                   | Authors                       | Study location                 | Study Time Period                                                               | Exposure Description    | Total sample size (n)   | CD/UC/IBD                    | Period of exposure                               | Effect estimate value                                                                                      | Confidence interval (specify if different from 95% CI)                                                                                                                                                              | Comments |                   |           |                                                                                                                        |
|-------------------------------|-------------------------------|--------------------------------|---------------------------------------------------------------------------------|-------------------------|-------------------------|------------------------------|--------------------------------------------------|------------------------------------------------------------------------------------------------------------|---------------------------------------------------------------------------------------------------------------------------------------------------------------------------------------------------------------------|----------|-------------------|-----------|------------------------------------------------------------------------------------------------------------------------|
| <b>Cohort Studies</b>         |                               |                                |                                                                                 |                         |                         |                              |                                                  |                                                                                                            |                                                                                                                                                                                                                     |          |                   |           |                                                                                                                        |
| Aspberg, S. et al. 2006       | Sweden                        | 1987-2000                      | Maternal education (Comprehensive school compared with continuation school)     | 1479216                 | CD                      | 0-5 yrs                      | 1.09 <sup>†</sup>                                | 0.66-1.81                                                                                                  | Unadjusted estimates reported                                                                                                                                                                                       |          |                   |           |                                                                                                                        |
|                               |                               |                                |                                                                                 | 1479216                 | UC                      | 0-5 yrs                      | 0.97 <sup>†</sup>                                | 0.69-1.37                                                                                                  | Unadjusted estimates reported                                                                                                                                                                                       |          |                   |           |                                                                                                                        |
|                               |                               |                                |                                                                                 | 1479216                 | CD                      | 0-5 yrs                      | 1.24 <sup>†</sup>                                | 0.84-1.84                                                                                                  | Unadjusted estimates reported                                                                                                                                                                                       |          |                   |           |                                                                                                                        |
| Ponsonby, A.L. et al. 2009    | Australia                     | 1983-1998                      | Maternal education (University or equivalent compared with continuation school) | 1479216                 | UC                      | 0-5 yrs                      | 0.99 <sup>†</sup>                                | 0.74-1.34                                                                                                  | Unadjusted estimates reported                                                                                                                                                                                       |          |                   |           |                                                                                                                        |
|                               |                               |                                |                                                                                 | 998877                  | CD                      | Perinatal                    | 1.73 <sup>†</sup>                                | 1.10-2.71                                                                                                  | Adjusted for sex, abnormality, interventional birth, urban, married, SES, maternal age and year of birth                                                                                                            |          |                   |           |                                                                                                                        |
|                               |                               |                                |                                                                                 | 252084                  | CD                      | Perinatal                    | 1.12 <sup>†</sup>                                | 0.78-1.61                                                                                                  | Adjusted for sex, abnormality, interventional birth, urban, married, SES, maternal age and year of birth                                                                                                            |          |                   |           |                                                                                                                        |
|                               |                               |                                |                                                                                 | 248158                  | CD                      | Perinatal                    | 1.06 <sup>†</sup>                                | 0.73-1.53                                                                                                  | Adjusted for sex, abnormality, interventional birth, urban, married, SES, maternal age and year of birth                                                                                                            |          |                   |           |                                                                                                                        |
|                               |                               |                                | SES index mid compared with low                                                 | 248492                  | CD                      | Perinatal                    | 1.47 <sup>†</sup>                                | 1.04-2.07                                                                                                  | Adjusted for sex, abnormality, interventional birth, urban, married, SES, maternal age and year of birth                                                                                                            |          |                   |           |                                                                                                                        |
|                               |                               |                                | SES index high compared with low                                                |                         |                         |                              |                                                  |                                                                                                            |                                                                                                                                                                                                                     |          |                   |           |                                                                                                                        |
|                               |                               |                                | SES index very high compared with low                                           |                         |                         |                              |                                                  |                                                                                                            |                                                                                                                                                                                                                     |          |                   |           |                                                                                                                        |
| <b>Case-Control Studies</b>   |                               |                                |                                                                                 |                         |                         |                              |                                                  |                                                                                                            |                                                                                                                                                                                                                     |          |                   |           |                                                                                                                        |
| Amre, D.K. et al. 2006        | Montreal, Canada              | 1995-2004                      | Daycare birth-6 mos                                                             | 388                     | CD                      | Infancy                      | 4.5 <sup>†</sup>                                 | 1.4-13.7                                                                                                   | Adjusted for age, gender, family history of IBD, maternal smoking and social class (via maternal education)                                                                                                         |          |                   |           |                                                                                                                        |
|                               |                               |                                |                                                                                 | 388                     | CD                      | Infancy                      | 1.5 <sup>†</sup>                                 | 0.8-2.9                                                                                                    | Adjusted for age, gender, family history of IBD, maternal smoking and social class (via maternal education)                                                                                                         |          |                   |           |                                                                                                                        |
|                               |                               |                                |                                                                                 | 388                     | CD                      | 0-5 yrs                      | 1.1 <sup>†</sup>                                 | 0.5-1.6                                                                                                    | Adjusted for age, gender, family history of IBD, maternal smoking and social class (via maternal education)                                                                                                         |          |                   |           |                                                                                                                        |
|                               |                               |                                |                                                                                 | 388                     | CD                      | 0-5 yrs                      | Not Reported                                     | N/A                                                                                                        |                                                                                                                                                                                                                     |          |                   |           |                                                                                                                        |
|                               |                               |                                |                                                                                 | 388                     | CD                      | 0-5 yrs                      | Not Reported                                     | N/A                                                                                                        |                                                                                                                                                                                                                     |          |                   |           |                                                                                                                        |
|                               |                               |                                |                                                                                 | 388                     | CD                      | Birth                        | Not Reported                                     | N/A                                                                                                        |                                                                                                                                                                                                                     |          |                   |           |                                                                                                                        |
| Basson, A. et al. 2014        | South Africa                  | September 2011 to January 2013 | Daycare birth-6 mos                                                             | 407                     | CD                      | Infancy                      | 0.61 <sup>†</sup>                                | 0.35-1.06                                                                                                  | Adjusted for age at study enrolment, gender and ethnicity                                                                                                                                                           |          |                   |           |                                                                                                                        |
| Bernstein, C.N. et al. 2019   | Canada                        | 1970-2010                      | Socioeconomic status Q4                                                         | 12159                   | IBD                     | Perinatal                    | 1.37 <sup>†</sup>                                | 1.06-1.77                                                                                                  | Unadjusted estimates reported                                                                                                                                                                                       |          |                   |           |                                                                                                                        |
|                               |                               |                                |                                                                                 | 12159                   | IBD                     | Perinatal                    | 1.35 <sup>†</sup>                                | 1.01-1.79                                                                                                  | Unadjusted estimates reported                                                                                                                                                                                       |          |                   |           |                                                                                                                        |
| Boneberger, A. et al. 2011    | Central South of Chile        | June 2009 to February 2010     | High paternal education                                                         | 126                     | UC                      | 0-5 yrs                      | 2.1 <sup>†</sup>                                 | 1.0-4.5                                                                                                    | Adjusted for age (<18 years/N18 years), sex (male/female), and rural place of living in the first year of life and mutually adjusted for Mapuche descent, high paternal education, pets, at least one older sibling |          |                   |           |                                                                                                                        |
|                               |                               |                                |                                                                                 | 226                     | UC                      | Infancy                      | Not Reported                                     | N/A                                                                                                        |                                                                                                                                                                                                                     |          |                   |           |                                                                                                                        |
| Canova, C. et al. 2020        | Italy                         | 1989-2012                      | Maternal education (Primary vs High school)                                     | 1586                    | IBD                     | Perinatal                    | 1.23 <sup>†</sup>                                | 0.87-1.76                                                                                                  | Adjusted for sex, year of birth, season of birth, having older siblings, number of births, birth weight, gestational age, Apgar score at 1 minute, maternal age and mother's education                              |          |                   |           |                                                                                                                        |
|                               |                               |                                |                                                                                 | 946                     | IBD                     | Perinatal                    | 0.96 <sup>†</sup>                                | 0.53-1.76                                                                                                  | Adjusted for sex, year of birth, season of birth, having older siblings, number of births, birth weight, gestational age, Apgar score at 1 minute, maternal age and mother's education                              |          |                   |           |                                                                                                                        |
| Doyle, J.B. et al. 2017       | Northern Ireland              | 1971-1986                      | Socioeconomic Status                                                            | 67173                   | IBD                     | Neonatal                     | Not Significant                                  | N/A                                                                                                        |                                                                                                                                                                                                                     |          |                   |           |                                                                                                                        |
| Eslahpazir, J. et al. 2017    | Montreal, Canada              | 1980-2010                      | Maternal education                                                              | 891                     | CD                      | 0-5 yrs                      | Not Reported                                     | Adjustment not reported/not applicable. Higher education was associated with lower odds of CD              |                                                                                                                                                                                                                     |          |                   |           |                                                                                                                        |
|                               |                               |                                |                                                                                 | 801                     | CD                      | 0-5 yrs                      | Not Reported                                     | Adjustment not reported/not applicable. Higher education was associated with lower odds of CD              |                                                                                                                                                                                                                     |          |                   |           |                                                                                                                        |
| Feeney, M.A. et al. 2002      | UK                            | Not Reported                   | Social class 1 or 2                                                             | 278                     | CD                      | 0-5 yrs                      | 0.76 <sup>†</sup>                                | 0.18-3.40                                                                                                  | Unadjusted estimates reported                                                                                                                                                                                       |          |                   |           |                                                                                                                        |
|                               |                               |                                |                                                                                 | 274                     | UC                      | 0-5 yrs                      | 2.49 <sup>†</sup>                                | 0.65-9.54                                                                                                  | Unadjusted estimates reported                                                                                                                                                                                       |          |                   |           |                                                                                                                        |
|                               |                               |                                |                                                                                 | 278                     | CD                      | 0-5 yrs                      | 0.49 <sup>†</sup>                                | 0.14-1.78                                                                                                  | Unadjusted estimates reported                                                                                                                                                                                       |          |                   |           |                                                                                                                        |
|                               |                               |                                |                                                                                 | 274                     | UC                      | 0-5 yrs                      | 1.71 <sup>†</sup>                                | 0.46-6.36                                                                                                  | Unadjusted estimates reported                                                                                                                                                                                       |          |                   |           |                                                                                                                        |
|                               |                               |                                |                                                                                 | 278                     | CD                      | 0-5 yrs                      | 0.5 <sup>†</sup>                                 | 0.14-1.83                                                                                                  | Unadjusted estimates reported                                                                                                                                                                                       |          |                   |           |                                                                                                                        |
|                               |                               |                                |                                                                                 | 274                     | UC                      | 0-5 yrs                      | 1.19 <sup>†</sup>                                | 0.31-4.56                                                                                                  | Unadjusted estimates reported                                                                                                                                                                                       |          |                   |           |                                                                                                                        |
|                               |                               |                                |                                                                                 | 278                     | CD                      | 0-5 yrs                      | 0.63 <sup>†</sup>                                | 0.28-1.39                                                                                                  | Unadjusted estimates reported                                                                                                                                                                                       |          |                   |           |                                                                                                                        |
|                               |                               |                                |                                                                                 | 274                     | UC                      | 0-5 yrs                      | 0.5 <sup>†</sup>                                 | 0.22-1.16                                                                                                  | Unadjusted estimates reported                                                                                                                                                                                       |          |                   |           |                                                                                                                        |
|                               |                               |                                |                                                                                 | 278                     | CD                      | 0-5 yrs                      | 1.92 <sup>†</sup>                                | 0.87-4.22                                                                                                  | Unadjusted estimates reported                                                                                                                                                                                       |          |                   |           |                                                                                                                        |
|                               |                               |                                |                                                                                 | 274                     | UC                      | 0-5 yrs                      | 1.48 <sup>†</sup>                                | 0.75-2.91                                                                                                  | Unadjusted estimates reported                                                                                                                                                                                       |          |                   |           |                                                                                                                        |
|                               |                               |                                |                                                                                 | 278                     | CD                      | 0-5 yrs                      | 2.9 <sup>†</sup>                                 | 1.21-6.91                                                                                                  | Unadjusted estimates reported                                                                                                                                                                                       |          |                   |           |                                                                                                                        |
|                               |                               |                                |                                                                                 | 274                     | UC                      | 0-5 yrs                      | 1.19 <sup>†</sup>                                | 0.55-2.58                                                                                                  | Unadjusted estimates reported                                                                                                                                                                                       |          |                   |           |                                                                                                                        |
|                               |                               |                                |                                                                                 | 278                     | CD                      | 0-5 yrs                      | 1.62 <sup>†</sup>                                | 0.57-4.58                                                                                                  | Unadjusted estimates reported                                                                                                                                                                                       |          |                   |           |                                                                                                                        |
|                               |                               |                                |                                                                                 | 274                     | UC                      | 0-5 yrs                      | 0.44 <sup>†</sup>                                | 0.15-1.31                                                                                                  | Unadjusted estimates reported                                                                                                                                                                                       |          |                   |           |                                                                                                                        |
|                               |                               |                                |                                                                                 | 278                     | CD                      | 0-5 yrs                      | 0.6 <sup>†</sup>                                 | 0.26-1.38                                                                                                  | Unadjusted estimates reported                                                                                                                                                                                       |          |                   |           |                                                                                                                        |
|                               |                               |                                |                                                                                 | 274                     | UC                      | 0-5 yrs                      | 0.53 <sup>†</sup>                                | 0.25-1.14                                                                                                  | Unadjusted estimates reported                                                                                                                                                                                       |          |                   |           |                                                                                                                        |
|                               |                               |                                |                                                                                 | 278                     | CD                      | 0-5 yrs                      | 1.39 <sup>†</sup>                                | 0.64-3.00                                                                                                  | Unadjusted estimates reported                                                                                                                                                                                       |          |                   |           |                                                                                                                        |
|                               |                               |                                |                                                                                 | 274                     | UC                      | 0-5 yrs                      | 0.8 <sup>†</sup>                                 | 0.34-1.87                                                                                                  | Unadjusted estimates reported                                                                                                                                                                                       |          |                   |           |                                                                                                                        |
|                               |                               |                                |                                                                                 | 278                     | CD                      | 0-5 yrs                      | 1.78 <sup>†</sup>                                | 0.79-4.01                                                                                                  | Unadjusted estimates reported                                                                                                                                                                                       |          |                   |           |                                                                                                                        |
|                               |                               |                                |                                                                                 | 274                     | UC                      | 0-5 yrs                      | 0.92 <sup>†</sup>                                | 0.45-1.87                                                                                                  | Unadjusted estimates reported                                                                                                                                                                                       |          |                   |           |                                                                                                                        |
|                               |                               |                                |                                                                                 | Geary, R.B. et al. 2010 | Canterbury, New Zealand | June 1, 2003 to May 30, 2005 | Social class at birth- class 3-4 (ref class 1-2) | 1238                                                                                                       | CD                                                                                                                                                                                                                  | Birth    | 0.55 <sup>†</sup> | 0.41-0.75 | Adjusted for family history of IBD, smoking status, age at recruitment, social class at birth, ethnic identity and sex |
|                               |                               |                                |                                                                                 |                         |                         |                              |                                                  | 1253                                                                                                       | UC                                                                                                                                                                                                                  | Birth    | 0.65 <sup>†</sup> | 0.48-0.88 | Adjusted for family history of IBD, smoking status, age at recruitment, social class at birth, ethnic identity and sex |
|                               |                               |                                |                                                                                 |                         |                         |                              |                                                  | 1238                                                                                                       | CD                                                                                                                                                                                                                  | Birth    | 0.74 <sup>†</sup> | 0.5-1.1   | Adjusted for family history of IBD, smoking status, age at recruitment, social class at birth, ethnic identity and sex |
|                               |                               |                                |                                                                                 |                         |                         |                              |                                                  | 1253                                                                                                       | UC                                                                                                                                                                                                                  | Birth    | 0.59 <sup>†</sup> | 0.4-0.88  | Adjusted for family history of IBD, smoking status, age at recruitment, social class at birth, ethnic identity and sex |
| 1238                          | CD                            | Infancy                        | 0.82 <sup>†</sup>                                                               |                         |                         |                              |                                                  | 0.62-1.08                                                                                                  | Adjusted for family history of IBD, smoking status, age at recruitment, social class at birth, ethnic identity and sex                                                                                              |          |                   |           |                                                                                                                        |
| 1253                          | UC                            | Infancy                        | 0.83 <sup>†</sup>                                                               |                         |                         |                              |                                                  | 0.63-1.09                                                                                                  | Adjusted for family history of IBD, smoking status, age at recruitment, social class at birth, ethnic identity and sex                                                                                              |          |                   |           |                                                                                                                        |
| 1238                          | CD                            | Infancy                        | 1.12 <sup>†</sup>                                                               |                         |                         |                              |                                                  | 0.86-1.45                                                                                                  | Adjusted for family history of IBD, smoking status, age at recruitment, social class at birth, ethnic identity and sex                                                                                              |          |                   |           |                                                                                                                        |
| 1253                          | UC                            | Infancy                        | 1.24 <sup>†</sup>                                                               |                         |                         |                              |                                                  | 0.96-1.61                                                                                                  | Adjusted for family history of IBD, smoking status, age at recruitment, social class at birth, ethnic identity and sex                                                                                              |          |                   |           |                                                                                                                        |
| 1238                          | CD                            | Infancy                        | 0.84 <sup>†</sup>                                                               |                         |                         |                              |                                                  | 0.65-1.08                                                                                                  | Adjusted for family history of IBD, smoking status, age at recruitment, social class at birth, ethnic identity and sex                                                                                              |          |                   |           |                                                                                                                        |
| 1253                          | UC                            | Infancy                        | 0.72 <sup>†</sup>                                                               |                         |                         |                              |                                                  | 0.56-0.93                                                                                                  | Adjusted for family history of IBD, smoking status, age at recruitment, social class at birth, ethnic identity and sex                                                                                              |          |                   |           |                                                                                                                        |
| Gilat, T. et al. 1987         | International IBD Study group | Not Reported                   | primary school in mothers                                                       | 1497                    | CD                      | 0-5 yrs                      | Not reported                                     | N/A                                                                                                        |                                                                                                                                                                                                                     |          |                   |           |                                                                                                                        |
|                               |                               |                                |                                                                                 | 1497                    | UC                      | 0-5 yrs                      | lower odds                                       | not reported                                                                                               |                                                                                                                                                                                                                     |          |                   |           |                                                                                                                        |
|                               |                               |                                |                                                                                 | 1497                    | UC                      | 0-5 yrs                      | -0.71 <sup>†</sup>                               | 0.31-1.62                                                                                                  | Unadjusted estimates reported. Negative estimate as reported in the study.                                                                                                                                          |          |                   |           |                                                                                                                        |
|                               |                               |                                |                                                                                 | 1497                    | CD                      | 0-5 yrs                      | -0.67 <sup>†</sup>                               | 0.45-1.00                                                                                                  | Unadjusted estimates reported. Negative estimate as reported in the study.                                                                                                                                          |          |                   |           |                                                                                                                        |
| Hampe, J. et al. 2003         | Germany                       | July 1996 to January 1998      | Central heating                                                                 | 4815                    | IBD                     | 0-5 yrs                      | 1.31 <sup>†</sup>                                | 0.8-2.12                                                                                                   | Unadjusted estimates reported                                                                                                                                                                                       |          |                   |           |                                                                                                                        |
|                               |                               |                                |                                                                                 | 851                     | CD                      | 0-5 yrs                      | 1.86 <sup>†</sup>                                | 1.15-2.38                                                                                                  | Unadjusted estimates reported                                                                                                                                                                                       |          |                   |           |                                                                                                                        |
| Han, D.Y. et al. 2010         | New Zealand                   | Not Reported                   | >50% home carpeted                                                              | 851                     | CD                      | 0-5 yrs                      | 1.51 <sup>†</sup>                                | 1.2-2.6                                                                                                    | Unadjusted estimates reported                                                                                                                                                                                       |          |                   |           |                                                                                                                        |
|                               |                               |                                |                                                                                 | 851                     | CD                      | 0-5 yrs                      | 0.69 <sup>†</sup>                                | 0.35-1.35                                                                                                  | Unadjusted estimates reported                                                                                                                                                                                       |          |                   |           |                                                                                                                        |
|                               |                               |                                |                                                                                 | 851                     | CD                      | 0-5 yrs                      | 1.29 <sup>†</sup>                                | 0.96-1.73                                                                                                  | Unadjusted estimates reported                                                                                                                                                                                       |          |                   |           |                                                                                                                        |
| Holmes, E.A. et al. 2019      | Australia                     | 2010-2013                      | Father's education                                                              | 495                     | IBD                     | Prenatal                     | Not reported                                     | N/A                                                                                                        |                                                                                                                                                                                                                     |          |                   |           |                                                                                                                        |
|                               |                               |                                |                                                                                 | 495                     | IBD                     | Prenatal                     | Not reported                                     | N/A. IBD with higher "Trade cert or other", lower "University qualification" or "Secondary school or less" |                                                                                                                                                                                                                     |          |                   |           |                                                                                                                        |
| Ko, Y. et al. 2015            | Australia                     | Not Reported                   | Takeaway consumption in middle eastern migrants                                 | 795                     | UC                      | Infancy                      | 1.97 <sup>†</sup>                                | 0.03-2.88                                                                                                  | Adjusted for age, sex, cigarette smoking and family history of IBD                                                                                                                                                  |          |                   |           |                                                                                                                        |
|                               |                               |                                |                                                                                 | 795                     | UC                      | Infancy                      | 1.22 <sup>†</sup>                                | 0.56-2.34                                                                                                  | Adjusted for age, sex, cigarette smoking and family history of IBD                                                                                                                                                  |          |                   |           |                                                                                                                        |
|                               |                               |                                |                                                                                 | 795                     | UC                      | 0-5 yrs                      | 2.65 <sup>†</sup>                                | 0.09-0.86                                                                                                  | Adjusted for age, sex, cigarette smoking and family history of IBD                                                                                                                                                  |          |                   |           |                                                                                                                        |
|                               |                               |                                |                                                                                 | 795                     | UC                      | 0-5 yrs                      | 3.96 <sup>†</sup>                                | 0.19-6.18                                                                                                  | Adjusted for age, sex, cigarette smoking and family history of IBD                                                                                                                                                  |          |                   |           |                                                                                                                        |
| Lopez-Serrano, P. et al. 2010 | Spain                         | 2004                           | Parental occupation (higher skill level)                                        | 783                     | CD                      | 0-5 yrs                      | 1.83 <sup>†</sup>                                | 1.14-2.95                                                                                                  | Unadjusted estimates reported                                                                                                                                                                                       |          |                   |           |                                                                                                                        |
|                               |                               |                                |                                                                                 | 783                     | UC                      | 0-5 yrs                      | 2.04 <sup>†</sup>                                | 1.31-3.17                                                                                                  | Unadjusted estimates reported                                                                                                                                                                                       |          |                   |           |                                                                                                                        |
| Ramakrishna, B.S. et al. 2012 | USA and India                 | Not Reported                   | 0-5 yrs daycare                                                                 | 832                     | CD                      | 0-5 yrs                      | 0.083 <sup>†</sup>                               | 0.0181-0.811                                                                                               | Adjusting variables not reported                                                                                                                                                                                    |          |                   |           |                                                                                                                        |
|                               |                               |                                |                                                                                 | 826                     | UC                      | 0-5 yrs                      | Not reported                                     | N/A                                                                                                        |                                                                                                                                                                                                                     |          |                   |           |                                                                                                                        |
| Samuelsson, S.M. et al. 1991  | Uppsala County, Sweden        | 1945-1964                      | Paternal SES (middle vs high)                                                   | 334                     | UC                      | Birth                        | 0.87 <sup>†</sup>                                | 0.41-1.86                                                                                                  | Unadjusted estimates reported                                                                                                                                                                                       |          |                   |           |                                                                                                                        |
|                               |                               |                                |                                                                                 | 334                     | UC                      | Birth                        | 0.58 <sup>†</sup>                                | 0.21-1.57                                                                                                  | Unadjusted estimates reported                                                                                                                                                                                       |          |                   |           |                                                                                                                        |
|                               |                               |                                |                                                                                 | 334                     | UC                      | Birth                        | 2.6 <sup>†</sup>                                 | 0.56-13.88                                                                                                 | Unadjusted estimates reported                                                                                                                                                                                       |          |                   |           |                                                                                                                        |
|                               |                               |                                |                                                                                 | 334                     | UC                      | Birth                        | 0.66 <sup>†</sup>                                | 0.30-1.42                                                                                                  | Unadjusted estimates reported                                                                                                                                                                                       |          |                   |           |                                                                                                                        |
| Striscuglio, C. et al. 2017   | Campania, Southern Italy      | 2000-2014                      | Paternal SES (low vs high)                                                      | 334                     | UC                      | Birth                        | 0.27 <sup>†</sup>                                | 0.09-0.75                                                                                                  | Unadjusted estimates reported                                                                                                                                                                                       |          |                   |           |                                                                                                                        |
|                               |                               |                                |                                                                                 | 334                     | UC                      | Birth                        | 6.13 <sup>†</sup>                                | 1.08-34.53                                                                                                 | Unadjusted estimates reported                                                                                                                                                                                       |          |                   |           |                                                                                                                        |
|                               |                               |                                | Maternal degree                                                                 | 305                     | CD                      | 0-5 yrs                      | 5.5 <sup>†</sup>                                 | 2.5-11.6                                                                                                   | Adjusted for breast feeding, father's employment, gluten introduction, no. Of siblings, autoimmune diseases, pets and bed sharing                                                                                   |          |                   |           |                                                                                                                        |

| Study type                                                                                 | Study            | Study Location                                                | Study Time Period                                                                         | Exposure Description | Total sample size (n) | Outcome            | Period of Exposure | Effect estimate value                                                                                                                                                                                                                                                                             | Confidence interval (specify if different from 95% CI) | Comment |
|--------------------------------------------------------------------------------------------|------------------|---------------------------------------------------------------|-------------------------------------------------------------------------------------------|----------------------|-----------------------|--------------------|--------------------|---------------------------------------------------------------------------------------------------------------------------------------------------------------------------------------------------------------------------------------------------------------------------------------------------|--------------------------------------------------------|---------|
| Cohort Studies                                                                             |                  |                                                               |                                                                                           |                      |                       |                    |                    |                                                                                                                                                                                                                                                                                                   |                                                        |         |
| Agrawal, M. et al. 2020                                                                    | Denmark          | 1977-1995<br>1996-2003<br>2004-2009<br>2010-2014<br>2015-2018 | Second-Generation Immigrants                                                              | 870000 IBD           | Birth                 | 1.07 <sup>†</sup>  | 0.8-1.43           | Adjusted for sex, age (0-9, 10-14, 15-74 in 1-year intervals) and 275 years) and calendar time (1-year intervals).                                                                                                                                                                                |                                                        |         |
|                                                                                            |                  |                                                               |                                                                                           | 870000 IBD           | Birth                 | 0.69 <sup>†</sup>  | 0.56-0.86          |                                                                                                                                                                                                                                                                                                   |                                                        |         |
|                                                                                            |                  |                                                               |                                                                                           | 870000 IBD           | Birth                 | 0.78 <sup>††</sup> | 0.67-0.92          |                                                                                                                                                                                                                                                                                                   |                                                        |         |
|                                                                                            |                  |                                                               |                                                                                           | 870000 IBD           | Birth                 | 0.96 <sup>†</sup>  | 0.85-1.08          |                                                                                                                                                                                                                                                                                                   |                                                        |         |
|                                                                                            |                  |                                                               |                                                                                           | 870000 IBD           | Birth                 | 1.13 <sup>†</sup>  | 1.01-1.26          |                                                                                                                                                                                                                                                                                                   |                                                        |         |
|                                                                                            |                  |                                                               |                                                                                           | 870000 IBD           | Birth                 | 0.89 <sup>†</sup>  | 0.81-0.98          |                                                                                                                                                                                                                                                                                                   |                                                        |         |
|                                                                                            |                  |                                                               |                                                                                           | 870000 IBD           | Birth                 | 0.84 <sup>†</sup>  | 0.59-1.19          |                                                                                                                                                                                                                                                                                                   |                                                        |         |
|                                                                                            |                  |                                                               |                                                                                           | 870000 IBD           | Birth                 | 0.96 <sup>†</sup>  | 0.87-1.00          |                                                                                                                                                                                                                                                                                                   |                                                        |         |
|                                                                                            |                  |                                                               |                                                                                           | 870000 IBD           | Birth                 | 0.69 <sup>†</sup>  | 0.49-0.96          |                                                                                                                                                                                                                                                                                                   |                                                        |         |
|                                                                                            |                  |                                                               |                                                                                           | 870000 IBD           | Birth                 | 1.06 <sup>†</sup>  | 0.97-1.17          |                                                                                                                                                                                                                                                                                                   |                                                        |         |
|                                                                                            |                  |                                                               |                                                                                           | 870000 IBD           | Birth                 | 1.06 <sup>†</sup>  | 0.76-1.48          |                                                                                                                                                                                                                                                                                                   |                                                        |         |
|                                                                                            |                  |                                                               |                                                                                           | 870000 IBD           | Birth                 | 1.02 <sup>†</sup>  | 1.08-1.33          |                                                                                                                                                                                                                                                                                                   |                                                        |         |
|                                                                                            |                  |                                                               |                                                                                           | 870000 IBD           | Birth                 | 0.7 <sup>†</sup>   | 0.49-0.99          |                                                                                                                                                                                                                                                                                                   |                                                        |         |
|                                                                                            |                  |                                                               |                                                                                           | 870000 IBD           | 0-5 yrs               | 1.07 <sup>††</sup> | 0.9-1.27           |                                                                                                                                                                                                                                                                                                   |                                                        |         |
|                                                                                            |                  |                                                               |                                                                                           | 870000 CD            | 0-5 yrs               | 0.95 <sup>††</sup> | 0.72-1.26          |                                                                                                                                                                                                                                                                                                   |                                                        |         |
| 870000 UC                                                                                  | 0-5 yrs          | 1.14 <sup>††</sup>                                            | 0.92-1.42                                                                                 |                      |                       |                    |                    |                                                                                                                                                                                                                                                                                                   |                                                        |         |
| Ghersin, I. et al. 2019                                                                    | Israel           | 2002-2016                                                     | Maternal country of birth- Israel                                                         | 1144213 UC           | Birth                 | reference          |                    | Adjusting variables include age, gender and diagnosis. Other variables that were included by forward selection: country of origin (Israel, western countries, former USSR, Asia, Africa, Ethiopia), num- ber of children in the household (0-2, ≥3), and socioeconomic status (High, medium, low) |                                                        |         |
|                                                                                            |                  |                                                               | Maternal region of birth- West                                                            | 1144213 CD           | Birth                 | 1.2 <sup>††</sup>  | 1.09-1.32          |                                                                                                                                                                                                                                                                                                   |                                                        |         |
|                                                                                            |                  |                                                               | Maternal country of birth- Former USSR                                                    | 1144213 UC           | Birth                 | 0.69 <sup>††</sup> | 0.58-0.82          |                                                                                                                                                                                                                                                                                                   |                                                        |         |
|                                                                                            |                  |                                                               | Maternal country of birth- Former USSR                                                    | 1144213 CD           | Birth                 | 0.71 <sup>††</sup> | 0.6-0.82           |                                                                                                                                                                                                                                                                                                   |                                                        |         |
|                                                                                            |                  |                                                               | Maternal country of birth- Asia                                                           | 1144213 UC           | Birth                 | 0.55 <sup>††</sup> | 0.43-0.67          |                                                                                                                                                                                                                                                                                                   |                                                        |         |
|                                                                                            |                  |                                                               | Maternal country of birth- Asia                                                           | 1144213 CD           | Birth                 | 0.61 <sup>††</sup> | 0.5-0.73           |                                                                                                                                                                                                                                                                                                   |                                                        |         |
|                                                                                            |                  |                                                               | Maternal country of birth- North Africa                                                   | 1144213 UC           | Birth                 | 0.71 <sup>††</sup> | 0.60-0.82          |                                                                                                                                                                                                                                                                                                   |                                                        |         |
|                                                                                            |                  |                                                               | Maternal country of birth- North Africa                                                   | 1144213 CD           | Birth                 | 0.73 <sup>††</sup> | 0.66-0.85          |                                                                                                                                                                                                                                                                                                   |                                                        |         |
|                                                                                            |                  |                                                               | Maternal country of birth- Ethiopia                                                       | 1144213 UC           | Birth                 | 0.47 <sup>††</sup> | 0.37-0.57          |                                                                                                                                                                                                                                                                                                   |                                                        |         |
|                                                                                            |                  |                                                               | Maternal country of birth- Ethiopia                                                       | 1144213 CD           | Birth                 | 0.52 <sup>††</sup> | 0.43-0.62          |                                                                                                                                                                                                                                                                                                   |                                                        |         |
|                                                                                            |                  |                                                               | Maternal country of birth- Ethiopia                                                       | 1144213 UC           | Birth                 | 0.49 <sup>††</sup> | 0.33-0.67          |                                                                                                                                                                                                                                                                                                   |                                                        |         |
|                                                                                            |                  |                                                               | Paternal country of birth- Israel                                                         | 1144213 CD           | Birth                 | reference          |                    |                                                                                                                                                                                                                                                                                                   |                                                        |         |
|                                                                                            |                  |                                                               | Paternal region of birth- West                                                            | 1144213 UC           | Birth                 | 1.15 <sup>††</sup> | 1.002-1.33         |                                                                                                                                                                                                                                                                                                   |                                                        |         |
|                                                                                            |                  |                                                               | Paternal country of birth- Former USSR                                                    | 1144213 UC           | Birth                 | 0.77 <sup>††</sup> | 0.62-0.95          |                                                                                                                                                                                                                                                                                                   |                                                        |         |
|                                                                                            |                  |                                                               | Paternal country of birth- Former USSR                                                    | 1144213 CD           | Birth                 | 0.65 <sup>††</sup> | 0.54-0.77          |                                                                                                                                                                                                                                                                                                   |                                                        |         |
| Paternal country of birth- Asia                                                            | 1144213 UC       | Birth                                                         | 0.6 <sup>††</sup>                                                                         | 0.47-0.77            |                       |                    |                    |                                                                                                                                                                                                                                                                                                   |                                                        |         |
| Paternal country of birth- Asia                                                            | 1144213 CD       | Birth                                                         | 0.59 <sup>††</sup>                                                                        | 0.49-0.71            |                       |                    |                    |                                                                                                                                                                                                                                                                                                   |                                                        |         |
| Paternal country of birth- North Africa                                                    | 1144213 UC       | Birth                                                         | 0.66 <sup>††</sup>                                                                        | 0.52-0.84            |                       |                    |                    |                                                                                                                                                                                                                                                                                                   |                                                        |         |
| Paternal country of birth- North Africa                                                    | 1144213 CD       | Birth                                                         | 0.91 <sup>††</sup>                                                                        | 0.78-1.04            |                       |                    |                    |                                                                                                                                                                                                                                                                                                   |                                                        |         |
| Paternal country of birth- Ethiopia                                                        | 1144213 UC       | Birth                                                         | 0.67 <sup>††</sup>                                                                        | 0.52-0.85            |                       |                    |                    |                                                                                                                                                                                                                                                                                                   |                                                        |         |
| Paternal country of birth- Ethiopia                                                        | 1144213 CD       | Birth                                                         | 0.41 <sup>††</sup>                                                                        | 0.27-0.63            |                       |                    |                    |                                                                                                                                                                                                                                                                                                   |                                                        |         |
| Paternal country of birth- Ethiopia                                                        | 1144213 UC       | Birth                                                         | 0.23 <sup>††</sup>                                                                        | 0.10-0.48            |                       |                    |                    |                                                                                                                                                                                                                                                                                                   |                                                        |         |
| Benchimol, E.I. et al. 2015                                                                | Canada           | 1994-2009                                                     | All second-generation immigrants compared with children of nonimmigrants                  | 2144660 IBD          | Birth                 | 0.63 <sup>†</sup>  | 0.53-0.75          | Adjusted for age and sex                                                                                                                                                                                                                                                                          |                                                        |         |
|                                                                                            |                  |                                                               | 2144660 CD                                                                                | Birth                | 0.49 <sup>†</sup>     | 0.38-0.63          |                    |                                                                                                                                                                                                                                                                                                   |                                                        |         |
|                                                                                            |                  |                                                               | 2144660 UC                                                                                | Birth                | 0.78 <sup>†</sup>     | 0.60-1.01          |                    |                                                                                                                                                                                                                                                                                                   |                                                        |         |
|                                                                                            |                  |                                                               | Second-generation East Asia and Pacific compared with children of nonimmigrants           | 2144660 IBD          | Birth                 | 0.11 <sup>†</sup>  | 0.05-0.25          |                                                                                                                                                                                                                                                                                                   |                                                        |         |
|                                                                                            |                  |                                                               | 2144660 CD                                                                                | Birth                | 0.13 <sup>†</sup>     | 0.05-0.34          |                    |                                                                                                                                                                                                                                                                                                   |                                                        |         |
|                                                                                            |                  |                                                               | 2144660 UC                                                                                | Birth                | 0.1 <sup>†</sup>      | 0.03-0.41          |                    |                                                                                                                                                                                                                                                                                                   |                                                        |         |
|                                                                                            |                  |                                                               | Second-generation Eastern Europe and Central Asia compared with children of nonimmigrants | 2144660 IBD          | Birth                 | 0.6 <sup>†</sup>   | 0.36-0.99          |                                                                                                                                                                                                                                                                                                   |                                                        |         |
|                                                                                            |                  |                                                               | 2144660 CD                                                                                | Birth                | 0.34 <sup>†</sup>     | 0.14-0.82          |                    |                                                                                                                                                                                                                                                                                                   |                                                        |         |
|                                                                                            |                  |                                                               | 2144660 UC                                                                                | Birth                | 0.66 <sup>†</sup>     | 0.30-1.49          |                    |                                                                                                                                                                                                                                                                                                   |                                                        |         |
|                                                                                            |                  |                                                               | Second-generation Latin America and Caribbean compared with children of nonimmigrants     | 2144660 IBD          | Birth                 | 0.66 <sup>†</sup>  | 0.45-0.98          |                                                                                                                                                                                                                                                                                                   |                                                        |         |
|                                                                                            |                  |                                                               | 2144660 CD                                                                                | Birth                | 0.48 <sup>†</sup>     | 0.27-0.88          |                    |                                                                                                                                                                                                                                                                                                   |                                                        |         |
|                                                                                            |                  |                                                               | 2144660 UC                                                                                | Birth                | 0.71 <sup>†</sup>     | 0.38-1.33          |                    |                                                                                                                                                                                                                                                                                                   |                                                        |         |
|                                                                                            |                  |                                                               | Second-generation Middle East and North Africa compared with children of nonimmigrants    | 2144660 IBD          | Birth                 | 0.61 <sup>†</sup>  | 0.27-1.35          |                                                                                                                                                                                                                                                                                                   |                                                        |         |
|                                                                                            |                  |                                                               | 2144660 CD                                                                                | Birth                | 0.63 <sup>†</sup>     | 0.27-1.35          |                    |                                                                                                                                                                                                                                                                                                   |                                                        |         |
|                                                                                            |                  |                                                               | 2144660 UC                                                                                | Birth                | 1.63 <sup>†</sup>     | 0.87-3.05          |                    |                                                                                                                                                                                                                                                                                                   |                                                        |         |
| Second-generation South Asia compared with children of nonimmigrants                       | 2144660 IBD      | Birth                                                         | 0.83 <sup>†</sup>                                                                         | 0.63-1.09            |                       |                    |                    |                                                                                                                                                                                                                                                                                                   |                                                        |         |
| 2144660 CD                                                                                 | Birth            | 0.57 <sup>†</sup>                                             | 0.37-0.89                                                                                 |                      |                       |                    |                    |                                                                                                                                                                                                                                                                                                   |                                                        |         |
| 2144660 UC                                                                                 | Birth            | 1.11 <sup>†</sup>                                             | 0.74-1.68                                                                                 |                      |                       |                    |                    |                                                                                                                                                                                                                                                                                                   |                                                        |         |
| Second-generation Sub-Saharan Africa compared with children of nonimmigrants               | 2144660 IBD      | Birth                                                         | 0.63 <sup>†</sup>                                                                         | 0.37-1.09            |                       |                    |                    |                                                                                                                                                                                                                                                                                                   |                                                        |         |
| 2144660 CD                                                                                 | Birth            | 0.95 <sup>†</sup>                                             | 0.28-1.24                                                                                 |                      |                       |                    |                    |                                                                                                                                                                                                                                                                                                   |                                                        |         |
| 2144660 UC                                                                                 | Birth            | 0.68 <sup>†</sup>                                             | 0.28-1.64                                                                                 |                      |                       |                    |                    |                                                                                                                                                                                                                                                                                                   |                                                        |         |
| Second-generation Western Europe and North America compared with children of nonimmigrants | 2144660 IBD      | Birth                                                         | 1.15 <sup>†</sup>                                                                         | 0.77-1.72            |                       |                    |                    |                                                                                                                                                                                                                                                                                                   |                                                        |         |
| 2144660 CD                                                                                 | Birth            | 1.15 <sup>†</sup>                                             | 0.68-1.96                                                                                 |                      |                       |                    |                    |                                                                                                                                                                                                                                                                                                   |                                                        |         |
| 2144660 UC                                                                                 | Birth            | 1.2 <sup>†</sup>                                              | 0.62-2.32                                                                                 |                      |                       |                    |                    |                                                                                                                                                                                                                                                                                                   |                                                        |         |
| Montgomery, S.M. et al. 1999                                                               | United Kingdom   | April 5-11, 1970                                              | Second-generation Indian/Pakistani/Bangladeshi                                            | 8432 IBD             | Birth                 | 7.02 <sup>††</sup> | 2.39-20.65         | Adjusted for sex and household crowding                                                                                                                                                                                                                                                           |                                                        |         |
|                                                                                            |                  |                                                               | Second-generation West Indian/Guyanese                                                    | 8432 IBD             | Birth                 | 3.47 <sup>††</sup> | 0.47-25.87         |                                                                                                                                                                                                                                                                                                   |                                                        |         |
| Li, X. et al. 2011                                                                         | Sweden           | 1986-2007                                                     | All second-generation immigrants                                                          | UC                   | Birth                 | 0.98 <sup>†</sup>  | 0.94-1.02          | Adjusted for age (in 5- year groups), gender, time period, socio-economic status, and geographical region-specific                                                                                                                                                                                |                                                        |         |
|                                                                                            |                  |                                                               | UC                                                                                        | Birth                | 0.98 <sup>†</sup>     | 0.94-1.03          |                    |                                                                                                                                                                                                                                                                                                   |                                                        |         |
|                                                                                            |                  |                                                               | Second-generation from Denmark                                                            | UC                   | Birth                 | 1.17 <sup>†</sup>  | 1.03-1.35          |                                                                                                                                                                                                                                                                                                   |                                                        |         |
|                                                                                            |                  |                                                               | UC                                                                                        | Birth                | 1.02 <sup>†</sup>     | 0.95-1.24          |                    |                                                                                                                                                                                                                                                                                                   |                                                        |         |
|                                                                                            |                  |                                                               | Second-generation from Finland                                                            | UC                   | Birth                 | 0.83 <sup>†</sup>  | 0.77-0.90          |                                                                                                                                                                                                                                                                                                   |                                                        |         |
|                                                                                            |                  |                                                               | UC                                                                                        | Birth                | 1.07 <sup>†</sup>     | 1.00-1.14          |                    |                                                                                                                                                                                                                                                                                                   |                                                        |         |
|                                                                                            |                  |                                                               | Second-generation from Norway                                                             | UC                   | Birth                 | 1.13 <sup>†</sup>  | 0.99-1.29          |                                                                                                                                                                                                                                                                                                   |                                                        |         |
|                                                                                            |                  |                                                               | UC                                                                                        | Birth                | 0.93 <sup>†</sup>     | 0.81-1.06          |                    |                                                                                                                                                                                                                                                                                                   |                                                        |         |
|                                                                                            |                  |                                                               | Second-generation from Greece                                                             | UC                   | Birth                 | 0.99 <sup>†</sup>  | 0.67-1.42          |                                                                                                                                                                                                                                                                                                   |                                                        |         |
|                                                                                            |                  |                                                               | UC                                                                                        | Birth                | 0.95 <sup>†</sup>     | 0.34-0.88          |                    |                                                                                                                                                                                                                                                                                                   |                                                        |         |
|                                                                                            |                  |                                                               | Second-generation from Italy                                                              | UC                   | Birth                 | 1.30 <sup>†</sup>  | 0.87-1.85          |                                                                                                                                                                                                                                                                                                   |                                                        |         |
|                                                                                            |                  |                                                               | UC                                                                                        | Birth                | 0.81 <sup>†</sup>     | 0.51-1.23          |                    |                                                                                                                                                                                                                                                                                                   |                                                        |         |
|                                                                                            |                  |                                                               | Second-generation from Spain                                                              | UC                   | Birth                 | 0.85 <sup>†</sup>  | 0.45-1.46          |                                                                                                                                                                                                                                                                                                   |                                                        |         |
|                                                                                            |                  |                                                               | UC                                                                                        | Birth                | 0.66 <sup>†</sup>     | 0.33-1.18          |                    |                                                                                                                                                                                                                                                                                                   |                                                        |         |
|                                                                                            |                  |                                                               | Second-generation from Great Britain and Ireland                                          | UC                   | Birth                 | 1.07 <sup>†</sup>  | 0.67-1.44          |                                                                                                                                                                                                                                                                                                   |                                                        |         |
|                                                                                            |                  |                                                               | UC                                                                                        | Birth                | 0.66 <sup>†</sup>     | 0.41-1.00          |                    |                                                                                                                                                                                                                                                                                                   |                                                        |         |
|                                                                                            |                  |                                                               | Second-generation from Germany                                                            | UC                   | Birth                 | 1.17 <sup>†</sup>  | 0.96-1.30          |                                                                                                                                                                                                                                                                                                   |                                                        |         |
|                                                                                            |                  |                                                               | UC                                                                                        | Birth                | 0.92 <sup>†</sup>     | 0.85-1.15          |                    |                                                                                                                                                                                                                                                                                                   |                                                        |         |
|                                                                                            |                  |                                                               | Second-generation from Austria                                                            | UC                   | Birth                 | 1.20 <sup>†</sup>  | 0.81-1.72          |                                                                                                                                                                                                                                                                                                   |                                                        |         |
|                                                                                            |                  |                                                               | UC                                                                                        | Birth                | 1.14 <sup>†</sup>     | 0.79-1.59          |                    |                                                                                                                                                                                                                                                                                                   |                                                        |         |
|                                                                                            |                  |                                                               | Second-generation from Yugoslavia                                                         | UC                   | Birth                 | 1.19 <sup>†</sup>  | 0.97-1.44          |                                                                                                                                                                                                                                                                                                   |                                                        |         |
|                                                                                            |                  |                                                               | UC                                                                                        | Birth                | 0.60 <sup>†</sup>     | 0.46-0.76          |                    |                                                                                                                                                                                                                                                                                                   |                                                        |         |
|                                                                                            |                  |                                                               | Second-generation from Romania                                                            | UC                   | Birth                 | 1.39 <sup>†</sup>  | 0.76-2.34          |                                                                                                                                                                                                                                                                                                   |                                                        |         |
|                                                                                            |                  |                                                               | UC                                                                                        | Birth                | 0.65 <sup>†</sup>     | 0.26-1.35          |                    |                                                                                                                                                                                                                                                                                                   |                                                        |         |
|                                                                                            |                  |                                                               | Second-generation from Estonia                                                            | UC                   | Birth                 | 0.85 <sup>†</sup>  | 0.62-1.13          |                                                                                                                                                                                                                                                                                                   |                                                        |         |
|                                                                                            |                  |                                                               | UC                                                                                        | Birth                | 1.02 <sup>†</sup>     | 0.85-1.38          |                    |                                                                                                                                                                                                                                                                                                   |                                                        |         |
|                                                                                            |                  |                                                               | Second-generation from Poland                                                             | UC                   | Birth                 | 1.02 <sup>†</sup>  | 0.77-1.32          |                                                                                                                                                                                                                                                                                                   |                                                        |         |
| UC                                                                                         | Birth            | 0.96 <sup>†</sup>                                             | 0.74-1.24                                                                                 |                      |                       |                    |                    |                                                                                                                                                                                                                                                                                                   |                                                        |         |
| Second-generation from Hungary                                                             | UC               | Birth                                                         | 1.26 <sup>†</sup>                                                                         | 0.92-1.69            |                       |                    |                    |                                                                                                                                                                                                                                                                                                   |                                                        |         |
| UC                                                                                         | Birth            | 0.87 <sup>†</sup>                                             | 0.61-1.20                                                                                 |                      |                       |                    |                    |                                                                                                                                                                                                                                                                                                   |                                                        |         |
| Second-generation from Chile                                                               | UC               | Birth                                                         | 0.49 <sup>†</sup>                                                                         | 0.28-0.80            |                       |                    |                    |                                                                                                                                                                                                                                                                                                   |                                                        |         |
| UC                                                                                         | Birth            | 0.91 <sup>†</sup>                                             | 0.62-1.31                                                                                 |                      |                       |                    |                    |                                                                                                                                                                                                                                                                                                   |                                                        |         |
| Second-generation from Turkey                                                              | UC               | Birth                                                         | 0.82 <sup>†</sup>                                                                         | 0.68-1.15            |                       |                    |                    |                                                                                                                                                                                                                                                                                                   |                                                        |         |
| UC                                                                                         | Birth            | 0.86 <sup>†</sup>                                             | 0.65-1.12                                                                                 |                      |                       |                    |                    |                                                                                                                                                                                                                                                                                                   |                                                        |         |
| Second-generation from Lebanon                                                             | UC               | Birth                                                         | 1.30 <sup>†</sup>                                                                         | 0.80-1.73            |                       |                    |                    |                                                                                                                                                                                                                                                                                                   |                                                        |         |
| UC                                                                                         | Birth            | 1.02 <sup>†</sup>                                             | 0.60-1.64                                                                                 |                      |                       |                    |                    |                                                                                                                                                                                                                                                                                                   |                                                        |         |
| Second-generation from Iran                                                                | UC               | Birth                                                         | 1.16 <sup>†</sup>                                                                         | 0.87-1.50            |                       |                    |                    |                                                                                                                                                                                                                                                                                                   |                                                        |         |
| UC                                                                                         | Birth            | 1.55 <sup>†</sup>                                             | 1.14-2.06                                                                                 |                      |                       |                    |                    |                                                                                                                                                                                                                                                                                                   |                                                        |         |
| Second-generation from Iraq                                                                | UC               | Birth                                                         | 1.85 <sup>†</sup>                                                                         | 1.28-2.59            |                       |                    |                    |                                                                                                                                                                                                                                                                                                   |                                                        |         |
| UC                                                                                         | Birth            | 1.19 <sup>†</sup>                                             | 0.72-1.83                                                                                 |                      |                       |                    |                    |                                                                                                                                                                                                                                                                                                   |                                                        |         |
| Case-Control Studies                                                                       |                  |                                                               |                                                                                           |                      |                       |                    |                    |                                                                                                                                                                                                                                                                                                   |                                                        |         |
| Bernstein, C.N. et al. 2006                                                                | Manitoba, Canada | Not Reported                                                  | First generation Canadian (born in Canada), compared with controls                        | 797 CD               | Birth                 | 0.33 <sup>†</sup>  | 0.17-0.62          | Adjusted for age and gender                                                                                                                                                                                                                                                                       |                                                        |         |
|                                                                                            |                  |                                                               | First generation Canadian (born in Canada), compared with UC                              | 797 CD               | Birth                 | 0.5 <sup>†</sup>   | 0.31-0.83          |                                                                                                                                                                                                                                                                                                   |                                                        |         |
| van der Sloot, K. et al. 2020                                                              | Netherlands      | Not Reported                                                  | Non-Western Migration (2nd generation)                                                    | 1671 CD              | 0-5 yrs               | 1.2 <sup>†</sup>   | 0.38-3.78          | Adjusted for gender, age, and smoking status at diagnosis (never/former/current)                                                                                                                                                                                                                  |                                                        |         |
|                                                                                            |                  |                                                               |                                                                                           | 1669 UC              | 0-5 yrs               | 1.42 <sup>††</sup> | 0.46-4.38          |                                                                                                                                                                                                                                                                                                   |                                                        |         |

| Study tupe                  | Study                        | Study Location              | Study Time Period | Exposure Description                                 | Total sample size (n) | Outcome | Period of exposure           | Effect estimate value | Confidence interval (specify if different from 95% CI) | Comments                                                                                                                                                               |
|-----------------------------|------------------------------|-----------------------------|-------------------|------------------------------------------------------|-----------------------|---------|------------------------------|-----------------------|--------------------------------------------------------|------------------------------------------------------------------------------------------------------------------------------------------------------------------------|
| <b>Cohort Studies</b>       |                              |                             |                   |                                                      |                       |         |                              |                       |                                                        |                                                                                                                                                                        |
|                             | Lange, A. et al. 2014        | Denmark                     | 1995-2009         | Antibiotics or infections requiring hospitalization  | 979039                | CD      | Infancy                      | 1.4 <sup>††</sup>     | 1-1.8                                                  | Adjusted for family history of CD, mode of delivery, birth order, year of birth, gestational age, rural vs urban residence, maternal smoking, and NSAID use in infancy |
| <b>Case-Control Studies</b> |                              |                             |                   |                                                      |                       |         |                              |                       |                                                        |                                                                                                                                                                        |
|                             | Amre, D.K. et al. 2006       | Montreal, Canada            | 1995-2004         | Physician-diagnosed childhood infections             | 388                   | CD      | 0-5 yrs                      | 0.9 <sup>**</sup>     | 0.6, 1.5                                               | Adjusted for age, gender, family history of IBD, maternal smoking, and maternal education                                                                              |
|                             | Axelrad J.E. et al. 2019     | Sweden                      | 2002-2014         | Gastroenteritis                                      | 480721                | IBD     | 0-5 yrs                      | 1.09 <sup>**</sup>    | 1.01–1.16                                              | Adjusted for sex, age, birth year, place of residence, and previous gastrointestinal surgery, autoimmune disease, and family history of IBD                            |
|                             | Bernstein, C.N. et al. 2019  | Manitoba, Canada            | 1970-2010         | Infections                                           | 12159                 | IBD     | Infancy                      | 1.39 <sup>*</sup>     | 1.09-1.79                                              | Unadjusted estimates reported                                                                                                                                          |
|                             | Ekblom, A. et al. 1990       | Sweden                      | 1924-1957         | Postnatal infection                                  | 771                   | IBD     | Perinatal                    | 5.5 <sup>¶</sup>      | 2.6-11.8                                               | Unadjusted estimates reported                                                                                                                                          |
|                             | Hildebrand, H. et al. 2008   | Sweden                      | 1973-1997         | Otitis media                                         | 7648                  | CD      | 0-5 yrs                      | 1.61 <sup>**</sup>    | 0.89-2.92                                              | Adjusted for maternal age                                                                                                                                              |
|                             |                              |                             |                   | Pneumonia                                            | 7648                  | CD      | 0-5 yrs                      | 3.56 <sup>**</sup>    | 1.79-7.08                                              |                                                                                                                                                                        |
|                             | Shaw, S.Y. et al. 2013       | Canada                      | 1989-2008         | Otitis media                                         | 2671                  | IBD     | 0-5 yrs                      | 2.8 <sup>**</sup>     | 1.5-5.23                                               | Adjusted for cumulative number of non–gastrointestinal-related physician v                                                                                             |
|                             |                              |                             |                   |                                                      | 2671                  | CD      | 0-5 yrs                      | 2.69 <sup>**</sup>    | 1.23-5.9                                               |                                                                                                                                                                        |
|                             |                              |                             |                   |                                                      | 2671                  | UC      | 0-5 yrs                      | 3.02 <sup>**</sup>    | 1.07-8.5                                               |                                                                                                                                                                        |
|                             | Springmann, V. et al. 2014   | Quebec, Canada              | 1988-2005         | Infection                                            | 2030                  | CD      | 0-5 yrs                      | 0.98 <sup>**</sup>    | 0.77-1.24                                              | Adjusted for age, gender, and area of residence                                                                                                                        |
|                             |                              |                             |                   | Infection                                            | 2030                  | CD      | Infancy                      | 0.98 <sup>**</sup>    | 0.74-1.3                                               |                                                                                                                                                                        |
|                             | Strisciuglio, C. et al. 2017 | Italy                       | 2000-2014         | Infections or hospitalizations                       | 467                   | IBD     | Infancy                      | Not Reported          |                                                        |                                                                                                                                                                        |
|                             |                              |                             |                   | Infections such as measles, mumps, smallpox, rubella | 467                   | IBD     | 0-5 yrs                      | Not Reported          |                                                        |                                                                                                                                                                        |
|                             | Thompson, N.P. et al. 1995   | United Kingdom              | 1950-1968         | Exposure to measles                                  | 2244                  | CD      | Pregnancy (first trimester)  | 1,11                  | 0.93-1.32 <sup>*</sup>                                 | Unadjusted estimates reported                                                                                                                                          |
|                             |                              |                             |                   |                                                      | 2244                  | CD      | Pregnancy (second trimester) | 0,93                  | 0.79-1.11 <sup>*</sup>                                 |                                                                                                                                                                        |
|                             |                              |                             |                   |                                                      | 2244                  | CD      | Pregnancy (third trimester)  | 0,95                  | 0.8-1.13 <sup>*</sup>                                  |                                                                                                                                                                        |
|                             |                              |                             |                   |                                                      | 2244                  | CD      | At birth                     | 0,88                  | 0.74-1.06 <sup>*</sup>                                 |                                                                                                                                                                        |
|                             |                              |                             |                   |                                                      | 2244                  | CD      | 0-6 months                   | 0,9                   | 0.76-1.07 <sup>*</sup>                                 |                                                                                                                                                                        |
|                             |                              |                             |                   |                                                      | 2244                  | CD      | Infancy                      | 0,96                  | 0.78-1.18 <sup>*</sup>                                 |                                                                                                                                                                        |
|                             | Whorwell, P. J. et al. 1979  | Southampton, United Kingdom | Not Reported      | Gastroenteritis                                      | 228                   | CD      | Infancy                      | Not Reported          |                                                        |                                                                                                                                                                        |
|                             |                              |                             |                   |                                                      | 204                   | UC      | Infancy                      | Not Reported          |                                                        |                                                                                                                                                                        |

| Study design                             | Study                     | Study location           | Study Time Period                          | Exposure Description                                | Total sample size (n) | Outcome  | Period of exposure | Effect estimate value | Confidence interval (specify if different from 95% CI)                                                                                                                                                                                                                                    | Comments                                                                                                                                                               |
|------------------------------------------|---------------------------|--------------------------|--------------------------------------------|-----------------------------------------------------|-----------------------|----------|--------------------|-----------------------|-------------------------------------------------------------------------------------------------------------------------------------------------------------------------------------------------------------------------------------------------------------------------------------------|------------------------------------------------------------------------------------------------------------------------------------------------------------------------|
| <b>Cohort Studies</b>                    |                           |                          |                                            |                                                     |                       |          |                    |                       |                                                                                                                                                                                                                                                                                           |                                                                                                                                                                        |
|                                          | Nylund, C. et al. 2019    | United States of America | Not Reported                               | Antibiotics                                         | 968468                | CD       | 0-6 mos            | 1.34††                | 1.11-1.62                                                                                                                                                                                                                                                                                 | Adjusting variables not reported                                                                                                                                       |
|                                          |                           |                          |                                            |                                                     | 968468                | UC       |                    | 1.10††                | 0.84-1.44                                                                                                                                                                                                                                                                                 |                                                                                                                                                                        |
|                                          |                           |                          |                                            | Proton pump inhibitors                              | 968468                | CD       |                    | 1.45††                | 0.86-2.42                                                                                                                                                                                                                                                                                 |                                                                                                                                                                        |
|                                          |                           |                          |                                            |                                                     | 968468                | UC       |                    | 3.76††                | 2.28-6.17                                                                                                                                                                                                                                                                                 |                                                                                                                                                                        |
|                                          |                           |                          |                                            | H2 receptor antagonists                             | 968468                | CD       |                    | 1.34††                | 1.01-1.80                                                                                                                                                                                                                                                                                 |                                                                                                                                                                        |
|                                          |                           |                          |                                            |                                                     | 968468                | UC       |                    | 1.23††                | 0.83-1.83                                                                                                                                                                                                                                                                                 |                                                                                                                                                                        |
|                                          | Lange, A. et al. 2014     | Denmark                  | 1991-2000; 2001-2010                       | Antibiotics or infections requiring hospitalization | 979 039               | CD       | Infancy            | 1.4††                 | 1-1.8                                                                                                                                                                                                                                                                                     | Adjusted for family history of CD, mode of delivery, birth order, year of birth, gestational age, rural vs urban residence, maternal smoking, and NSAID use in infancy |
|                                          | Kronman, M.P. et al. 2012 | United Kingdom           | 1994-2009                                  | Antibiotics at ≤1 year of age                       | 1072426               | IBD      | Infancy            | 5.51††                | 1.66-18.28                                                                                                                                                                                                                                                                                | Adjusted for family history of IBD, gender, chronic granulomatous disease, primary sclerosing cholangitis, and socioeconomic deprivation                               |
|                                          |                           |                          |                                            | 1-2 courses of anaerobic antibiotics                | 1072426               | IBD      | Infancy            | 3.33††                | 1.69-6.58                                                                                                                                                                                                                                                                                 |                                                                                                                                                                        |
|                                          |                           |                          |                                            | >2 anaerobic antibiotics                            | 1072426               | IBD      | Infancy            | 4.77††                | 2.13-10.68                                                                                                                                                                                                                                                                                |                                                                                                                                                                        |
| Ortqvist, A.K. et al. 2017               | Sweden                    | 2006-2013                | Antibiotics                                | 827239                                              | IBD                   | Infancy  | 1.11††             | 0.57-2.15             | Adjusted for mother's and father's history of IBD, parental education, mother's and father's country of birth and mode of delivery                                                                                                                                                        |                                                                                                                                                                        |
|                                          |                           |                          |                                            | 827239                                              | CD                    | Infancy  | 0.72††             | 0.27-1.92             |                                                                                                                                                                                                                                                                                           |                                                                                                                                                                        |
|                                          |                           |                          |                                            | 827239                                              | UC                    | Infancy  | 1.23††             | 0.45-3.39             |                                                                                                                                                                                                                                                                                           |                                                                                                                                                                        |
| <b>Case-Control studies</b>              |                           |                          |                                            |                                                     |                       |          |                    |                       |                                                                                                                                                                                                                                                                                           |                                                                                                                                                                        |
| Shaw S.Y. et al. 2010                    | Canada                    | 1996-1997, 2007-2008     | Antibiotics                                | 396                                                 | IBD                   | Infancy  | 2.9*               | 1.21-6.96             | Unadjusted estimates reported                                                                                                                                                                                                                                                             |                                                                                                                                                                        |
| Hviid, A. et al. 2010                    | Denmark                   | 1995-2003                | Antibiotics use in the previous 3 months   | 577627                                              | CD                    | 0-2 mos  | NA                 | 1.08-3.15             | Adjusted for age (in 1-year intervals) and calendar period (in 1-year intervals)                                                                                                                                                                                                          |                                                                                                                                                                        |
|                                          |                           |                          |                                            | 577627                                              | CD                    | 3-11 mos | 3.32**             | 1.15-9.56             |                                                                                                                                                                                                                                                                                           |                                                                                                                                                                        |
|                                          |                           |                          |                                            | 577627                                              | CD                    | Infancy  | 1.53**             | 0.15-15.46            |                                                                                                                                                                                                                                                                                           |                                                                                                                                                                        |
|                                          |                           |                          | 577627                                     | CD                                                  | 2-3 yrs               | 3.73**   | 1.02-13.60         |                       |                                                                                                                                                                                                                                                                                           |                                                                                                                                                                        |
|                                          |                           |                          | Antibiotic use >3 months previously        | 577627                                              | CD                    | 0-2 mos  | 4.19**             | 1.64-10.68            |                                                                                                                                                                                                                                                                                           |                                                                                                                                                                        |
|                                          |                           |                          |                                            | 577627                                              | CD                    | 3-11 mos | 1.04**             | 0.53-2.04             |                                                                                                                                                                                                                                                                                           |                                                                                                                                                                        |
|                                          |                           |                          |                                            | 577627                                              | CD                    | Infancy  | 1.11**             | 0.52-2.35             |                                                                                                                                                                                                                                                                                           |                                                                                                                                                                        |
| 577627                                   | CD                        | 2-3 yrs                  |                                            | 2.17**                                              |                       |          |                    |                       |                                                                                                                                                                                                                                                                                           |                                                                                                                                                                        |
| Han, D.Y. et al. 2010                    | New Zealand               | Not Reported             | Any regular medication                     | 851                                                 | CD                    | < 6 yrs  | 1.36*              | 0.65-2.83             | Unadjusted estimates reported                                                                                                                                                                                                                                                             |                                                                                                                                                                        |
|                                          |                           |                          | ≥4 antibiotics/year                        | 851                                                 | CD                    | < 6 yrs  | 2.19*              | 1.41-3.40             |                                                                                                                                                                                                                                                                                           |                                                                                                                                                                        |
| Troelsen, F. et al. 2020                 | United Kingdom            | 1998-2017                | Antibiotics (ever vs never users)          | 5720                                                | CD                    | 0-5 yrs  | 2.2**              | 0.75-6.43             | Adjusted for age (+/- 2 years), sex, general practice, and registration year in the registry                                                                                                                                                                                              |                                                                                                                                                                        |
|                                          |                           |                          |                                            | 5720                                                | UC                    | 0-5 yrs  | 1.07**             | 0.41-2.79             |                                                                                                                                                                                                                                                                                           |                                                                                                                                                                        |
|                                          |                           |                          | Antibiotics (1 prescription vs. none)      | 5720                                                | CD                    | 0-5 yrs  | 2.92**             | 0.85-10               |                                                                                                                                                                                                                                                                                           |                                                                                                                                                                        |
|                                          |                           |                          |                                            | 5720                                                | UC                    | 0-5 yrs  | 1**                | 0.28-3.52             |                                                                                                                                                                                                                                                                                           |                                                                                                                                                                        |
|                                          |                           |                          | Antibiotics (2-4 prescriptions vs. none)   | 5720                                                | CD                    | 0-5 yrs  | 2.37**             | 0.77-7.11             |                                                                                                                                                                                                                                                                                           |                                                                                                                                                                        |
|                                          |                           |                          |                                            | 5720                                                | UC                    | 0-5 yrs  | 1.01**             | 0.36-2.84             |                                                                                                                                                                                                                                                                                           |                                                                                                                                                                        |
|                                          |                           |                          | Antibiotics (5-9 prescriptions vs. none)   | 5720                                                | CD                    | 0-5 yrs  | 2.39**             | 0.79-2.27             |                                                                                                                                                                                                                                                                                           |                                                                                                                                                                        |
|                                          |                           |                          |                                            | 5720                                                | UC                    | 0-5 yrs  | 1.05**             | 0.39-2.91             |                                                                                                                                                                                                                                                                                           |                                                                                                                                                                        |
|                                          |                           |                          | Antibiotics (10-19 prescriptions vs. none) | 5720                                                | CD                    | 0-5 yrs  | 1.97**             | 0.63-6.12             |                                                                                                                                                                                                                                                                                           |                                                                                                                                                                        |
|                                          |                           |                          |                                            | 5720                                                | UC                    | 0-5 yrs  | 1.06**             | 0.36-3.08             |                                                                                                                                                                                                                                                                                           |                                                                                                                                                                        |
| Antibiotics (≥20 prescriptions vs. none) | 5720                      | CD                       | 0-5 yrs                                    | 0.54**                                              | 0.90-3.25             |          |                    |                       |                                                                                                                                                                                                                                                                                           |                                                                                                                                                                        |
|                                          | 5720                      | UC                       | 0-5 yrs                                    | 1.75**                                              | 0.47-6.50             |          |                    |                       |                                                                                                                                                                                                                                                                                           |                                                                                                                                                                        |
| Canova, C. et al. 2020                   | Italy                     | 1989-2012                | Antibiotics                                | 1804                                                | IBD                   | 0-6 mos  | 1.45**             | 0.80-2.62             | Adjusted for sex; year of birth; season of birth; having older siblings; number of births; birth weight; gestational age; Apgar scores at 1 minute; maternal age; mother's formal education at the moment of birth and gastrointestinal infections (hospital discharge record diagnosis). |                                                                                                                                                                        |
|                                          |                           |                          |                                            | 1804                                                | CD                    | 0-6 mos  | 2.61**             | 1.17-5.81             |                                                                                                                                                                                                                                                                                           |                                                                                                                                                                        |
|                                          |                           |                          |                                            | 1804                                                | UC                    | 0-6 mos  | 0.85**             | 0.29-2.52             |                                                                                                                                                                                                                                                                                           |                                                                                                                                                                        |
|                                          |                           |                          |                                            | 1804                                                | IBD                   | Infancy  | 1.07**             | 0.64-1.79             |                                                                                                                                                                                                                                                                                           |                                                                                                                                                                        |
|                                          |                           |                          |                                            | 1804                                                | CD                    | Infancy  | 1.72**             | 0.84-3.53             |                                                                                                                                                                                                                                                                                           |                                                                                                                                                                        |
|                                          |                           |                          |                                            | 1804                                                | UC                    | Infancy  | 0.72**             | 0.28-1.86             |                                                                                                                                                                                                                                                                                           |                                                                                                                                                                        |
| Gearry, R.B. et al. 2010                 | New Zealand               | 2003-2005                | antibiotic use >4 times/year               | 1238                                                | CD                    | Infancy  | 1.21**             | 0.78-1.58             | Adjusting variables not reported                                                                                                                                                                                                                                                          |                                                                                                                                                                        |
|                                          |                           |                          |                                            | 1253                                                | UC                    | Infancy  | 0.94**             | 0.58-1.51             |                                                                                                                                                                                                                                                                                           |                                                                                                                                                                        |

| Study design                | Study                      | Study Location             | Study Time Period | Exposure Description | Total sample size (n) | Outcome | Period of exposure | Effect estimate value | Confidence interval (specify if different from 95% CI) | Comments                                                                                                                                                                                        |
|-----------------------------|----------------------------|----------------------------|-------------------|----------------------|-----------------------|---------|--------------------|-----------------------|--------------------------------------------------------|-------------------------------------------------------------------------------------------------------------------------------------------------------------------------------------------------|
| <b>Case Control Studies</b> |                            |                            |                   |                      |                       |         |                    |                       |                                                        |                                                                                                                                                                                                 |
|                             | Thompson, N.P. et al. 1995 | England                    | 1950-1968         | Passive smoking      | 3073                  | CD      | 0-5 yrs            | 1.04*                 | 0.88-1.23                                              | Unadjusted estimates reported. Note: total number of CD patients with controls.                                                                                                                 |
|                             |                            |                            |                   |                      | 1654                  | UC      | 0-5 yrs            | 1.1                   | 0.90-1.50                                              |                                                                                                                                                                                                 |
|                             | Han, D.Y. et al. 2010      | New Zealand                | Not Reported      | Smoking Exposure     | 851                   | CD      | 0-5 yrs            | 1.19                  | 0.89-1.59                                              | Unadjusted estimates reported. There was no significant association with smokers at home during the adolescence, childhood, or preschool period ( $p > 0.05$ ). Represented OR children < 6 yrs |
|                             | Basson, A. et al. 2014     | Western Cape, South Africa | September 20      | Passive smoking      | 407                   | IBD     | 0-5 yrs            | 1.71**                | 1.01-2.94                                              | Adjusted for age at study enrolment, gender and ethnicity                                                                                                                                       |



| Case-control Studies              |                                               |                                              |                                    |                                     |               |                                       |                                                                                          |                                     |                                                                  |                                |
|-----------------------------------|-----------------------------------------------|----------------------------------------------|------------------------------------|-------------------------------------|---------------|---------------------------------------|------------------------------------------------------------------------------------------|-------------------------------------|------------------------------------------------------------------|--------------------------------|
| Study (name, year)                | Selection                                     |                                              |                                    |                                     | Comparability | Exposure                              |                                                                                          |                                     |                                                                  |                                |
|                                   | 1. Is the case definition adequate? (1 point) | 2. Representativeness of the cases (1 point) | 3. Selection of Controls (1 point) | 4. Definition of Controls (1 point) |               | Total points for selection (4 points) | 1. Comparability of cases and controls on the basis of the design or analysis (2 points) | 1. Assessment of exposure (1 point) | 2. Same method of ascertainment for cases and controls (1 point) | 3. Non-Response rate (1 point) |
| Amre, D.K. et al. 2006            | 1(a)                                          | 1(a)                                         | 0(b)                               | 1(a)                                | 3             | 2                                     | 1(b)                                                                                     | 1(a)                                | 1(a)                                                             | 3                              |
| Ananthkrishnan, A.N. et al. 2015  | 0(c)                                          | 0(b)                                         | 0(c)                               | 0(b)                                | 0             | 1                                     | 0(c)                                                                                     | 1(a)                                | 0(c)                                                             | 1                              |
| Axelrad, J. et al. 2019           | 1(a)                                          | 1(a)                                         | 1(a)                               | 1(a)                                | 4             | 2                                     | 1(a)                                                                                     | 1(a)                                | 0(c)                                                             | 2                              |
| Bager, P. et al. 2012             | 0(b)                                          | 1(a)                                         | 1(a)                               | 1(a)                                | 3             | 2                                     | 0(d)                                                                                     | 1(a)                                | 1(a)                                                             | 3                              |
| Baron, S. et al. 2005             | 1(a)                                          | 1(a)                                         | 1(a)                               | 0(b)                                | 3             | 2                                     | 1(b)                                                                                     | 1(a)                                | 1(a)                                                             | 3                              |
| Basson, A. et al. 2014            | 1(a)                                          | 1(a)                                         | 1(a)                               | 1(a)                                | 4             | 2                                     | 0(c)                                                                                     | 1(a)                                | 1(a)                                                             | 2                              |
| Bergstrand, O. et al. 1983        | 1(a)                                          | 0(b)                                         | 1(a)                               | 0(b)                                | 2             | 2                                     | 0(c)                                                                                     | 1(a)                                | 0(c)                                                             | 1                              |
| Bernstein, C.N. et al. 2006       | 1(a)                                          | 1(a)                                         | 1(a)                               | 0(b)                                | 3             | 2                                     | 0(c)                                                                                     | 1(a)                                | 0(c)                                                             | 1                              |
| Bernstein, C.N. et al. 2016       | 1(a)                                          | 1(a)                                         | 1(a)                               | 1(a)                                | 4             | 1                                     | 1(a)                                                                                     | 1(a)                                | 0(c)                                                             | 2                              |
| Bernstein, C.N. et al. 2017       | 1(a)                                          | 1(a)                                         | 1(a)                               | 1(a)                                | 4             | 2                                     | 1(a)                                                                                     | 1(a)                                | 1(a)                                                             | 3                              |
| Bernstein, C.N. et al. 2019       | 1(a)                                          | 1(a)                                         | 0(c)                               | 1(a)                                | 3             | 2                                     | 1(a)                                                                                     | 1(a)                                | 1(a)                                                             | 3                              |
| Boneberger, A. et al. 2011        | 1(a)                                          | 1(a)                                         | 0(b)                               | 1(a)                                | 3             | 2                                     | 0(c)                                                                                     | 1(a)                                | 0(b)                                                             | 1                              |
| Canova, C. et al. 2020            | 0(b)                                          | 1(a)                                         | 1(a)                               | 1(a)                                | 3             | 2                                     | 1(a)                                                                                     | 1(a)                                | 1(a)                                                             | 3                              |
| Corrao, G. et al. 1998            | 1(a)                                          | 1(a)                                         | 1(a)                               | 1(a)                                | 4             | 1                                     | 1(b)                                                                                     | 1(a)                                | 1(a)                                                             | 3                              |
| Davis, R.L. et al. 2001           | 0(b)                                          | 0(b)                                         | 0(c)                               | 1(a)                                | 1             | 1                                     | 1(a)                                                                                     | 1(a)                                | 1(a)                                                             | 3                              |
| Decker, E. et al. 2010            | 0(b)                                          | 0(b)                                         | 0(b)                               | 0(b)                                | 0             | 2                                     | 0(c)                                                                                     | 1(a)                                | 0(c)                                                             | 1                              |
| Disanto G. et al. 2012            | 0(c)                                          | 0(b)                                         | 1(a)                               | 1(a)                                | 2             | 1                                     | 1(a)                                                                                     | 1(a)                                | 0(c)                                                             | 2                              |
| Doyle, J.B. et al. 2017           | 1(a)                                          | 0(b)                                         | 1(a)                               | 1(a)                                | 3             | 0                                     | 1(a)                                                                                     | 1(a)                                | 1(a)                                                             | 3                              |
| Ekbom, A. et al. 1990             | 1(a)                                          | 1(a)                                         | 0(b)                               | 0(b)                                | 2             | 2                                     | 1(a)                                                                                     | 1(a)                                | 1(a)                                                             | 3                              |
| Eslahpazir J. et al. 2017         | 1(a)                                          | 0(b)                                         | 1(a)                               | 1(a)                                | 4             | 1                                     | 1(b)                                                                                     | 1(a)                                | 0(c)                                                             | 2                              |
| Feeney, M. et al. 1997            | 1(a)                                          | 1(a)                                         | 1(a)                               | 0(b)                                | 3             | 2                                     | 0(d)                                                                                     | 1(a)                                | 0(c)                                                             | 1                              |
| Feeney, M. et al. 2002            | 1(a)                                          | 1(a)                                         | 0(b)                               | 1(a)                                | 3             | 0                                     | 0(c)                                                                                     | 1(a)                                | 0(c)                                                             | 1                              |
| Gearry, R.B. et al. 2010          | 1(a)                                          | 1(a)                                         | 1(a)                               | 1(a)                                | 4             | 2                                     | 1(b)                                                                                     | 1(a)                                | 1(a)                                                             | 3                              |
| Gent, A.E. et al. 1994            | 1(a)                                          | 0(b)                                         | 0(b)                               | 1(a)                                | 2             | 0                                     | 0(c)                                                                                     | 1(a)                                | 1(a)                                                             | 2                              |
| Gilat, T. et al. 1987             | 0(b)                                          | 0(b)                                         | 0(b)                               | 1(a)                                | 1             | 2                                     | 0(c)                                                                                     | 1(a)                                | 0(b)                                                             | 1                              |
| Gruber, M. et al. 1996            | 0(b)                                          | 1(a)                                         | 1(a)                               | 0(b)                                | 2             | 2                                     | 0(d)                                                                                     | 1(a)                                | 0(c)                                                             | 1                              |
| Hampe, J. et al. 2003             | 1(a)                                          | 1(a)                                         | 1(a)                               | 1(a)                                | 4             | 0                                     | 1(b)                                                                                     | 1(a)                                | 0(c)                                                             | 2                              |
| Han, D.Y. et al. 2010             | 1(a)                                          | 1(a)                                         | 1(a)                               | 0(b)                                | 3             | 0                                     | 0(d)                                                                                     | 1(a)                                | 1(a)                                                             | 2                              |
| Hansen, T.S. et al. 2011          | 1(a)                                          | 1(a)                                         | 0(b)                               | 1(a)                                | 3             | 1                                     | 0(d)                                                                                     | 1(a)                                | 1(a)                                                             | 2                              |
| Haslam, N. et al. 2000            | 1(a)                                          | 0(b)                                         | 0(c)                               | 0(b)                                | 1             | 1                                     | 1(a)                                                                                     | 1(a)                                | 0(c)                                                             | 2                              |
| Hildebrand, H. et al. 2008        | 1(a)                                          | 1(a)                                         | 1(a)                               | 1(a)                                | 4             | 2                                     | 1(a)                                                                                     | 1(a)                                | 1(a)                                                             | 3                              |
| Hlavaty, T. et al. 2013           | 1(a)                                          | 1(a)                                         | 1(a)                               | 1(a)                                | 4             | 2                                     | 0(d)                                                                                     | 1(a)                                | 0(c)                                                             | 1                              |
| Holmes, E.A. et al. 2019          | 1(a)                                          | 1(a)                                         | 0(b)                               | 1(a)                                | 3             | 2                                     | 0(d)                                                                                     | 1(a)                                | 1(a)                                                             | 2                              |
| Hutfless, S. et al. 2012          | 1(a)                                          | 0(b)                                         | 1(a)                               | 0(b)                                | 2             | 2                                     | 1(a)                                                                                     | 1(a)                                | 0(c)                                                             | 2                              |
| Hviid, A. et al. 2011             | 1(a)                                          | 1(a)                                         | 1(a)                               | 1(a)                                | 4             | 2                                     | 1(a)                                                                                     | 1(a)                                | 1(a)                                                             | 3                              |
| Jakobsen, C. et al. 2013          |                                               |                                              | 1(a)                               |                                     |               | 2                                     |                                                                                          | 0(d)                                |                                                                  |                                |
| Jiang, L. et al. 2007             | 1(a)                                          | 1(a)                                         | 1(a)                               | 1(a)                                | 4             | 1                                     | 0(c)                                                                                     | 1(a)                                | 1(a)                                                             | 2                              |
| Klein, I. et al. 1993             | 1(a)                                          | 1(a)                                         | 1(a)                               | 0(b)                                | 3             | 0                                     | 0(c)                                                                                     | 1(a)                                | 1(a)                                                             | 2                              |
| Ko, Y. et al. 2015                | 1(a)                                          | 0(b)                                         | 1(a)                               | 1(a)                                | 3             | 1                                     | 0(d)                                                                                     | 1(a)                                | 1(a)                                                             | 2                              |
| Lavy, A. et al. 2001              | 1(a)                                          | 1(a)                                         | 1(a)                               | 1(a)                                | 4             | 1                                     | 0(c)                                                                                     | 1(a)                                | 1(a)                                                             | 3                              |
| Lee, J. et al. 2020               | 0(b)                                          | 1(a)                                         | 0(c)                               | 0(b)                                | 1             | 0                                     | 1(a)                                                                                     | 1(a)                                | 0(c)                                                             | 2                              |
| Levy, L.C. et al. 2012            | 0(c)                                          | 0(b)                                         | 0(c)                               | 0(b)                                | 0             | 2                                     | 0(c)                                                                                     | 0(b)                                | 0(c)                                                             | 0                              |
| Lopez-Serrano, P. et al. 2010     | 1(a)                                          | 1(a)                                         | 0(b)                               | 1(a)                                | 3             | 2                                     | 0(d)                                                                                     | 1(a)                                | 0(c)                                                             | 1                              |
| Mahid, S.S. et al. 2007           | 1(a)                                          | 0(b)                                         | 1(a)                               | 0(b)                                | 2             | 1                                     | 0(e)                                                                                     | 1(a)                                | 1(a)                                                             | 2                              |
| Malekzadeh, F. et al. 2009        | 1(a)                                          | 1(a)                                         | 0(b)                               | 1(a)                                | 3             | 2                                     | 1(b)                                                                                     | 1(a)                                | 0(c)                                                             | 2                              |
| Malmberg, P. et al. 2012          | 1(a)                                          | 1(a)                                         | 1(a)                               | 1(a)                                | 4             | 1                                     | 1(a)                                                                                     | 1(a)                                | 0(c)                                                             | 2                              |
| Ng, S.C. et al. 2015              | 1(a)                                          | 1(a)                                         | 1(a)                               | 1(a)                                | 4             | 2                                     | 0(c)                                                                                     | 1(a)                                | 1(a)                                                             | 2                              |
| Niewiadomski, O. et al. 2016      | 1(a)                                          | 0(b)                                         | 1(a)                               | 1(a)                                | 3             | 0                                     | 0(c)                                                                                     | 1(a)                                | 1(a)                                                             | 2                              |
| Persson, R.G. et al. 1993         | 1(a)                                          | 1(a)                                         | 1(a)                               | 1(a)                                | 4             | 1                                     | 0(d)                                                                                     | 1(a)                                | 1(a)                                                             | 2                              |
| Radon, K. et al. 2007             | 1(a)                                          | 1(a)                                         | 1(a)                               | 1(a)                                | 4             | 1                                     | 0(d)                                                                                     | 1(a)                                | 1(a)                                                             | 2                              |
| Ramakrishna B.S. et al. 2012      | 0(c)                                          | 0(b)                                         | 0(c)                               | 0(b)                                | 0             | 2                                     | 1(b)                                                                                     | 0(b)                                | 0(c)                                                             | 1                              |
| Russel, M.G. et al. 1998          | 1(a)                                          | 1(a)                                         | 1(a)                               | 1(a)                                | 4             | 1                                     | 0(d)                                                                                     | 1(a)                                | 1(a)                                                             | 2                              |
| Russell, R.K. et al. 2005         | 0(c)                                          | 0(b)                                         | 0(c)                               | 0(b)                                | 0             | 0                                     | 0(e)                                                                                     | 0(b)                                | 0(c)                                                             | 0                              |
| Sahu M.K. et al. 2010             | 0(c)                                          | 0(b)                                         | 1(a)                               | 0(b)                                | 1             | 0                                     | 1(b)                                                                                     | 0(b)                                | 0(c)                                                             | 1                              |
| Salgado, V.C. et al. 2017         | 1(a)                                          | 1(a)                                         | 0(b)                               | 1(a)                                | 3             | 2                                     | 0(c)                                                                                     | 1(a)                                | 1(a)                                                             | 2                              |
| Samuelson, S.M. et al. 1991       | 1(a)                                          | 1(a)                                         | 1(a)                               | 0(b)                                | 3             | 0                                     | 0(c)                                                                                     | 1(a)                                | 1(a)                                                             | 2                              |
| Sanagapalli, S. et al. 2015       | 1(a)                                          | 1(a)                                         | 1(a)                               | 1(a)                                | 4             | 0                                     | 0(c)                                                                                     | 1(a)                                | 0(c)                                                             | 1                              |
| Shaw, S.Y. et al. 2010            | 1(a)                                          | 0(b)                                         | 1(a)                               | 1(a)                                | 3             | 2                                     | 1(a)                                                                                     | 1(a)                                | 1(a)                                                             | 3                              |
| Shaw, S.Y. et al. 2013            | 1(a)                                          | 1(a)                                         | 1(a)                               | 1(a)                                | 4             | 2                                     | 0(d)                                                                                     | 1(a)                                | 1(a)                                                             | 3                              |
| Shaw, S.Y. et al. 2014            | 1(a)                                          | 1(a)                                         | 1(a)                               | 1(a)                                | 4             | 2                                     | 1(a)                                                                                     | 1(a)                                | 1(a)                                                             | 3                              |
| Shaw, S.Y. et al. 2015            | 1(a)                                          | 1(a)                                         | 1(a)                               | 1(a)                                | 4             | 2                                     | 1(a)                                                                                     | 1(a)                                | 0(c)                                                             | 2                              |
| Sonntag, B. et al. 2007           | 1(a)                                          | 0(b)                                         | 0(c)                               | 1(a)                                | 2             | 1                                     | 1(a)                                                                                     | 1(a)                                | 0(c)                                                             | 2                              |
| Springmann, V. et al. 2014        | 1(a)                                          | 1(a)                                         | 1(a)                               | 1(a)                                | 4             | 1                                     | 0(d)                                                                                     | 1(a)                                | 1(a)                                                             | 3                              |
| Strisciuglio, C. et al. 2017      | 1(a)                                          | 0(b)                                         | 1(a)                               | 1(a)                                | 3             | 2                                     | 0(c)                                                                                     | 1(a)                                | 0(c)                                                             | 1                              |
| Thompson, N.P. et al. 1995        | 0(b)                                          | 0(b)                                         | 1(a)                               | 0(b)                                | 1             | 1                                     | 0(d)                                                                                     | 1(a)                                | 0(c)                                                             | 1                              |
| Thompson, N.P. et al. 2000        | 1(a)                                          | 1(a)                                         | 1(a)                               | 0(b)                                | 3             | 0                                     | 0(c)                                                                                     | 1(a)                                | 1(a)                                                             | 2                              |
| Thorsen, S.U. et al. 2016         | 1(a)                                          | 1(a)                                         | 1(a)                               | 1(a)                                | 4             | 2                                     | 1(a)                                                                                     | 1(a)                                | 1(a)                                                             | 3                              |
| Troelsen, F.S. et al. 2019        | 0(b)                                          | 1(a)                                         | 1(a)                               | 1(a)                                | 3             | 0                                     | 1(a)                                                                                     | 1(a)                                | 0(c)                                                             | 2                              |
| Urashima, H. et al. 1999          | 1(a)                                          | 1(a)                                         | 1(a)                               | 1(a)                                | 4             | 0                                     | 0(d)                                                                                     | 1(a)                                | 1(a)                                                             | 2                              |
| Vahedi, H. et al. 2011            | 1(a)                                          | 0(b)                                         | 0(b)                               | 0(b)                                | 1             | 2                                     | 0(c)                                                                                     | 1(a)                                | 0(c)                                                             | 1                              |
| van der Sloot, K.W.J. et al. 2020 | 0(c)                                          | 1(a)                                         | 1(a)                               | 1(a)                                | 3             | 1                                     | 0(c/d)                                                                                   | 1(a)                                | 1(a)                                                             | 2                              |
| Van Limbergen, J.E. et al. 2009   | 0(c)                                          | 0(b)                                         | 0(c)                               | 0(b)                                | 0             | 2                                     | 0(c)                                                                                     | 0(b)                                | 0(c)                                                             | 0                              |
| Van Ranst, M. et al. 2005         |                                               |                                              | 1(a)                               |                                     |               | 2                                     |                                                                                          | 1(a)                                |                                                                  |                                |
| Vceva, A. et al. 2015             | 1(a)                                          | 1(a)                                         | 1(a)                               | 1(a)                                | 4             | 0                                     | 0(c)                                                                                     | 1(a)                                | 0(c)                                                             | 1                              |
| Velosa, M. et al. 2019            | 0(b)                                          | 1(a)                                         | 1(a)                               | 1(a)                                | 3             | 2                                     | 1(a)                                                                                     | 1(a)                                | 0(c)                                                             | 2                              |
| Villumsen M. et al. 2013          | 1(a)                                          | 1(a)                                         | 1(a)                               | 1(a)                                | 4             | 2                                     | 1(a)                                                                                     | 1(a)                                | 1(a)                                                             | 3                              |
| Wang, Y.F. et al. 2013            | 0(b)                                          | 0(b)                                         | 1(a)                               | 1(a)                                | 2             | 2                                     | 0(c)                                                                                     | 1(a)                                | 0(c)                                                             | 1                              |
| Whorwell, P. J. et al. 1979       | 0(c)                                          | 0(b)                                         | 1(a)                               | 0(b)                                | 1             | 0                                     | 0(c)                                                                                     | 1(a)                                | 0(c)                                                             | 1                              |
| Yu, I. et al. 2016                | 1(a)                                          | 1(a)                                         | 0(c)                               | 0(b)                                | 2             | 0                                     | 0(d)                                                                                     | 1(a)                                | 0(c)                                                             | 1                              |

| Cohort studies               |                                                       |                                                  |                                        |                                                                                       |                                       |                                                                            |                                    |                                                              |                                    |                                     |
|------------------------------|-------------------------------------------------------|--------------------------------------------------|----------------------------------------|---------------------------------------------------------------------------------------|---------------------------------------|----------------------------------------------------------------------------|------------------------------------|--------------------------------------------------------------|------------------------------------|-------------------------------------|
| Study (name, year)           | Selection                                             |                                                  |                                        |                                                                                       |                                       | Comparability                                                              | Outcome                            |                                                              |                                    |                                     |
|                              | 1. Representativeness of the exposed cohort (1 point) | 2. Selection of the non exposed cohort (1 point) | 3. Ascertainment of exposure (1 point) | 4. Demonstration that outcome of interest was not present at start of study (1 point) | Total points for selection (4 points) | Comparability of cohorts on the basis of the design or analysis (2 points) | 1. Assessment of outcome (1 point) | 2. Was follow-up long enough for outcomes to occur (1 point) | 3. Adequacy of follow up (1 point) | Total points for outcome (3 points) |
| Agrawal, M. et al. 2020      | 1(a)                                                  | 1(a)                                             | 1(a)                                   | 1(a)                                                                                  | 4                                     | 2                                                                          | 1(a)                               | 1(a)                                                         | 1(a)                               | 3                                   |
| Andersen, V. et al. 2013     | 1(a)                                                  | 1(a)                                             | 1(a)                                   | 0(b)                                                                                  | 3                                     | 2                                                                          | 1(b)                               | 0(b)                                                         | 0(d)                               | 1                                   |
| Andersen, V. et al. 2020     | 1(a)                                                  | 1(a)                                             | 1(a)                                   | 1(a)                                                                                  | 4                                     | 2                                                                          | 1(a)                               | 1(a)                                                         | 0(c)                               | 2                                   |
| Aspberg, S. et al. 2006      | 1(a)                                                  | 1(a)                                             | 1(a)                                   | 1(a)                                                                                  | 4                                     | 0                                                                          | 1(a)                               | 1(a)                                                         | 0(d)                               | 2                                   |
| Bager, P. et al. 2012        | 1(a)                                                  | 1(a)                                             | 1(a)                                   | 0(b)                                                                                  | 3                                     | 2                                                                          | 1(b)                               | 1(a)                                                         | 0(d)                               | 2                                   |
| Benchimol, E. et al. 2015    | 1(a)                                                  | 1(a)                                             | 1(a)                                   | 1(a)                                                                                  | 4                                     | 2                                                                          | 1(b)                               | 1(a)                                                         | 1(a)                               | 3                                   |
| Benchimol, E.I. et al. 2017  | 1(a)                                                  | 1(a)                                             | 1(a)                                   | 1(a)                                                                                  | 4                                     | 2                                                                          | 1(b)                               | 0(b)                                                         | 0(d)                               | 1                                   |
| Black, M. et al. 2015        | 1(a)                                                  | 1(a)                                             | 0(a)                                   | 0(b)                                                                                  | 2                                     | 2                                                                          | 1(b)                               | 1(a)                                                         | 0(c)                               | 2                                   |
| Black, M. et al. 2015        | 0(d)                                                  | 1(a)                                             | 1(a)                                   | 1(a)                                                                                  | 3                                     | 2                                                                          | 1(b)                               | 1(a)                                                         | 1(a)                               | 3                                   |
| Blomster, T.M. et al. 2014   | 1(a)                                                  | 1(a)                                             | 1(b)                                   | 1(a)                                                                                  | 4                                     | 2                                                                          | 1(b)                               | 1(a)                                                         | 1(b)                               | 3                                   |
| Burnett, D. et al. 2017      | 1(a)                                                  | 1(a)                                             | 1(a)                                   | 1(a)                                                                                  | 4                                     | 2                                                                          | 1(b)                               | 1(a)                                                         | 0(d)                               | 2                                   |
| Burnett, D. et al. 2020      | 1(a)                                                  | 1(a)                                             | 1(a)                                   | 1(a)                                                                                  | 4                                     | 2                                                                          | 1(b)                               | 1(a)                                                         | 0(c)                               | 2                                   |
| Card, T.R. et al. 2002       | 1(a)                                                  | 1(a)                                             | 1(a)                                   | 1(a)                                                                                  | 4                                     | 1                                                                          | 1(b)                               | 1(a)                                                         | 1(b)                               | 3                                   |
| Chowers, Y. et al. 2004      | 1(a)                                                  | 1(a)                                             | 1(a)                                   | 1(a)                                                                                  | 4                                     | 1                                                                          | 1(b)                               | 1(a)                                                         | 0(d)                               | 2                                   |
| Ekbom, A. et al. 1991        | 1(a)                                                  | 1(a)                                             | 1(a)                                   | 1(a)                                                                                  | 4                                     | 1                                                                          | 1(b)                               | 1(a)                                                         | 0(d)                               | 2                                   |
| Elten, M. et al. 2020        | 1(a)                                                  | 1(a)                                             | 1(a)                                   | 0(b)                                                                                  | 3                                     | 2                                                                          | 1(a)                               | 1(a)                                                         | 1(a)                               | 3                                   |
| Ghersin, I. et al. 2019      | 1(a)                                                  | 1(a)                                             | 1(a)                                   | 1(a)                                                                                  | 4                                     | 2                                                                          | 1(b)                               | 0(b)                                                         | 1(a)                               | 2                                   |
| Greenbaum, S. et al. 2018    | 1(a)                                                  | 1(a)                                             | 0(d)                                   | 1(a)                                                                                  | 3                                     | 2                                                                          | 0(d)                               | 0(b)                                                         | 0(d)                               | 0                                   |
| Khalili, H. et al. 2012      | 1(b)                                                  | 1(a)                                             | 1(b)                                   | 1(a)                                                                                  | 4                                     | 2                                                                          | 1(a)                               | 1(b)                                                         | 1(a)                               | 3                                   |
| Khalili, H. et al. 2013      | 1(a)                                                  | 1(a)                                             | 1(a)                                   | 0(b)                                                                                  | 3                                     | 2                                                                          | 1(b)                               | 1(a)                                                         | 1(b)                               | 3                                   |
| Klement, E. et al. 2008      | 1(a)                                                  | 1(a)                                             | 1(b)                                   | 1(a)                                                                                  | 4                                     | 2                                                                          | 1(b)                               | 0(b)                                                         | 1(b)                               | 2                                   |
| Konijeti, G. et al. 2013     | 1(a)                                                  | 1(a)                                             | 1(b)                                   | 1(a)                                                                                  | 4                                     | 2                                                                          | 1(b)                               | 1(a)                                                         | 1(b)                               | 2                                   |
| Kronman, M.P. et al. 2012    | 1(a)                                                  | 1(a)                                             | 1(a)                                   | 1(a)                                                                                  | 4                                     | 2                                                                          | 1(b)                               | 1(a)                                                         | 1(b)                               | 3                                   |
| Lange, A. et al. 2014        | 1(a)                                                  | 1(a)                                             | 0(d)                                   | 0(b)                                                                                  | 2                                     | 1                                                                          | 0(d)                               | 1(a)                                                         | 0(c)                               | 1                                   |
| Li, X. et al. 2011           | 1(a)                                                  | 1(a)                                             | 1(a)                                   | 1(a)                                                                                  | 4                                     | 2                                                                          | 1(b)                               | 1(a)                                                         | 1(b)                               | 3                                   |
| Montgomery, S.M. et al. 1999 | 1(a)                                                  | 1(a)                                             | 1(a)                                   | 1(a)                                                                                  | 4                                     | 2                                                                          | 1(a)1(b)                           | 1(b)                                                         | 1(a)                               | 3                                   |
| Morris, D.L. et al. 2000     | 1(a)                                                  | 1(a)                                             | 1(b)                                   | 1(a)                                                                                  | 4                                     | 1                                                                          | 1(b)                               | 1(a)                                                         | 1(b)                               | 1                                   |
| Nylund, C. et al. 2019       | 1(a)                                                  | 1(a)                                             | 1(a)                                   | 0(b)                                                                                  | 3                                     | 2                                                                          | 1(a)                               | 1(a)                                                         | 0(d)                               | 2                                   |
| Ortqvist, A.K. et al. 2019   | 1(a)                                                  | 1(a)                                             | 1(a)                                   | 1(a)                                                                                  | 4                                     | 2                                                                          | 1(b)                               | 1(a)                                                         | 1(b)                               | 3                                   |
| Ponsonby, A.L. et al. 2009   | 1(a)                                                  | 1(a)                                             | 1(a)                                   | 0(b)                                                                                  | 3                                     | 2                                                                          | 1(b)                               | 1(a)                                                         | 0(d)                               | 2                                   |
| Seagroatt, V. et al. 2003    | 1(a)                                                  | 1(a)                                             | 1(a)                                   | 1(a)                                                                                  | 4                                     | 0                                                                          | 1(a)                               | 1(a)                                                         | 0(d)                               | 2                                   |
| Sonnenberg, A. et al. 2009   | 1(a)                                                  | 1(a)                                             | 1(a)                                   | 1(a)                                                                                  | 4                                     | 1                                                                          | 1(b)                               | 1(a)                                                         | 1(b)                               | 3                                   |
| Steiner, N. et al. 2019      | 1(a)                                                  | 1(a)                                             | 1(a)                                   | 1(a)                                                                                  | 4                                     | 2                                                                          | 1(b)                               | 1(a)                                                         | 1(b)                               | 3                                   |
| Timm, S. et al. 2014         | 1(a)                                                  | 1(a)                                             | 1(b)                                   | 1(a)                                                                                  | 4                                     | 2                                                                          | 0(c)                               | 1(a)                                                         | 1(b)                               | 2                                   |
| Yoles, I. et al. 2018        | 1(b)                                                  | 1(a)                                             | 1(a)                                   | 1(a)                                                                                  | 4                                     | 1                                                                          | 1(b)                               | 0(b)                                                         | 0(d)                               | 1                                   |

## APPENDIX C: Supplementary Figures

**Supplementary Figure 1:** Meta-regression of cohort vs case-control studies on the association between maternal smoking and subsequent IBD diagnosis in the offspring (P value of slope 0.45)

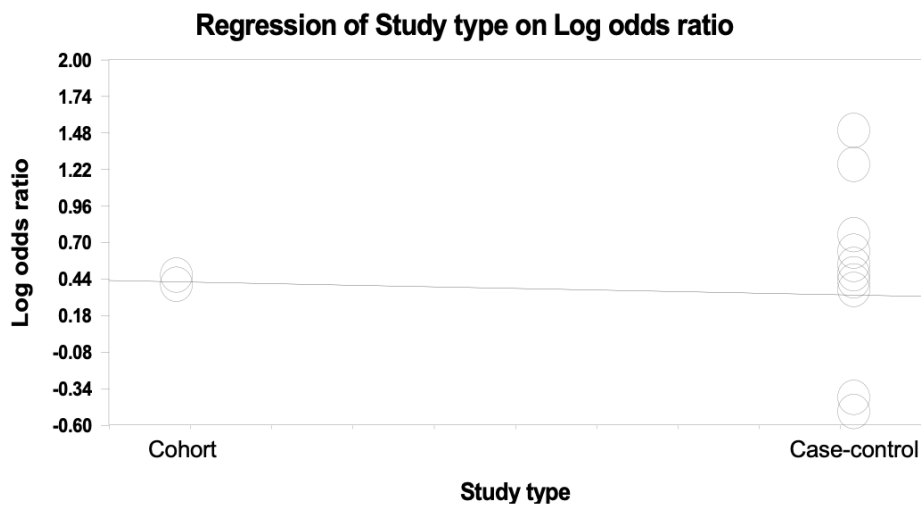

**Supplementary Figure 2:** Funnel plot to assess publication bias in studies on the association between maternal smoking and subsequent IBD diagnosis in the offspring (Egger's 2-sided p-value 0.451)

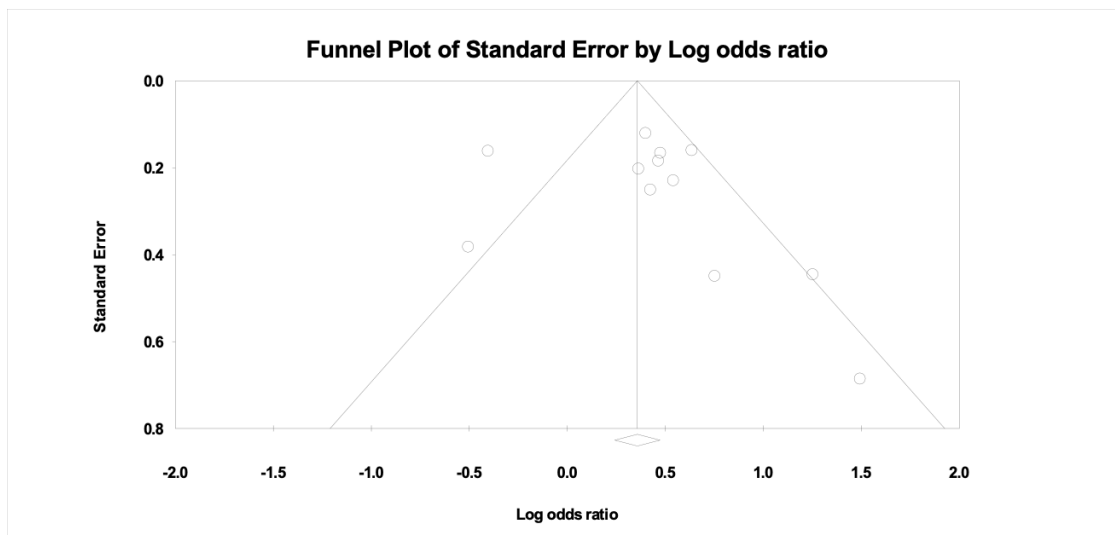

**Supplementary Figure 3:** Forest plot of the association between older maternal age and subsequent IBD diagnosis in the offspring ( $I^2$  87.06%)

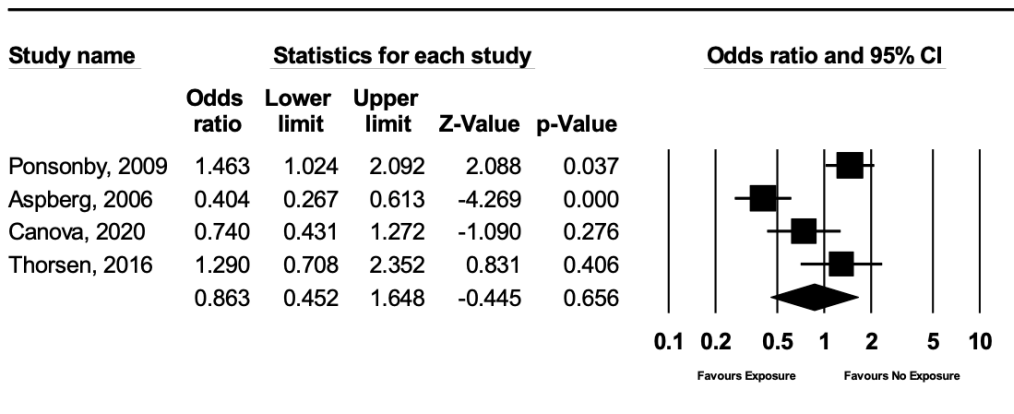

**Supplementary Figure 4:** Funnel plot to assess publication bias in studies on the association between older maternal age and subsequent IBD diagnosis in the offspring

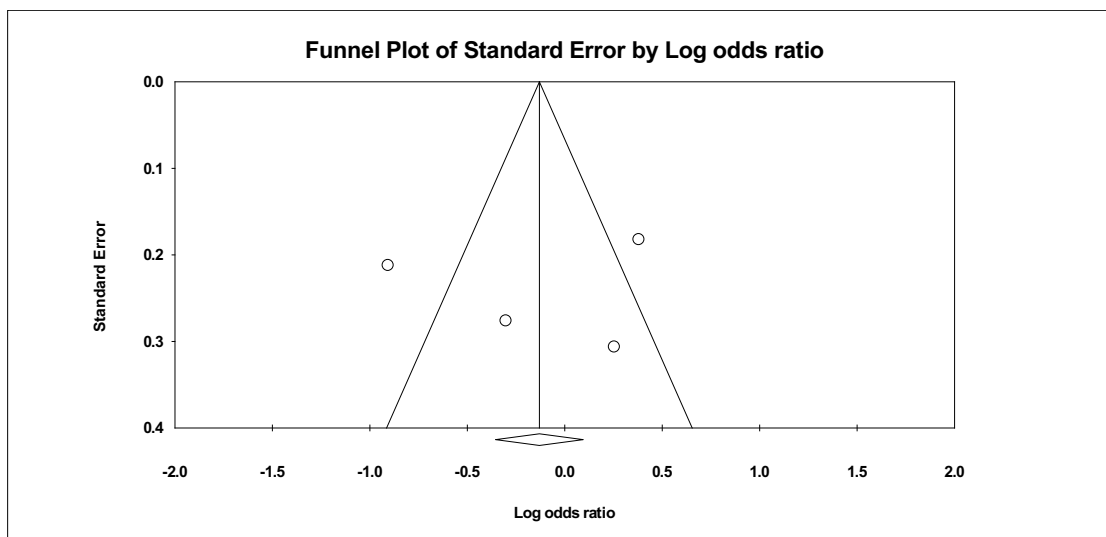

**Supplementary Figure 5:** Forest plot of the association between older maternal age and subsequent CD diagnosis in the offspring ( $I^2$  95.27%)

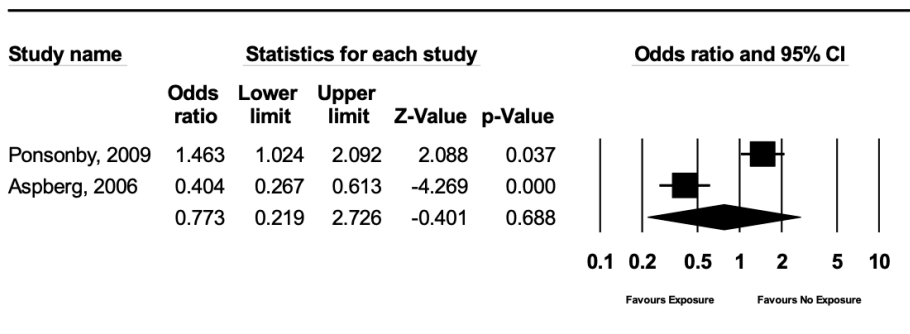

**Supplementary Figure 6:** Forest plot of the association between low birth weight and subsequent IBD diagnosis ( $I^2$  76.75%)

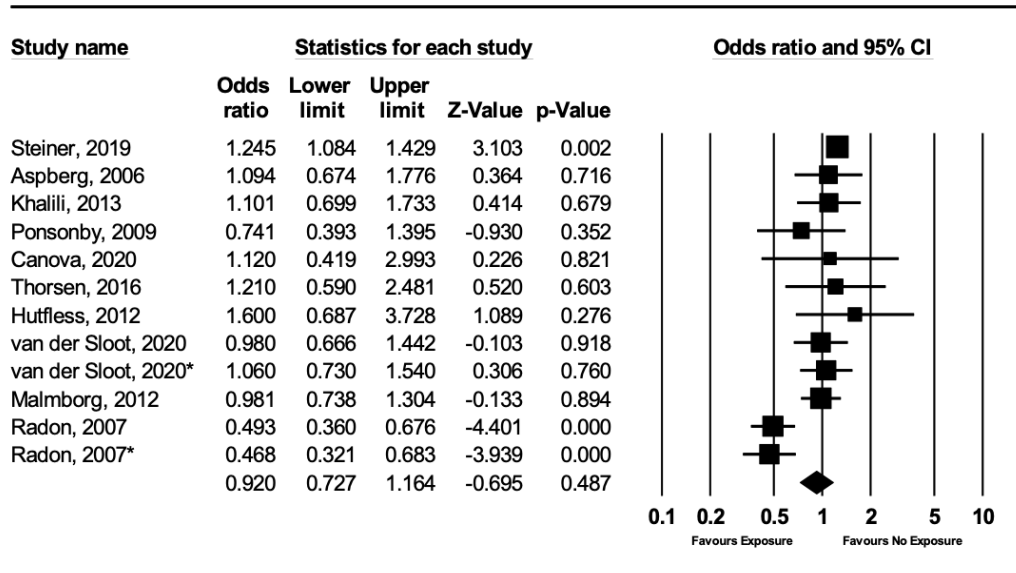

**Supplementary Figure 7:** Forest plot of the association between low birth weight and subsequent CD diagnosis ( $I^2$  70.72%)

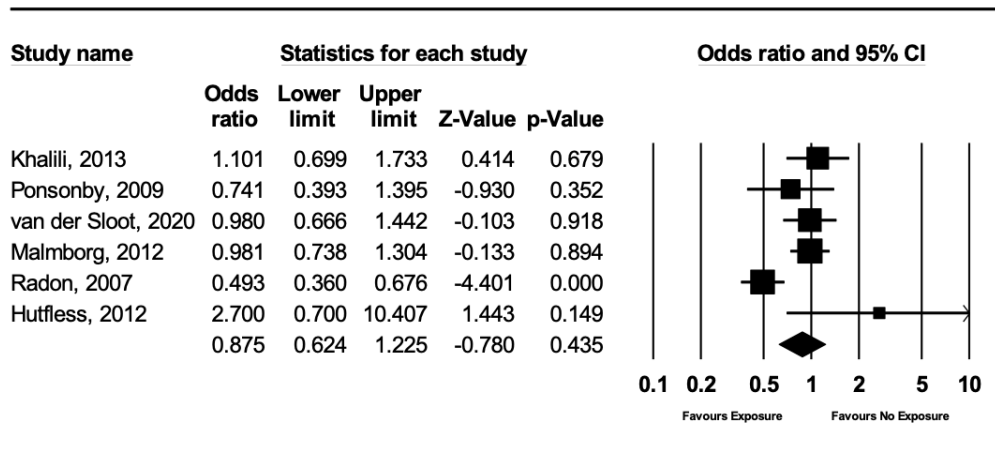

**Supplementary Figure 8:** Forest plot of the association between low birth weight and subsequent UC diagnosis ( $I^2$  81.66%)

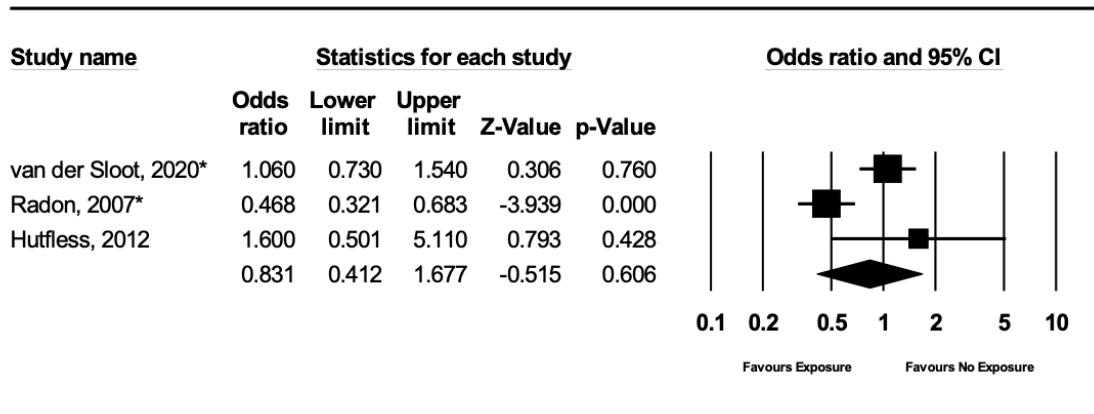

**Supplementary Figure 9:** Meta-regression of cohort vs case-control studies on the association between low birth weight and subsequent IBD diagnosis (P value of slope <0.001)

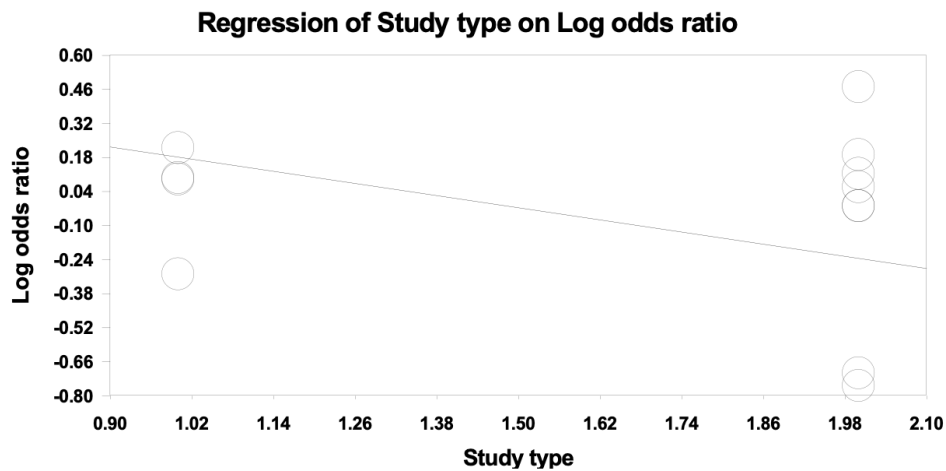

**Supplementary Figure 10:** Forest plot of the association between low birth weight and subsequent IBD diagnosis: cohort studies ( $I^2$  42.67%)

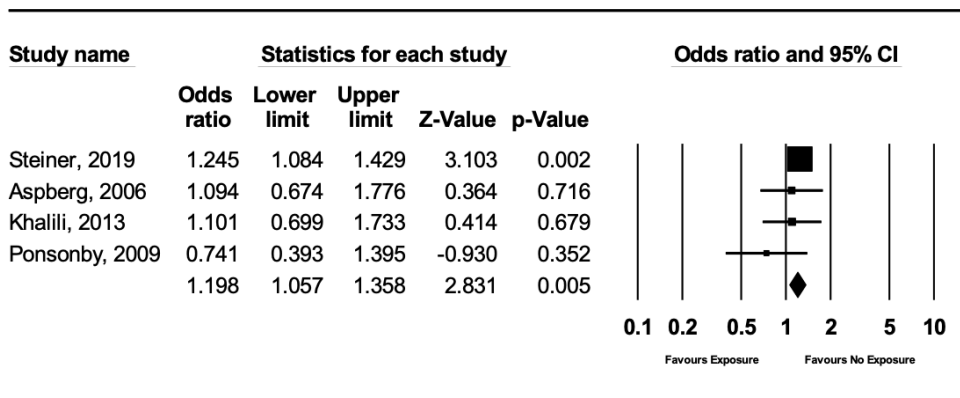

**Supplementary Figure 11:** Forest plot of the association between low birth weight and subsequent IBD diagnosis: case-control studies ( $I^2$  73.39%)

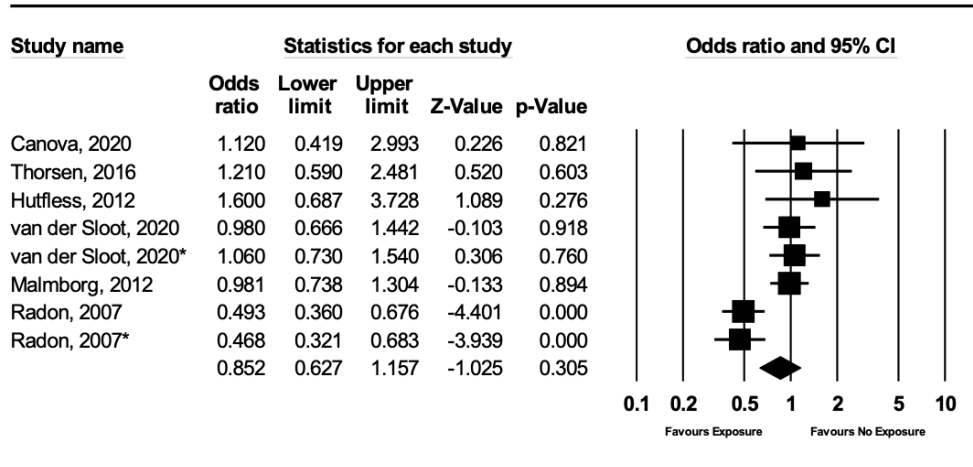

**Supplementary Figure 12:** Funnel plot to assess publication bias in studies on the association between low birth weight and subsequent IBD diagnosis (Egger's 2-sided p-value 0.353)

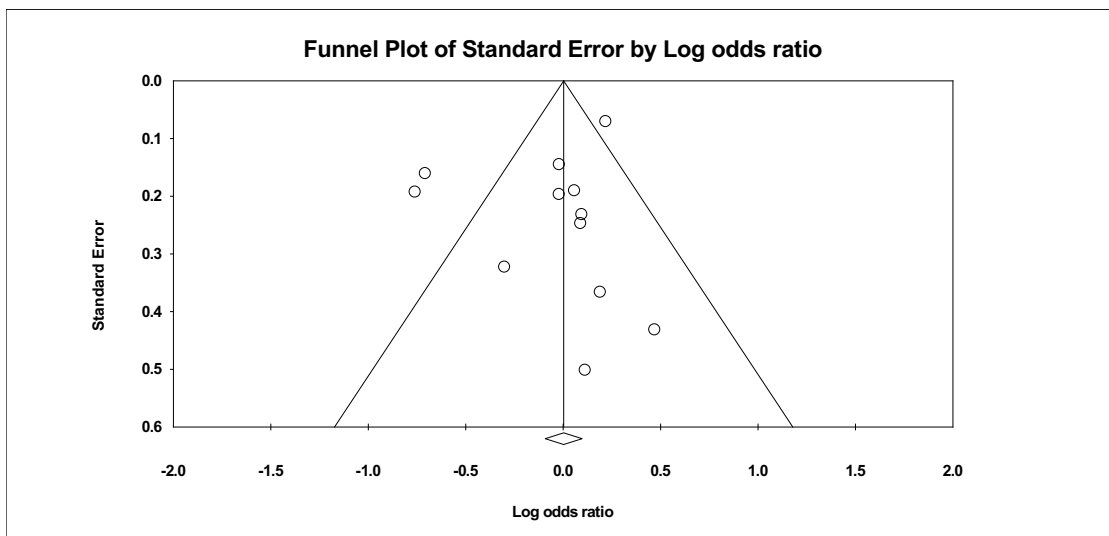

**Supplementary Figure 13:** Forest plot of the association between premature birth and subsequent IBD diagnosis ( $I^2$  26.47%)

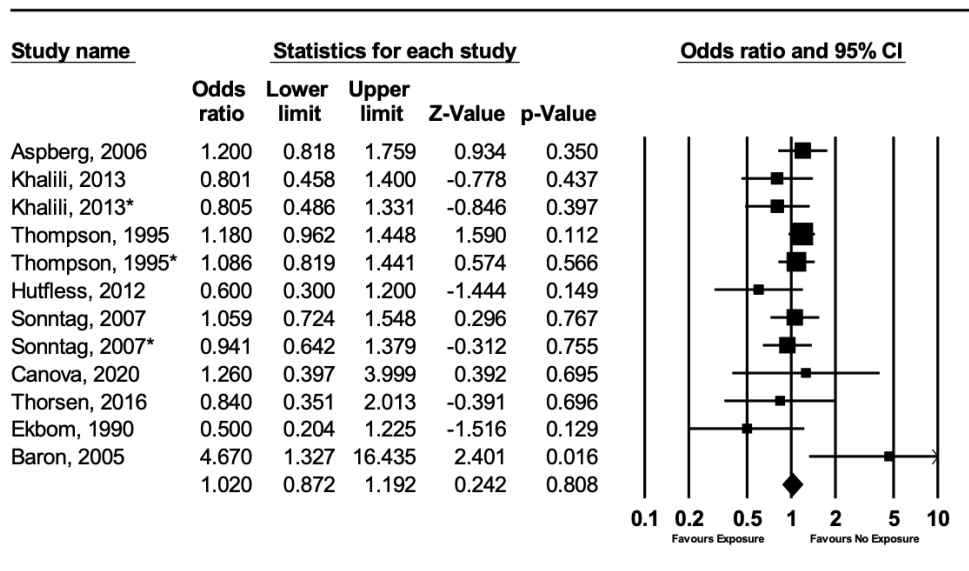

**Supplementary Figure 14:** Forest plot of the association between premature birth and subsequent CD diagnosis ( $I^2$  5.33%)

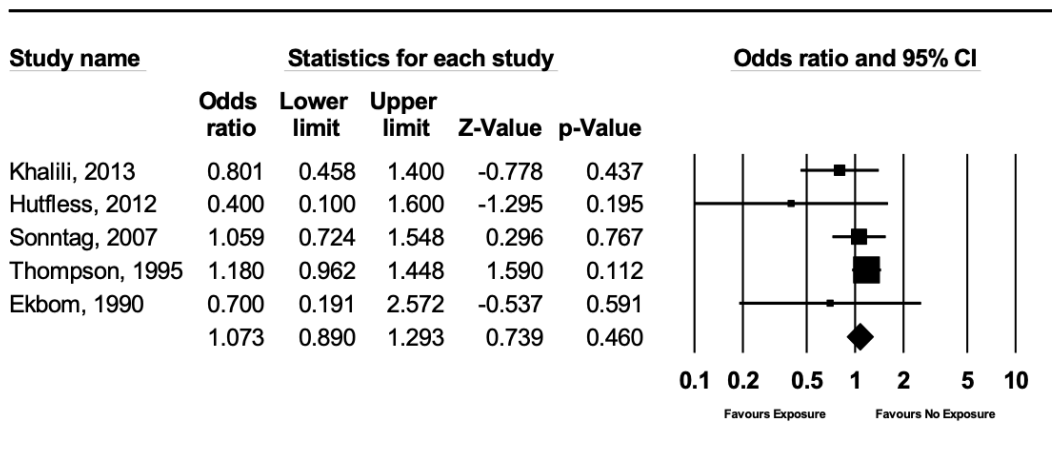



**Supplementary Figure 15:** Forest plot of the association between premature birth and subsequent UC diagnosis ( $I^2$  46.91%)

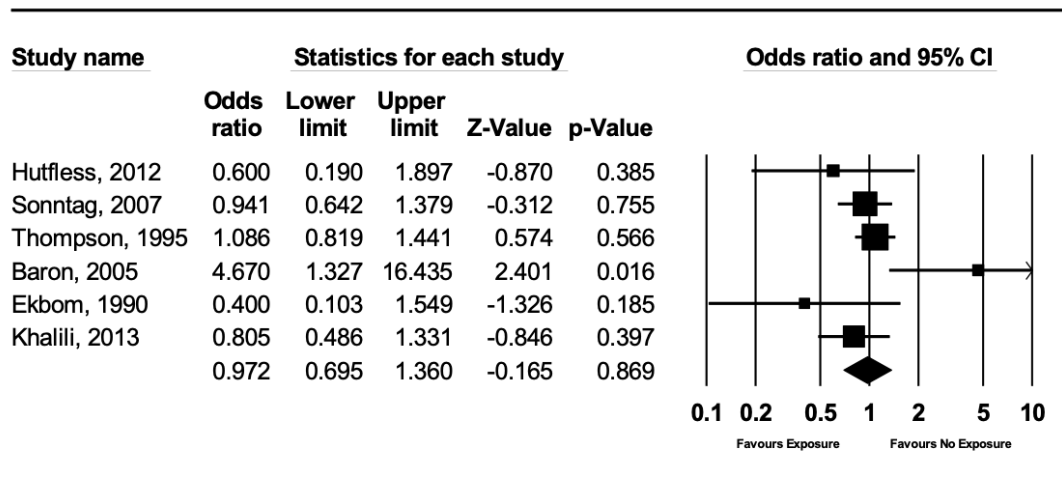

**Supplementary Figure 16:** Meta-regression of cohort vs case-control studies on the association between premature birth and subsequent IBD diagnosis (P value of slope 0.538)

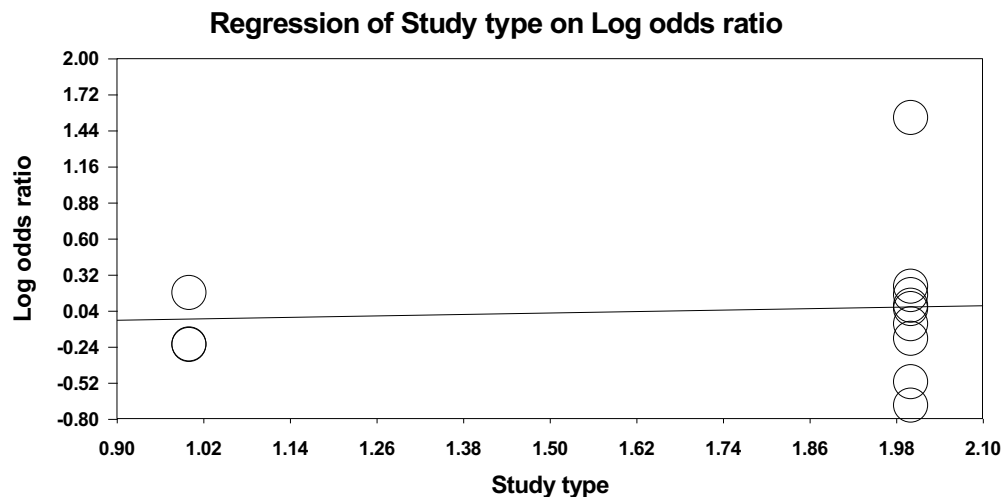

**Supplementary Figure 17:** Funnel plot to assess publication bias in studies on the association between premature birth and subsequent IBD diagnosis (Egger's 2-sided p-value 0.41)

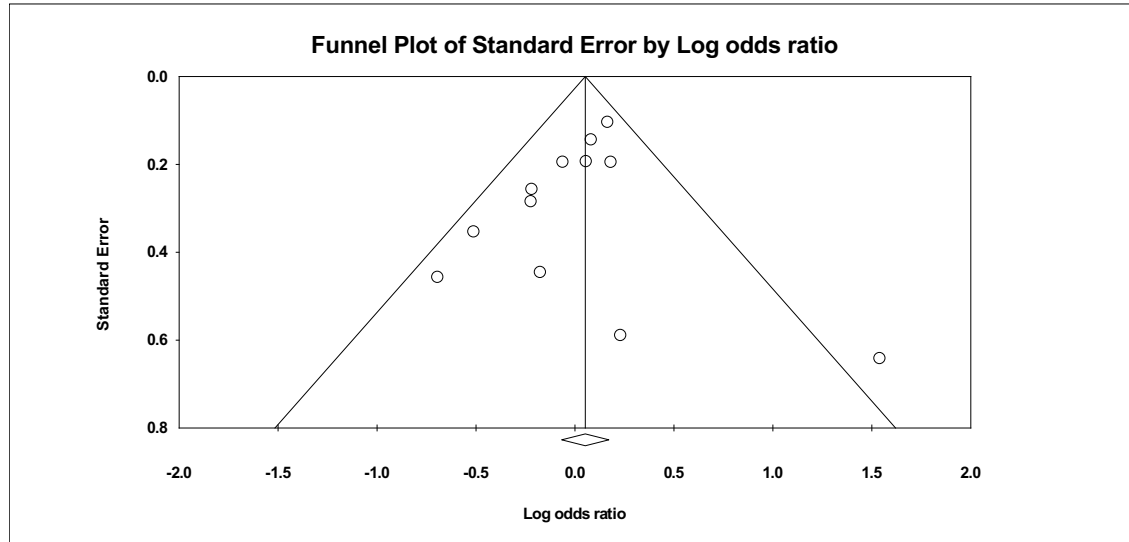

**Supplementary Figure 18:** Forest plot of the association between rural vs urban living and subsequent IBD diagnosis ( $I^2$  52.76%)

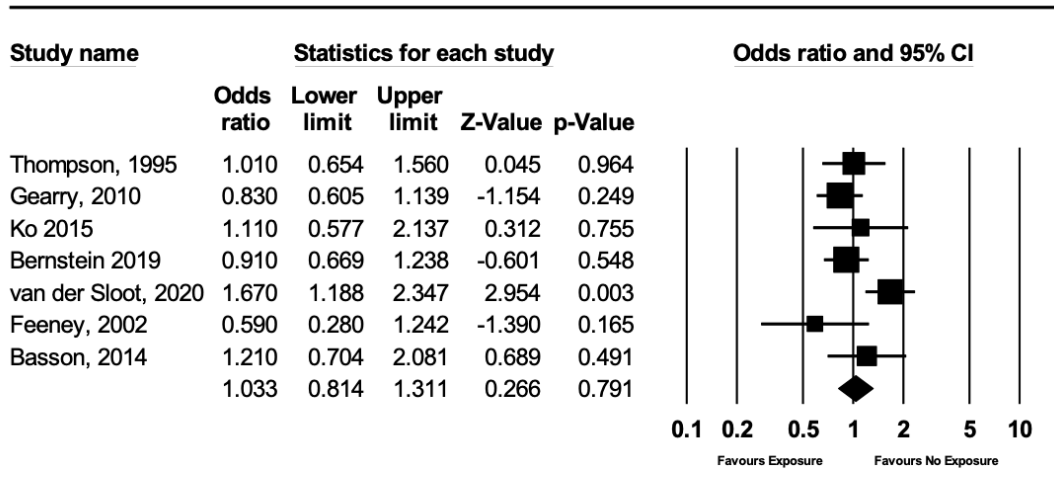

**Supplementary Figure 19:** Forest plot of the association between rural vs urban living and subsequent CD diagnosis ( $I^2$  68.81%)

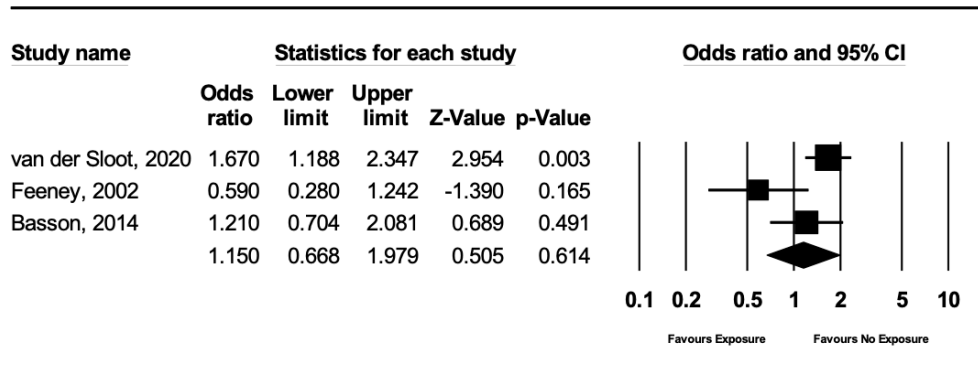

**Supplementary Figure 20:** Forest plot of the association between rural vs urban living and subsequent UC diagnosis ( $I^2$  38.33%)

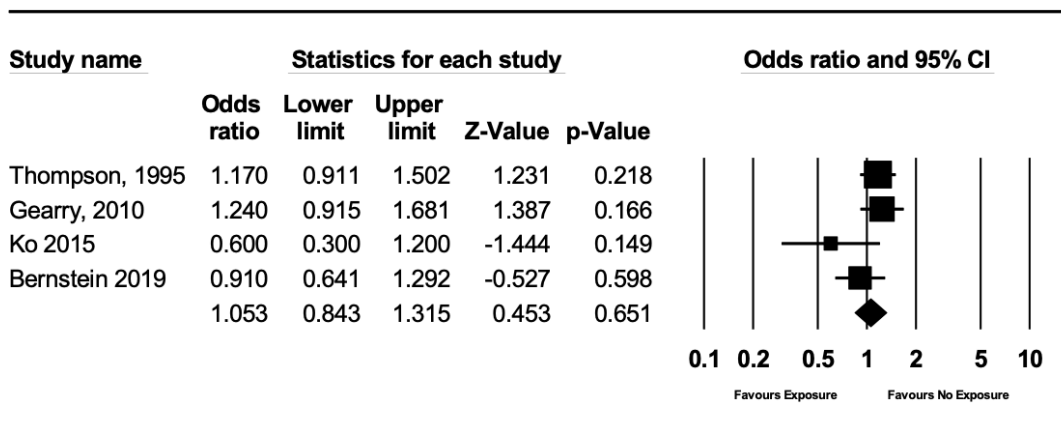

**Supplementary Figure 21:** Funnel plot to assess publication bias in studies on the association between rural vs urban and subsequent IBD diagnosis

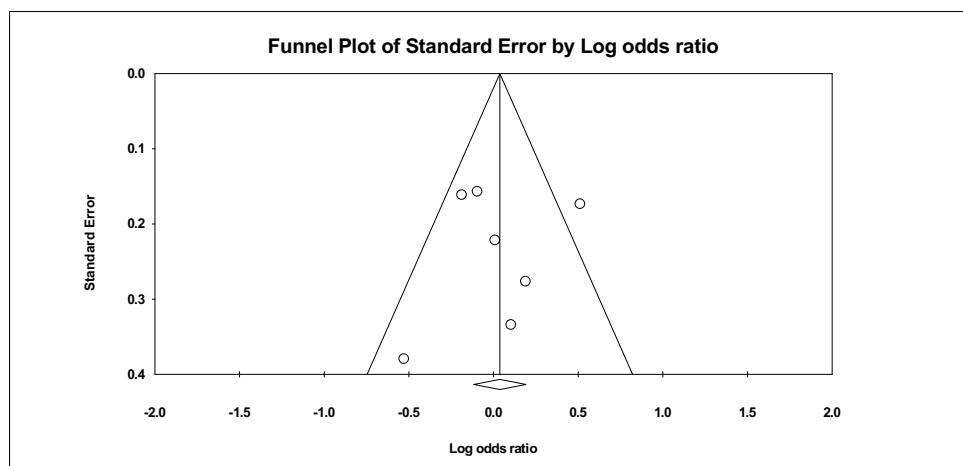

**Supplementary Figure 22:** Forest plot of the association between antibiotic exposure during infancy and subsequent CD diagnosis ( $I^2$  49.29%)

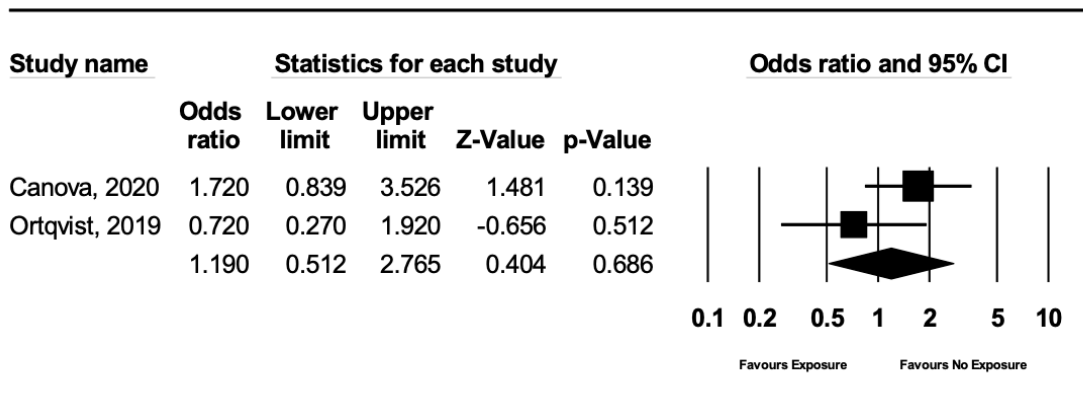

**Supplementary Figure 23:** Forest plot of the association between antibiotic exposure during infancy and subsequent UC diagnosis ( $I^2$  44.82%)

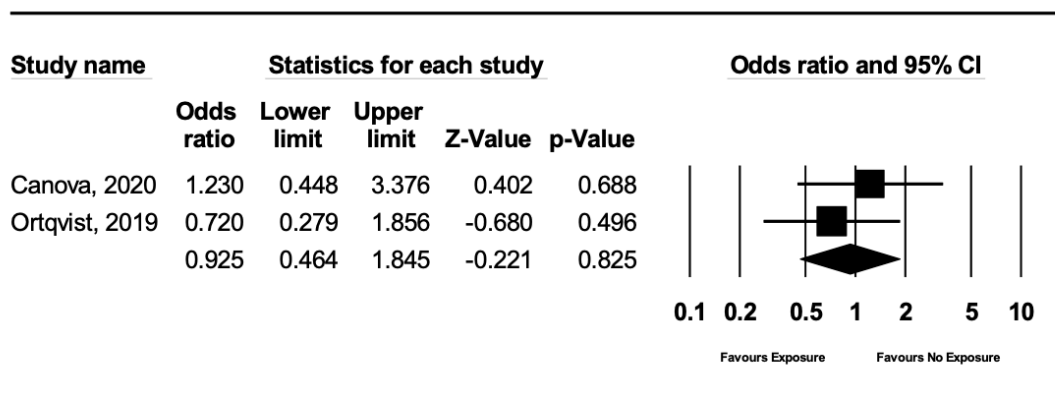

**Supplementary Figure 24:** Funnel plot to assess publication bias in studies on the association between antibiotic exposure during infancy and subsequent IBD diagnosis

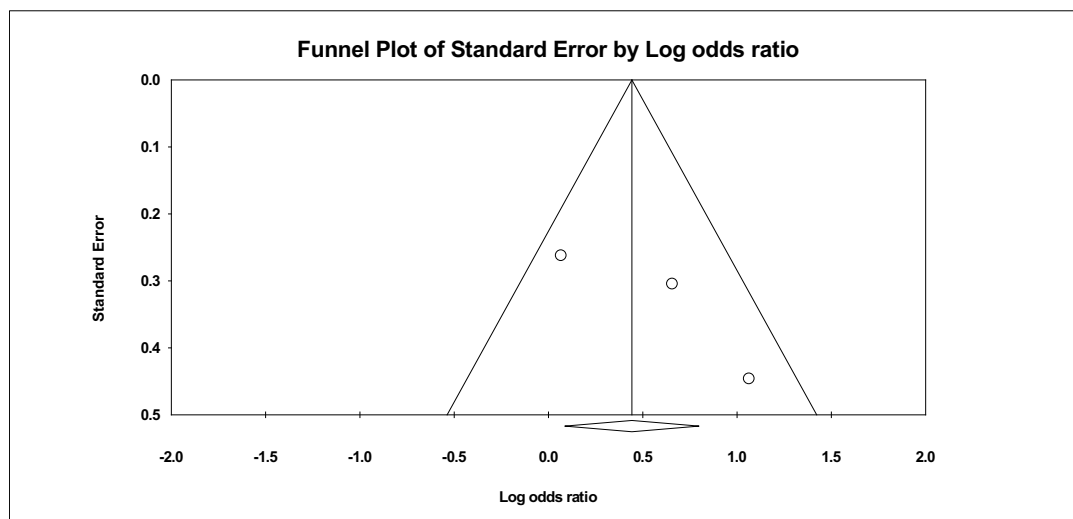

**Supplementary Figure 25:** Forest plot of the association between measles vaccine and subsequent IBD diagnosis ( $I^2$  55.52%)

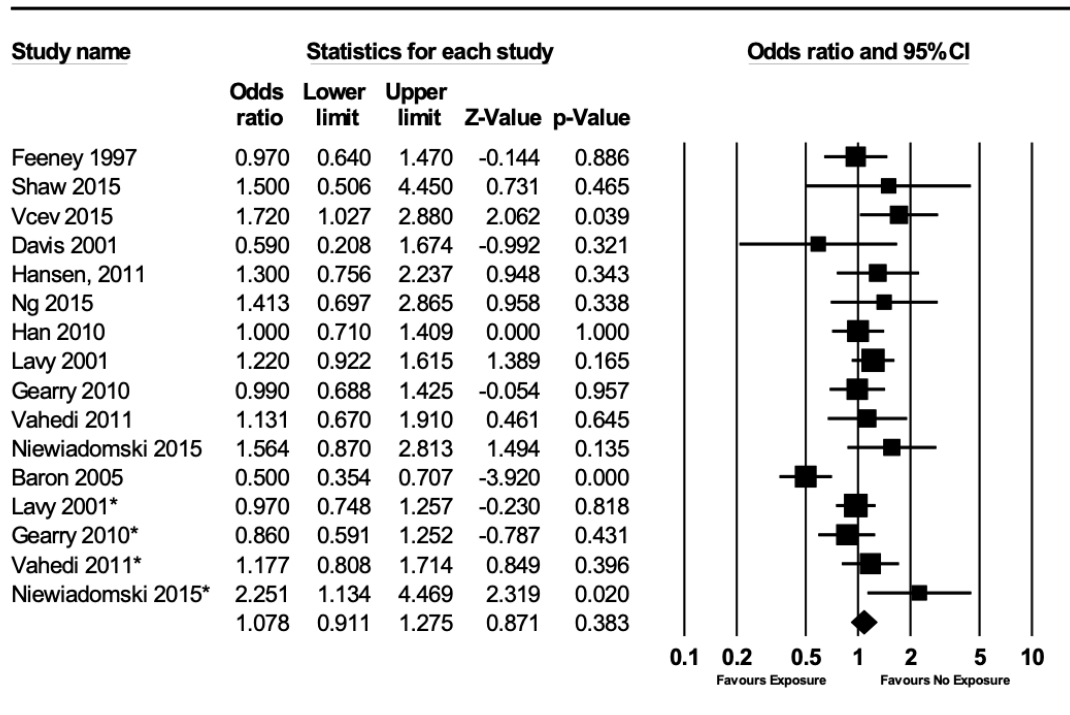

**Supplementary Figure 26:** Forest plot of the association between measles vaccine and subsequent CD diagnosis ( $I^2$  64.69%)

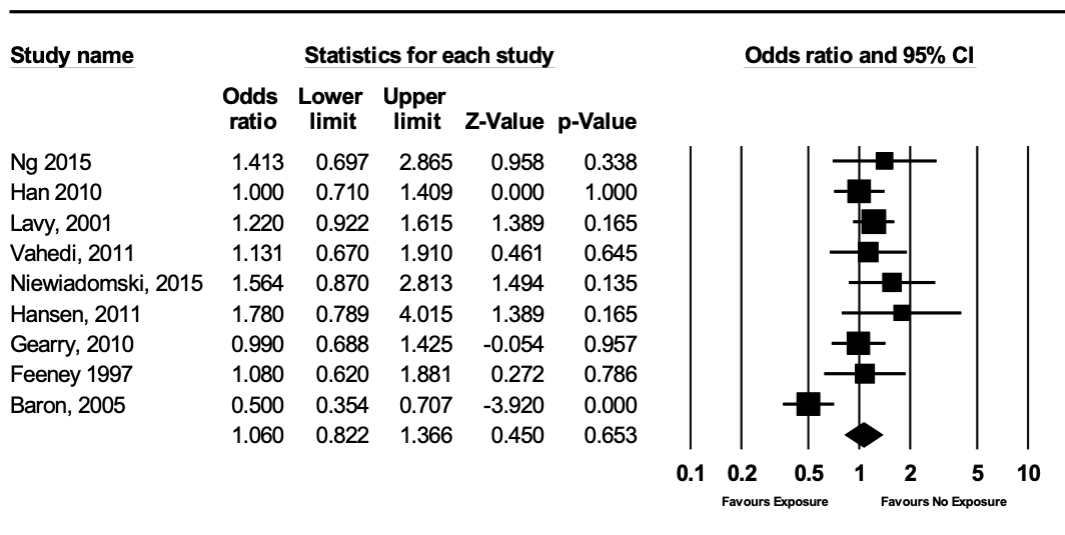

**Supplementary Figure 27:** Forest plot of the association between measles vaccine and subsequent UC diagnosis ( $I^2$  28.2%)

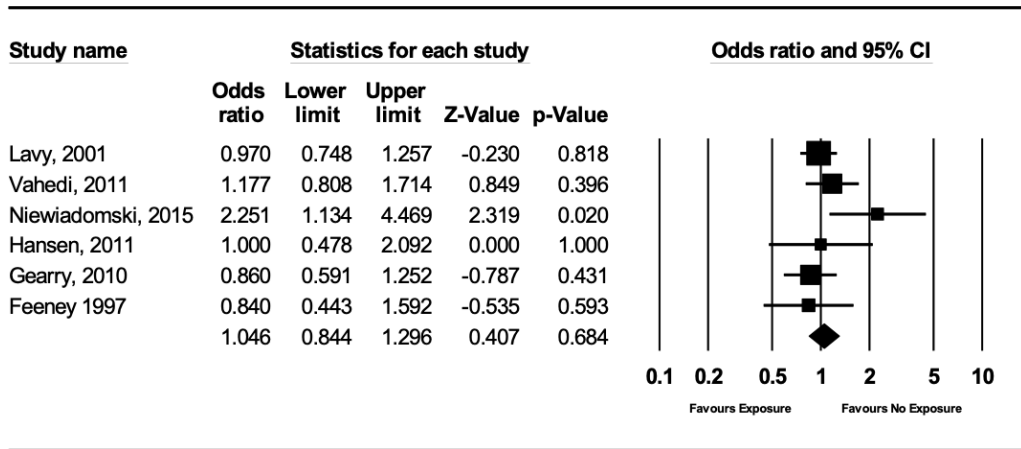

**Supplementary Figure 28:** Funnel plot to assess publication bias in studies on the association between measles vaccine and subsequent IBD diagnosis (Egger's 2-sided p-value = 0.206)

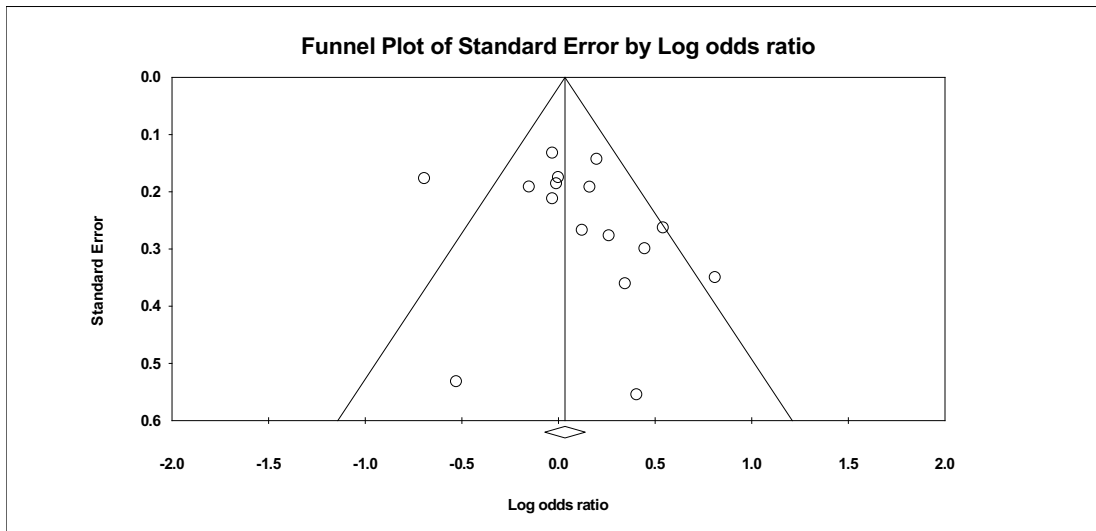

**Supplementary Figure 29:** Forest plot of the association between BCG vaccine and subsequent IBD diagnosis ( $I^2$  37.58%)

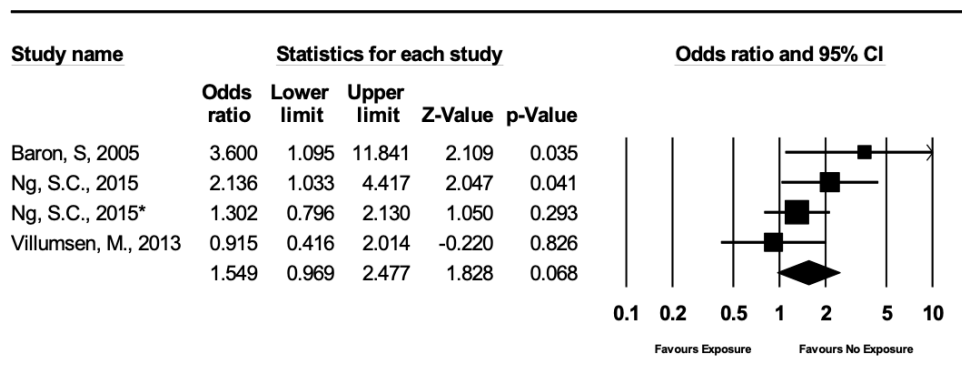

**Supplementary Figure 30:** Forest plot of the association between BCG vaccine and subsequent CD diagnosis ( $I^2$  53.17%)

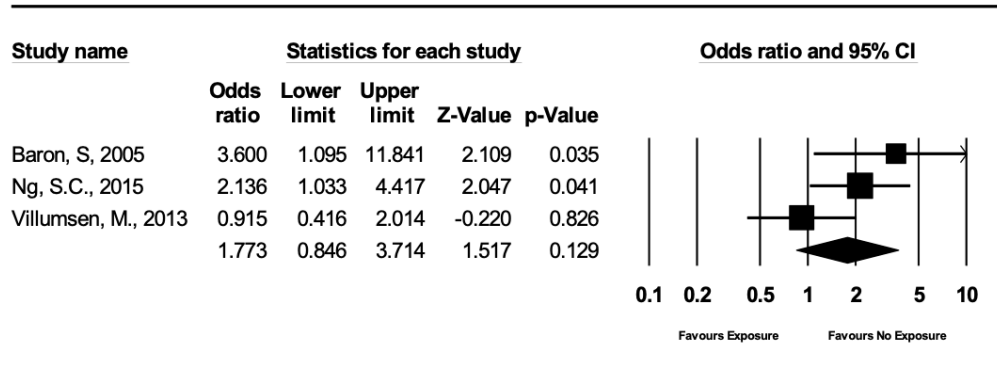

**Supplementary Figure 31:** Funnel plot to assess publication bias in studies on the association between BCG vaccine and subsequent IBD diagnosis

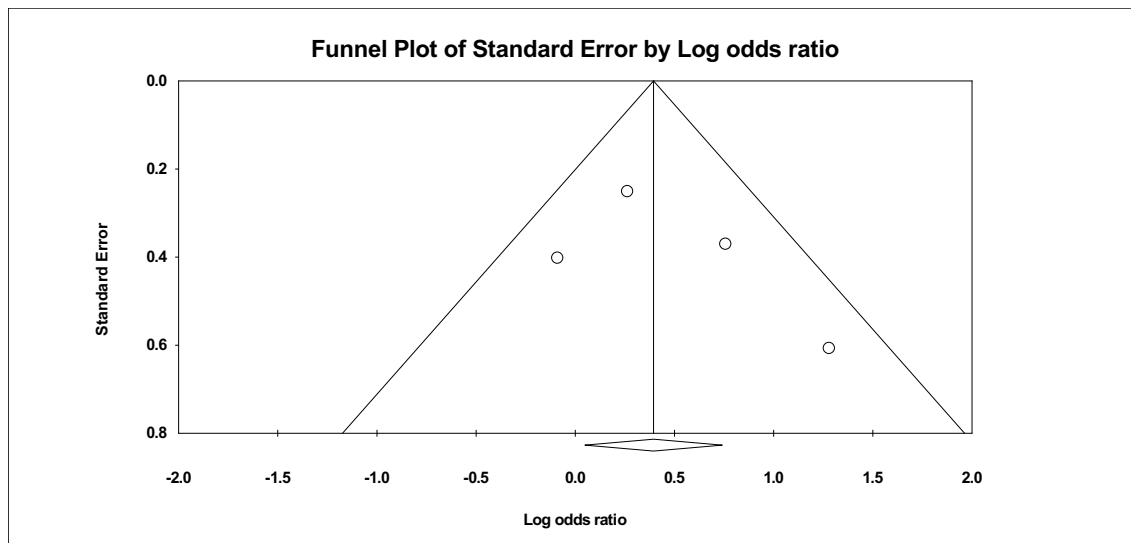

**Supplementary Figure 32:** Forest plot of the association between passive exposure to tobacco smoke and subsequent CD diagnosis ( $I^2$  64.16%)

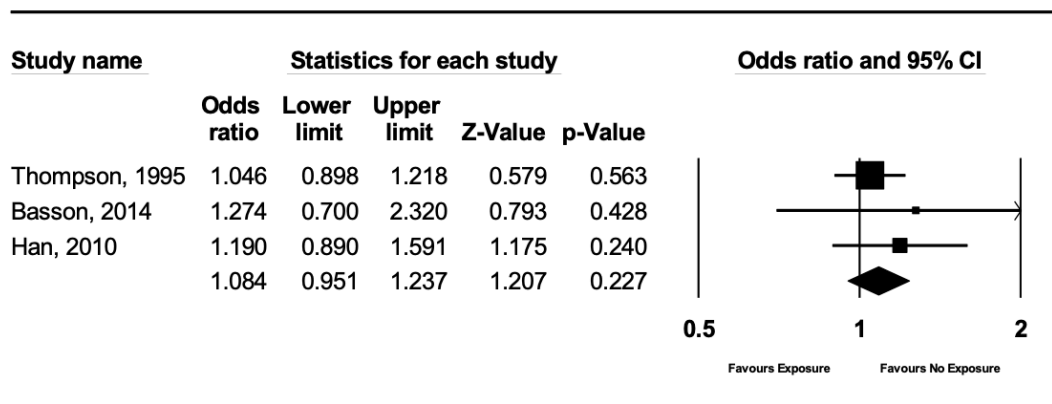

**Supplementary Figure 33:** Funnel plot to assess publication bias in studies on the association between passive exposure to tobacco smoke and subsequent CD diagnosis

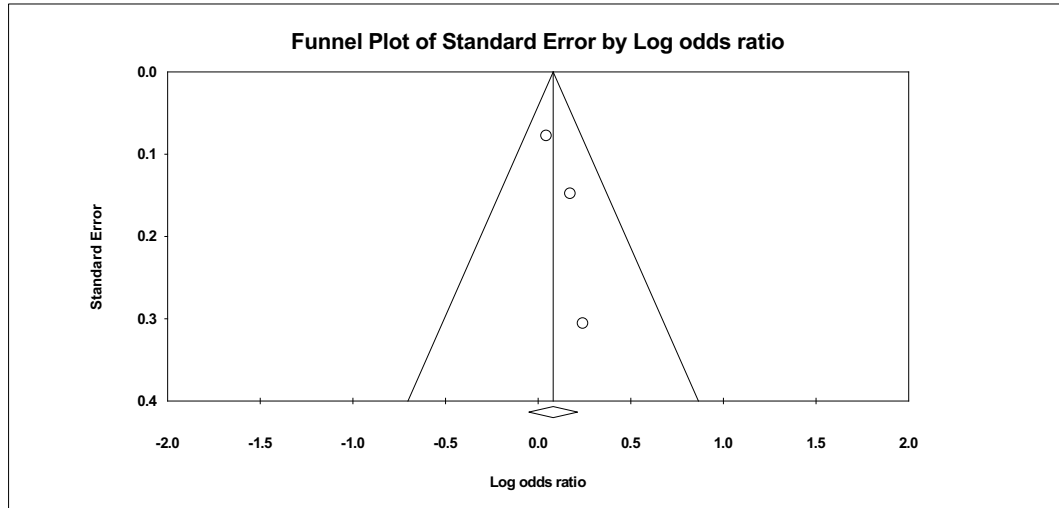

Supplement: mmc1.pdf [file mmc1.pdf]
